# Supplementary material for: Cytoprotective Polyketides from Sponge-Derived Fungus Lopadostoma pouzarii
Source: MDPI journal article supplement (doi:10.3390/molecules27217650), 2022-11-07

# Supplementary Materials

## Cytoprotective polyketides from sponge-derived fungus *Lopadostoma pouzarii*

Phan Thi Hoai Trinh<sup>1,‡</sup>, Anton N. Yurchenko<sup>2,‡,\*</sup>, Olga O. Khmel<sup>3</sup>, Trang Vo Thi Dieu<sup>1</sup>, Ngo Thi Duy Ngoc<sup>1</sup>, Elena V. Girich<sup>2</sup>, Alexander S. Menshov<sup>2</sup>, Natalya Y. Kim<sup>2</sup>, Ekaterina A. Chingizova<sup>2</sup>, Tran Thi Thanh Van<sup>1</sup>, Jong Seok Lee<sup>4</sup>, Hyi-Seung Lee<sup>4</sup> and Ekaterina A. Yurchenko<sup>2,\*</sup>

<sup>1</sup> Nhatrang Institute of Technology Research and Application, Vietnam Academy of Science and Technology, Nha Trang 650000, Vietnam

<sup>2</sup> G.B. Elyakov Pacific Institute of Bioorganic Chemistry Far Eastern Branch of Russian Academy of Science, prospect 100-letiya Vladivostoka, 159, Vladivostok 690022, Russia

<sup>3</sup> Institute of High Technologies and Advanced Materials, Far Eastern Federal University, 10 Ajax Bay, Russky Island, Vladivostok 690922, Russia

<sup>4</sup> Korea Institute of Ocean Science and Technology, 385 Haeyang-ro, Yeongdo-gu, Busan 49111, Korea

\* **Correspondence:** eyurch@piboc.dvo.ru (E.A.Y.); yurchenkoan@piboc.dvo.ru (A.N.Y.)

# **These authors contributed equally to this work**

**Abstract:** The new polyketides lopouzanones A and B as well as new 1-*O*-acetyl and 2-*O*-acetyl derivatives of dendrodochol B were isolated from sponge-derived marine fungus *Lopadostoma pouzarii* strain 168CLC-57.3. Moreover, six known polyketides gliorosein, balticolid, dendrodolide G, dihydroisocumarine, (–)-5-methylmellein and dendrodochol B were identified. Structures of isolated compounds were determined by a combination of NMR and ESIMS techniques. The absolute configurations of lopouzanones A and B were determined using the Mosher's method. The cytotoxicity of isolated compounds against human prostate cancer cells PC-3 and normal rat cardiomyocytes H9c2 were investigated. Gliorosein showed a weak DPPH radical scavenging activity and *in vitro* cardioprotective effects toward rotenone toxicity and CoCl<sub>2</sub>-mimic hypoxia.

**Keywords:** marine fungi; sea sponge; secondary metabolites; polyketides; cytotoxicity; cardioprotection.

|                                                                                                      |    |
|------------------------------------------------------------------------------------------------------|----|
| Figure S1. $^1\text{H}$ NMR spectrum of lopouzanone A (1).....                                       | 4  |
| Figure S2. $^{13}\text{C}$ NMR spectrum of lopouzanone A (1).....                                    | 5  |
| Figure S3. $^1\text{H}$ - $^1\text{H}$ COSY spectrum of lopouzanone A (1).....                       | 6  |
| Figure S4. HMBC spectrum of lopouzanone A (1) .....                                                  | 7  |
| Figure S5. HSQC spectrum of lopouzanone A (1) .....                                                  | 8  |
| Figure S6. ROESY spectrum of lopouzanone A (1) .....                                                 | 9  |
| Figure S7. CD spectrum of lopouzanone A (1).....                                                     | 10 |
| Figure S8. $^1\text{H}$ NMR spectrum for (R)-MTPA esters of lopouzanone A (1) .....                  | 11 |
| Figure S9. $^1\text{H}$ - $^1\text{H}$ COSY spectrum for (R)-MTPA esters of lopouzanone A (1) .....  | 12 |
| Figure S10. $^1\text{H}$ NMR spectrum for (S)-MTPA esters of lopouzanone A (1) .....                 | 13 |
| Figure S11. COSY spectrum for (S)-MTPA esters of lopouzanone A (1) .....                             | 14 |
| Figure S12. $^1\text{H}$ NMR spectrum of lopouzanone B (2).....                                      | 15 |
| Figure S13. $^{13}\text{C}$ NMR spectrum of lopouzanone B (2).....                                   | 16 |
| Figure S14. $^1\text{H}$ - $^1\text{H}$ COSY spectrum of lopouzanone B (2).....                      | 17 |
| Figure S15. HMBC spectrum of lopouzanone B (2) .....                                                 | 18 |
| Figure S16. HSQC spectrum of lopouzanone B (2).....                                                  | 19 |
| Figure S17. ROESY spectrum of lopouzanone B (2) .....                                                | 20 |
| Figure S18. CD spectrum of lopouzanone B (2).....                                                    | 21 |
| Figure S19. $^1\text{H}$ NMR spectrum for (R)-MTPA esters of lopouzanone B (2) .....                 | 22 |
| Figure S20. $^1\text{H}$ - $^1\text{H}$ COSY spectrum for (R)-MTPA esters of lopouzanone B (2) ..... | 23 |
| Figure S21. $^1\text{H}$ NMR spectrum for (S)-MTPA esters of lopouzanone B (2).....                  | 24 |
| Figure S22. $^1\text{H}$ - $^1\text{H}$ COSY spectrum for (S)-MTPA esters of lopouzanone B (2).....  | 25 |
| Figure S23. $^1\text{H}$ NMR spectrum of gliorosein (3) .....                                        | 26 |
| Figure S24. $^{13}\text{C}$ NMR spectrum of gliorosein (3) .....                                     | 27 |
| Figure S25. CD spectrum of gliorosein (3).....                                                       | 28 |
| Figure S26. $^1\text{H}$ NMR spectrum of balticolid (4) .....                                        | 29 |
| Figure S27. $^{13}\text{C}$ NMR spectrum of balticolid (4) .....                                     | 30 |
| Figure S28. $^1\text{H}$ NMR spectrum of dendrodolide G (5) .....                                    | 31 |
| Figure S29. $^{13}\text{C}$ NMR spectrum of dendrodolide G (5) .....                                 | 32 |
| Figure S30. $^1\text{H}$ NMR spectrum of dihydroisocoumarine (6) .....                               | 33 |
| Figure S31. $^{13}\text{C}$ NMR spectrum of dihydroisocoumarine (6) .....                            | 34 |
| Figure S32. $^1\text{H}$ NMR spectrum of (–)-5-methylmellein (7).....                                | 35 |
| Figure S33. $^{13}\text{C}$ NMR spectrum of (–)-5-methylmellein (7).....                             | 36 |

|                                                                                 |    |
|---------------------------------------------------------------------------------|----|
| Figure S34. $^1\text{H}$ NMR spectrum of dendrodochol B (8) .....               | 37 |
| Figure S35. $^{13}\text{C}$ NMR spectrum of dendrodochol B (8) .....            | 38 |
| Figure S36. $^1\text{H}$ NMR spectrum of 1-O-acetyldendrodochol B (9) .....     | 39 |
| Figure S37. $^{13}\text{C}$ NMR spectrum of 1-O-acetyldendrodochol B (9) .....  | 46 |
| Figure S38. $^1\text{H}$ - $^1$ spectrum of 1-O-acetyldendrodochol B (9).....   | 47 |
| Figure S39. HMBC spectrum of 1-O-acetyldendrodochol B (9).....                  | 48 |
| Figure S40. HSQC spectrum of 1-O-acetyldendrodochol B (9).....                  | 49 |
| Figure S41. CD spectrum of 1-O-acetyldendrodochol B (9).....                    | 50 |
| Figure S42. $^1\text{H}$ NMR spectrum of 2-O-acetyldendrodochol B (10) .....    | 51 |
| Figure S43. $^{13}\text{C}$ NMR spectrum of 2-O-acetyldendrodochol B (10) ..... | 58 |
| Figure S44. HMBC spectrum of 2-O-acetyldendrodochol B (10).....                 | 59 |
| Figure S45. HSQC spectrum of 2-O-acetyldendrodochol B (10).....                 | 60 |
| Figure S46. HR (+)ESI MS spectrum of lopouzanone A (1).....                     | 61 |
| Figure S47. HR (+)ESI MS spectrum of lopouzanone B (2).....                     | 61 |
| Figure S48. HR (+)ESI MS spectrum of dendrodochol B (8) .....                   | 62 |
| Figure S49. HR (+)ESI MS spectrum of 1-O-acetyldendrodochol B (9) .....         | 62 |
| Figure S50. HR (+)ESI MS spectrum of 2-O-acetyldendrodochol B (10) .....        | 62 |

Figure S1.  $^1\text{H}$  NMR spectrum of lopouzanone A (1)

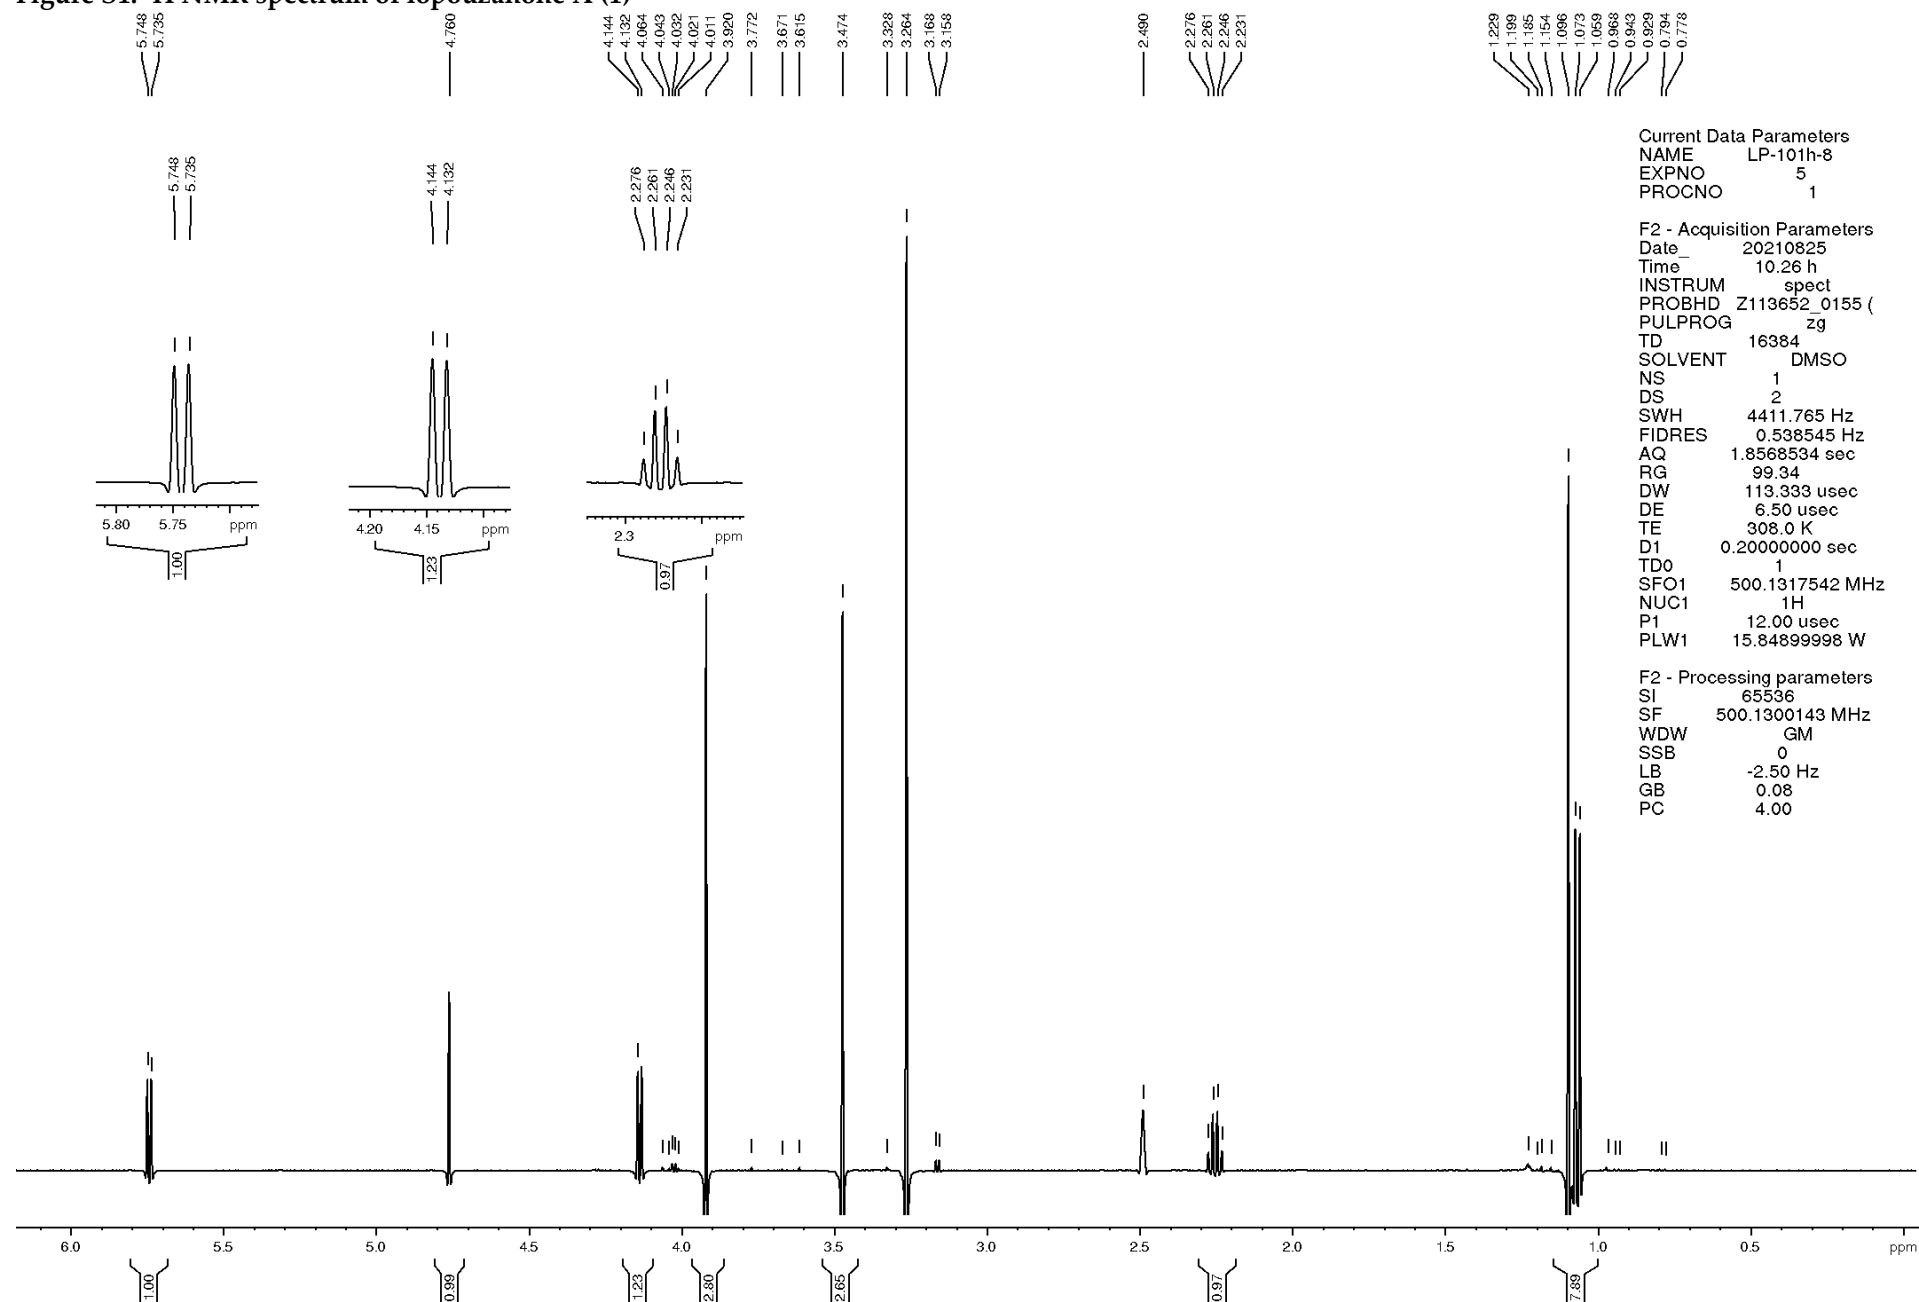

Figure S2.  $^{13}\text{C}$  NMR spectrum of lopouzanone A (1)

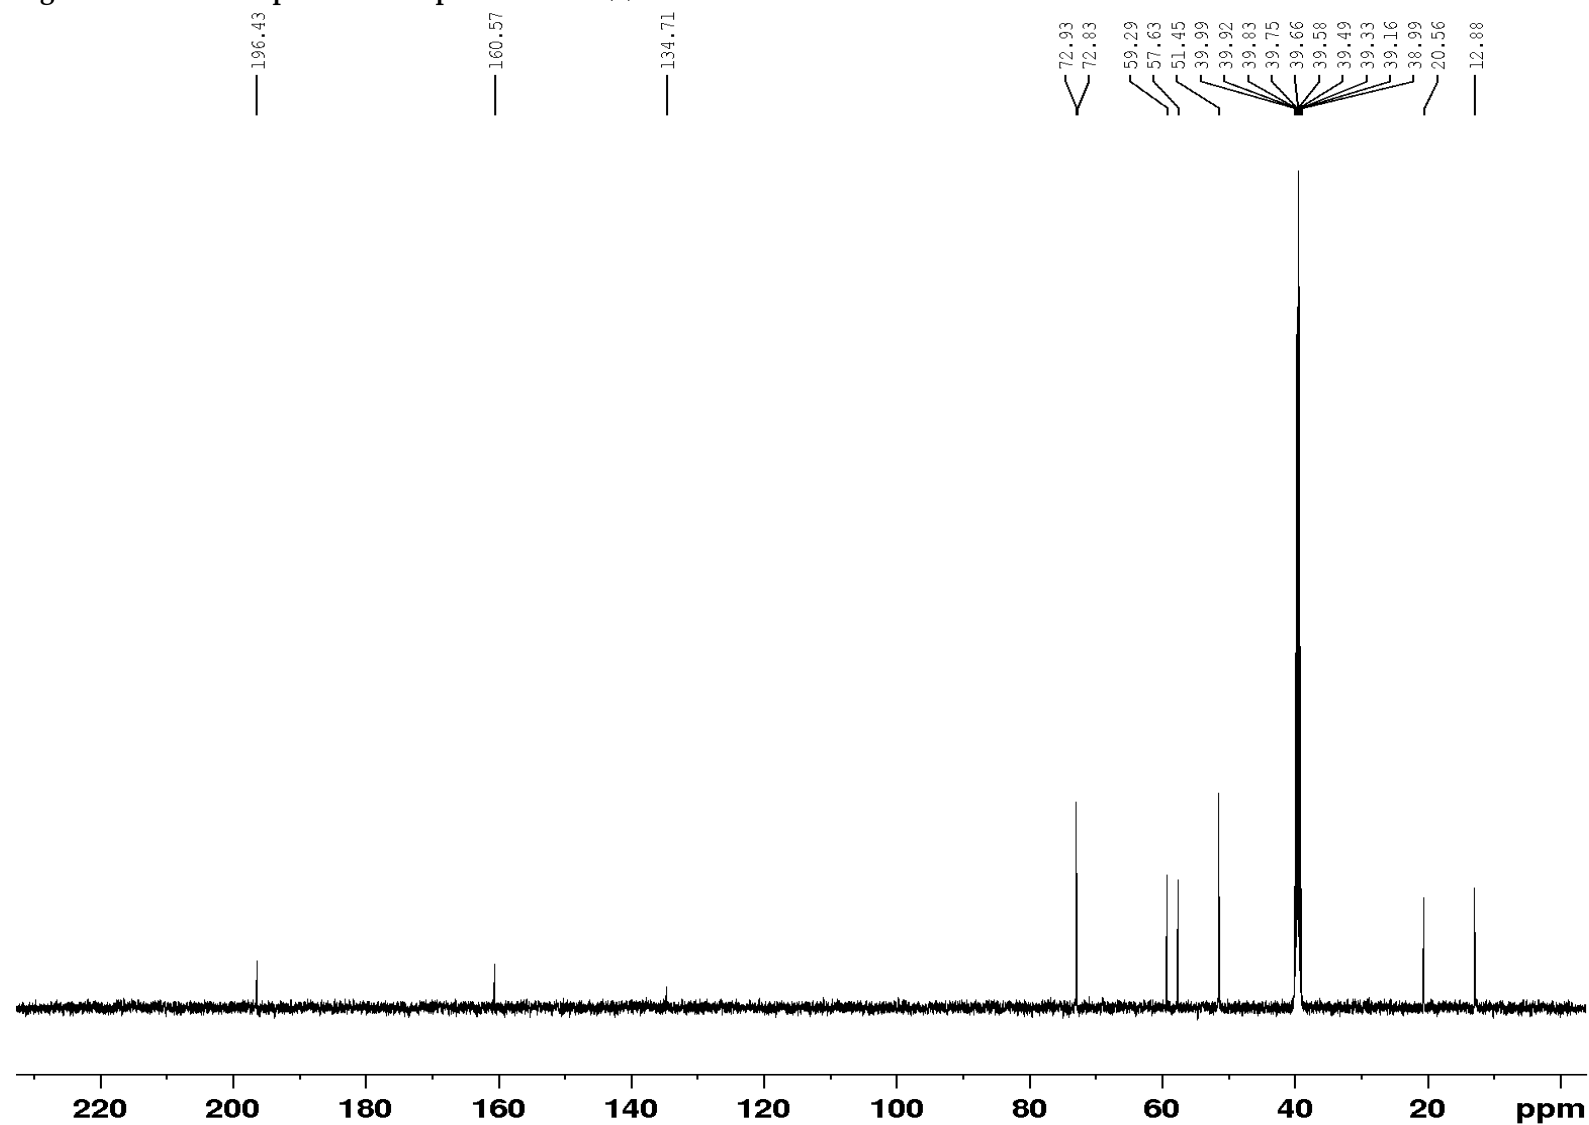

```

Current Data Parameters
NAME          LP-101h-8
EXPNO         11
PROCNO        1

F2 - Acquisition Parameters
Date_         20210825
Time          10.26 h
INSTRUM       spect
PROBHD        Z113652_0155 (
PULPROG       zgpg
TD            32768
SOLVENT       DMSO
NS            331
DS            4
SWH           29761.904 Hz
FIDRES        1.816522 Hz
AQ            0.5505024 sec
RG            196.84
DW            16.800 usec
DE            6.50 usec
TE            308.1 K
D1            2.00000000 sec
D11           0.03000000 sec
TD0           4096
SFO1          125.7722512 MHz
NUC1          13C
P1            11.88 usec
PLW1          79.43299866 W
SFO2          500.1320005 MHz
NUC2          1H
CPDPRG[2     waltz16
PCPD2         80.00 usec
PLW2          15.84899998 W
PLW12         0.35659999 W
PLW13         0.17937000 W

F2 - Processing parameters
SI            65536
SF            125.7578629 MHz
WDW           EM
SSB           0
LB            2.00 Hz
GB            0
PC            1.30
    
```

Figure S3.  $^1\text{H}$ - $^1\text{H}$  COSY spectrum of lopouzanone A (1)

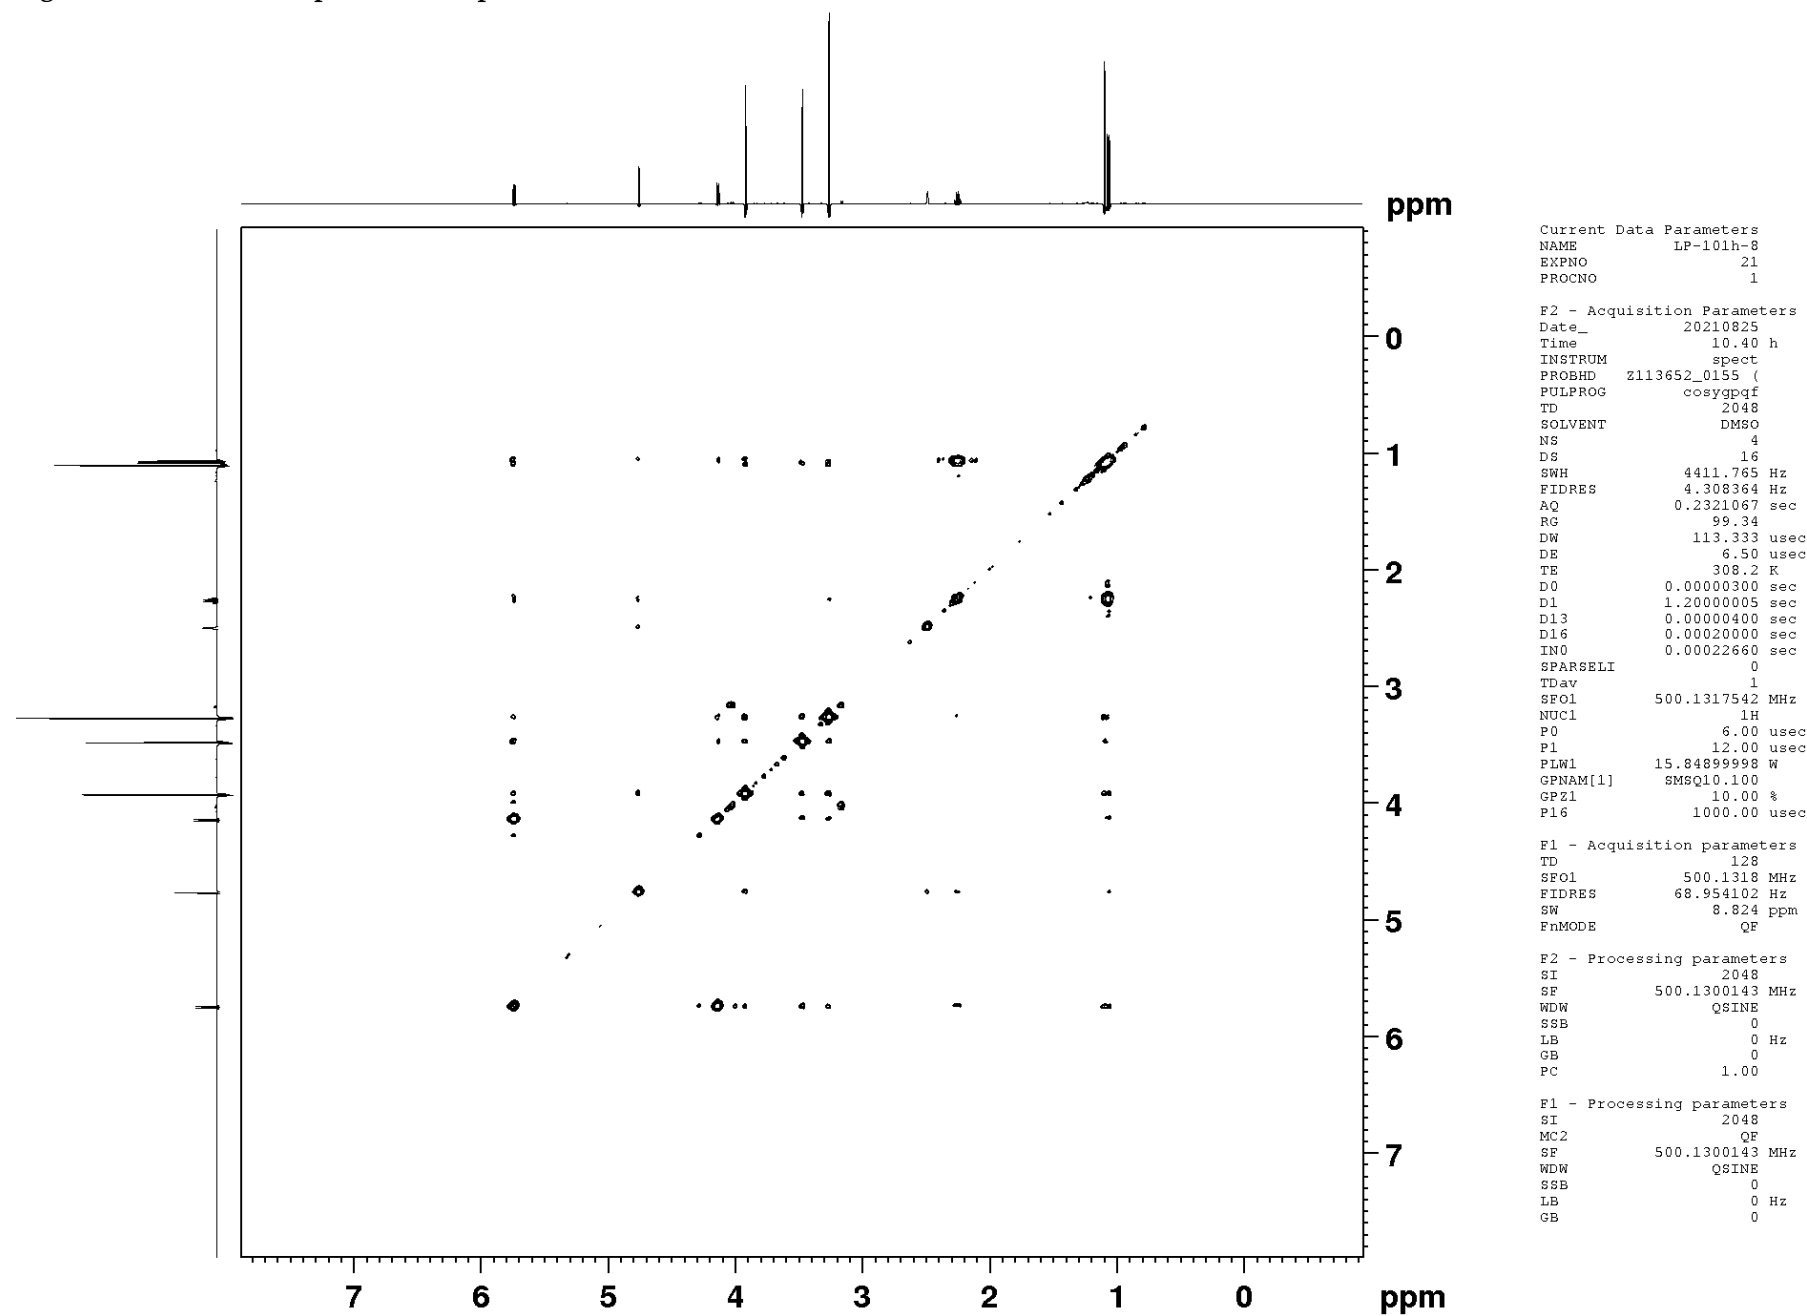

Figure S4. HMBC spectrum of lopouzanone A (1)

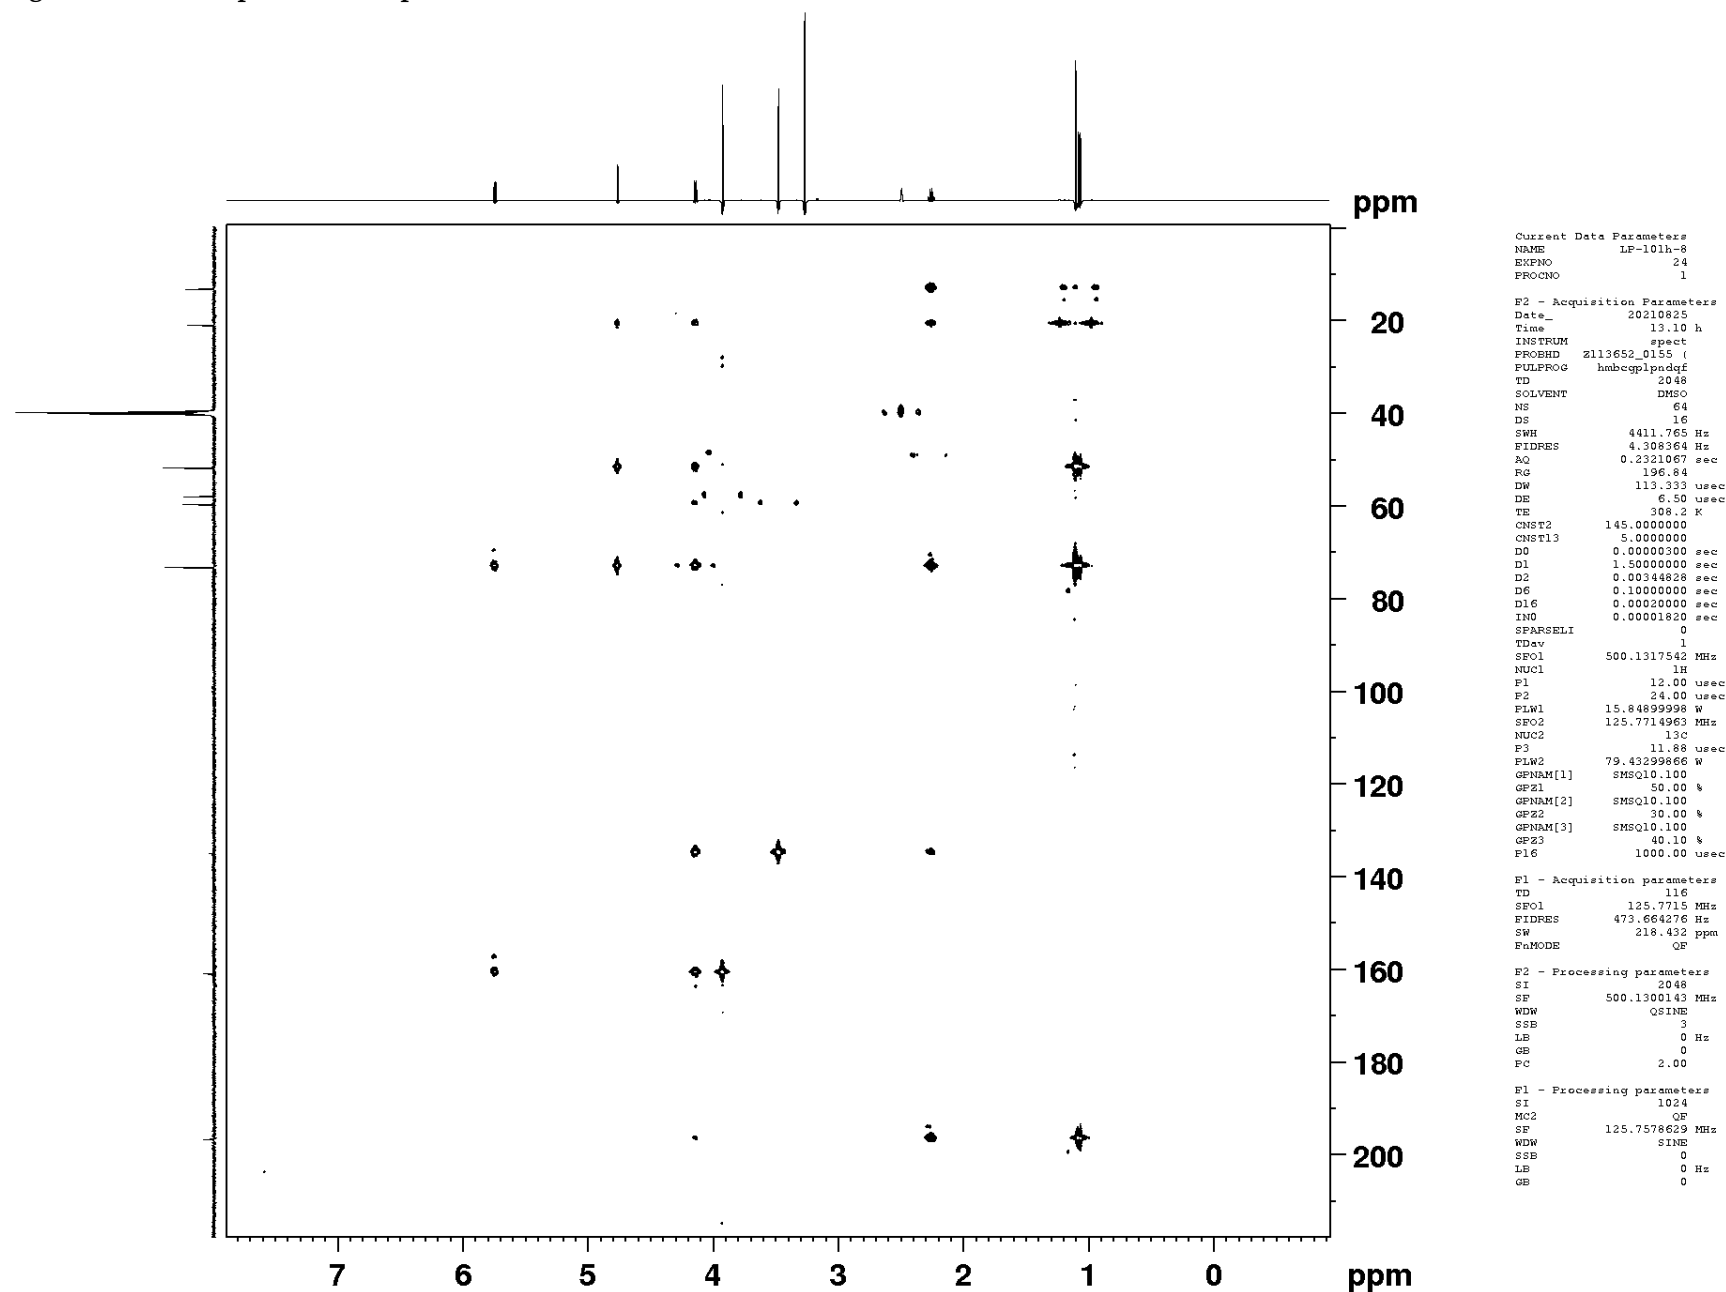

Figure S5. HSQC spectrum of lopouzanone A (1)

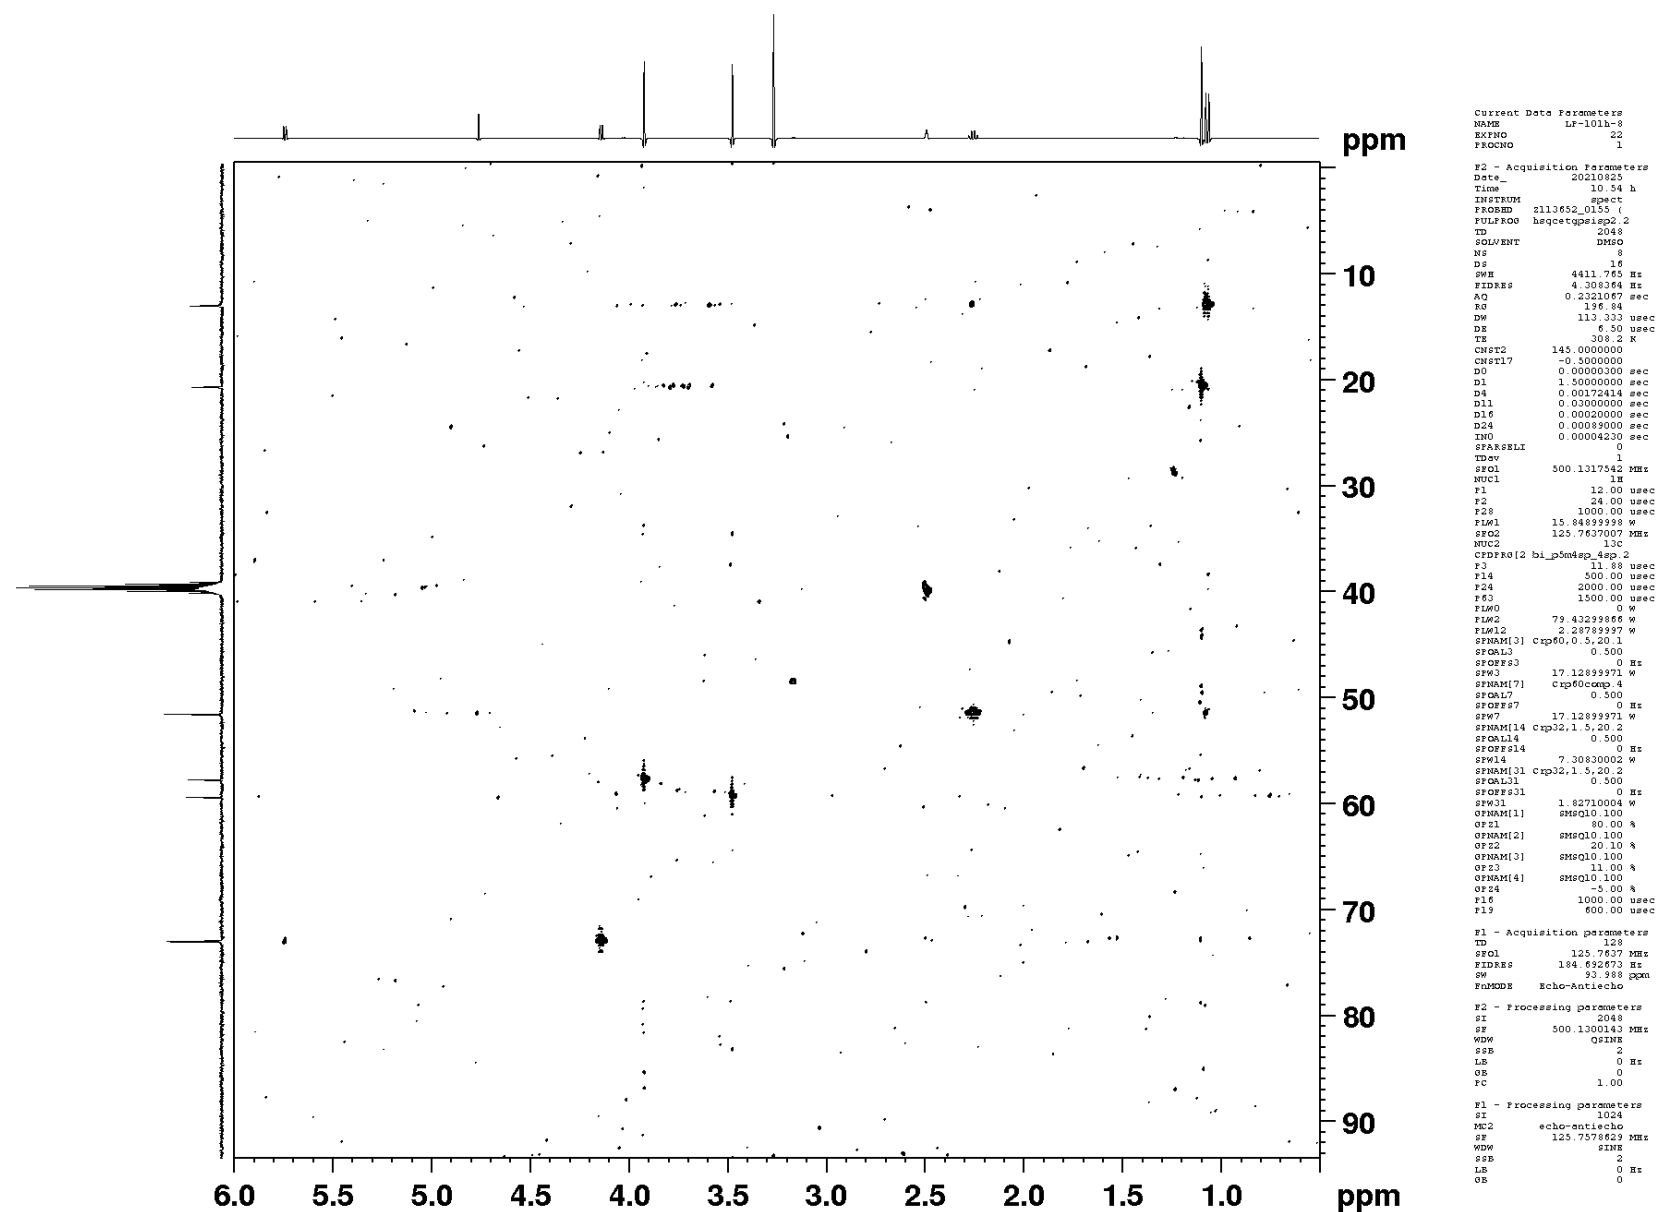



Figure S6. ROESY spectrum of lopouzanone A (1)

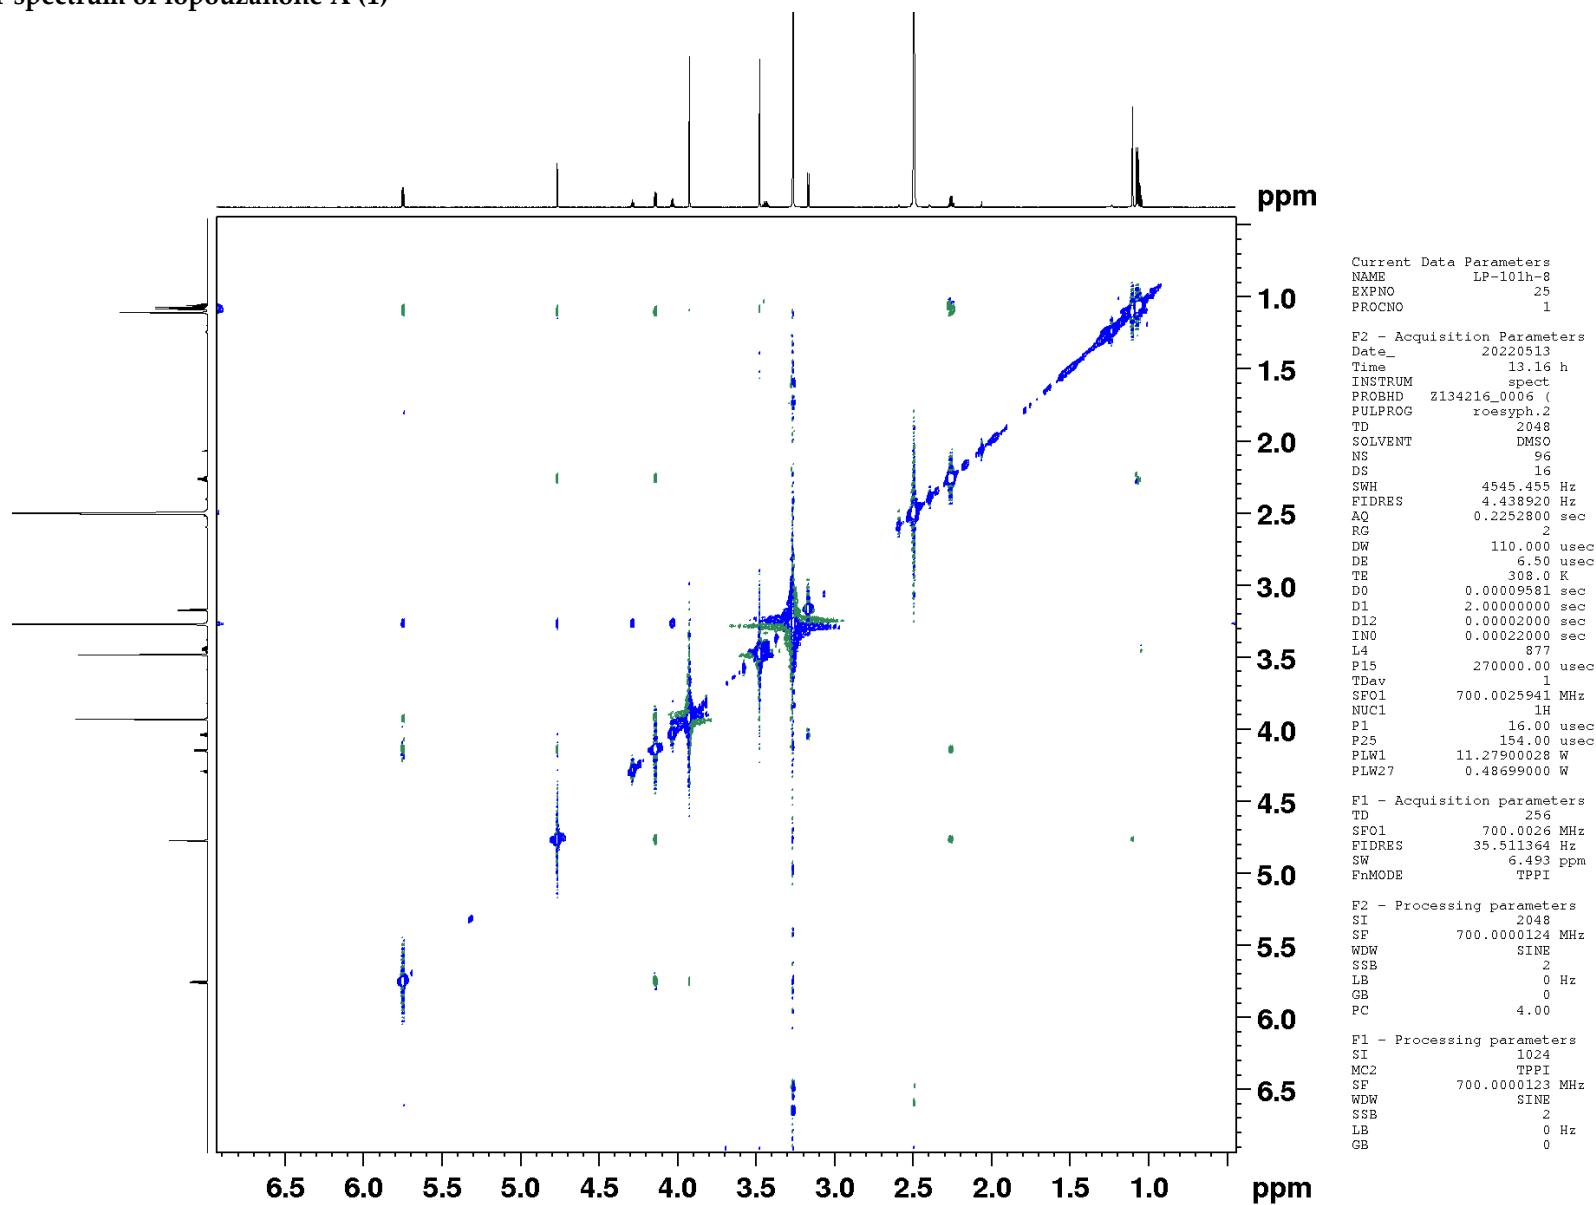

Figure S7. CD spectrum of lopouzanone A (1)

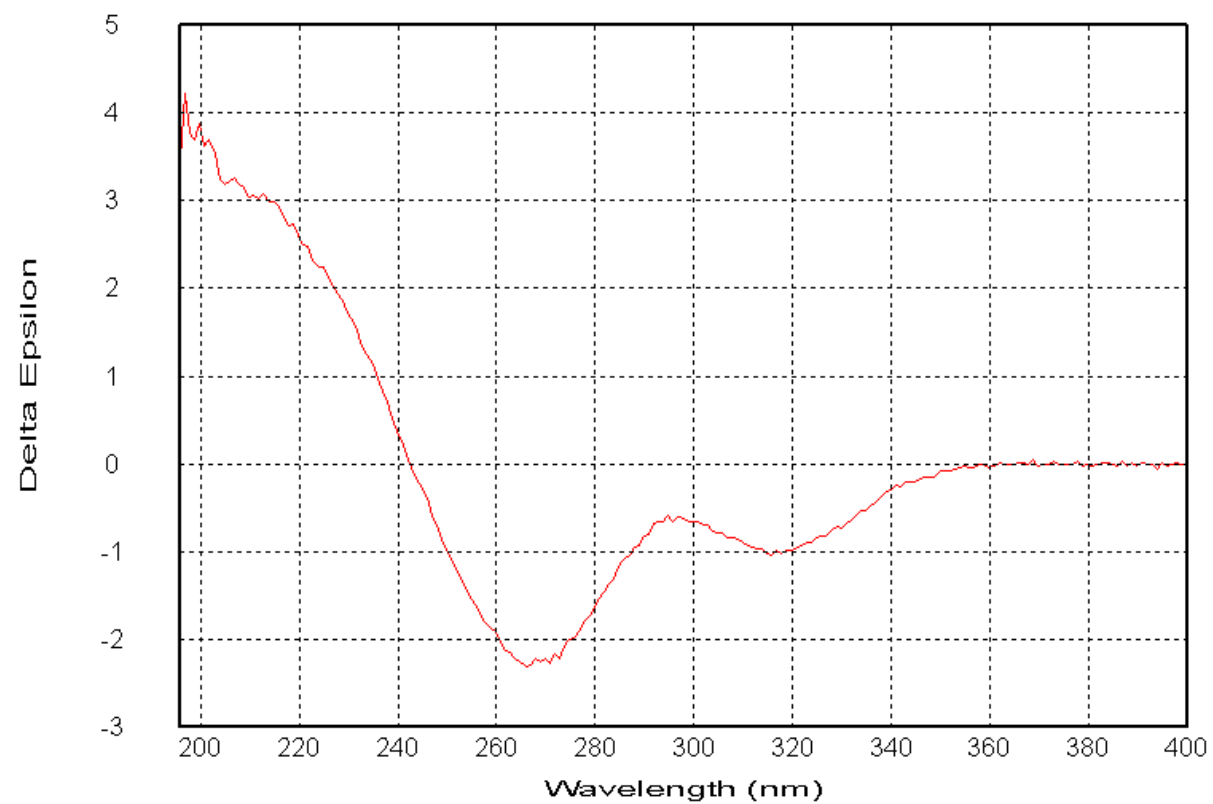

Figure S8. <sup>1</sup>H NMR spectrum for (R)-MTPA esters of lopouzanone A (**1**)

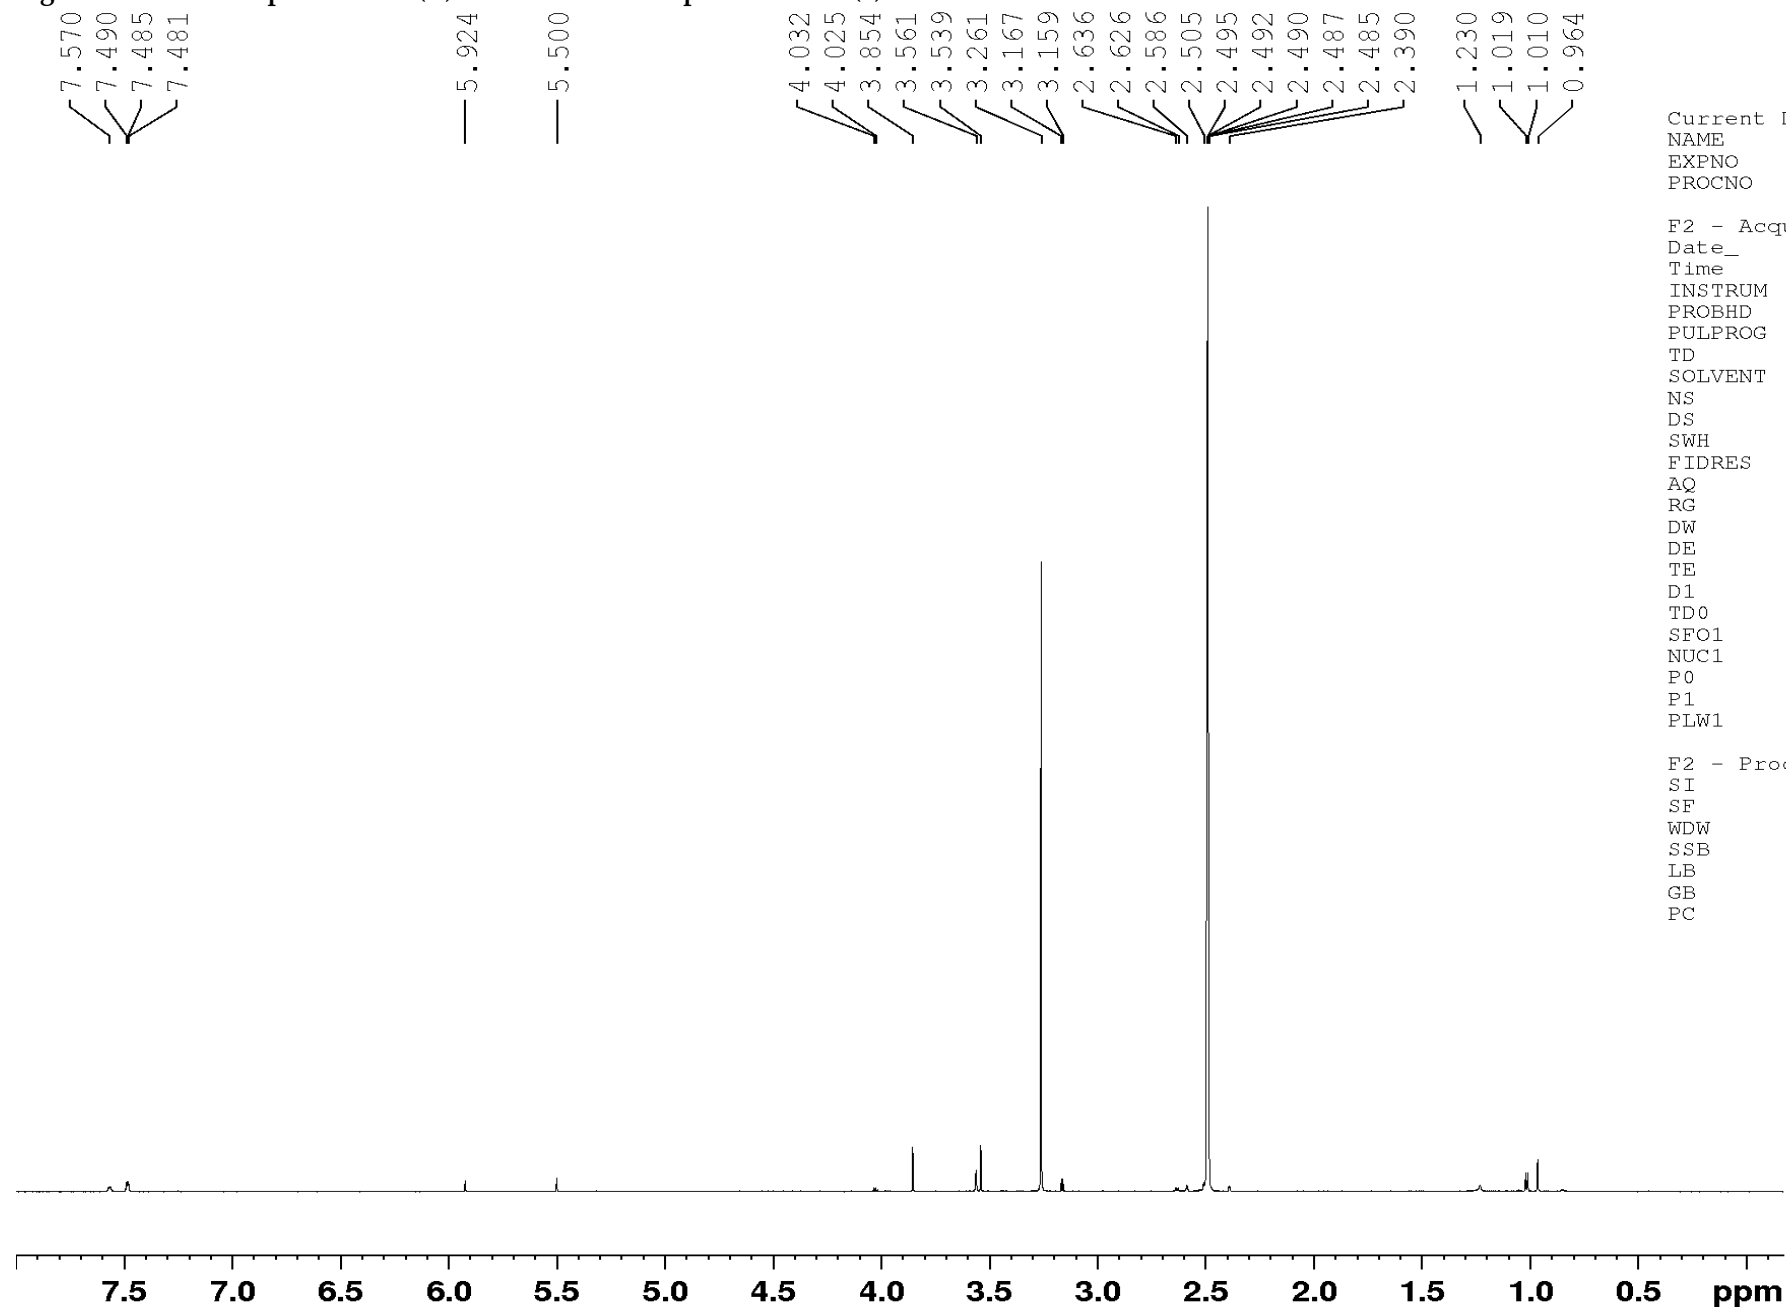

Current Data Parameters  
NAME LP-101h-8-R  
EXPNO 1  
PROCNO 1

F2 - Acquisition Parameters  
Date\_ 20220429  
Time 11.36 h  
INSTRUM spect  
PROBHD Z134216\_0006 (   
PULPROG zg30  
TD 32768  
SOLVENT DMSO  
NS 8  
DS 2  
SWH 9803.922 Hz  
FIDRES 0.598384 Hz  
AQ 1.6711680 sec  
RG 150.24  
DW 51.000 usec  
DE 6.50 usec  
TE 308.0 K  
D1 0 sec  
TD0 1  
SFO1 700.0041374 MHz  
NUC1 1H  
P0 5.33 usec  
P1 16.00 usec  
PLW1 11.27900028 W

F2 - Processing parameters  
SI 32768  
SF 700.0000128 MHz  
WDW EM  
SSB 0  
LB 0.10 Hz  
GB 0  
PC 4.00

Figure S9.  $^1\text{H}$ - $^1\text{H}$  COSY spectrum for (R)-MTPA esters of lopouzanone A (1)

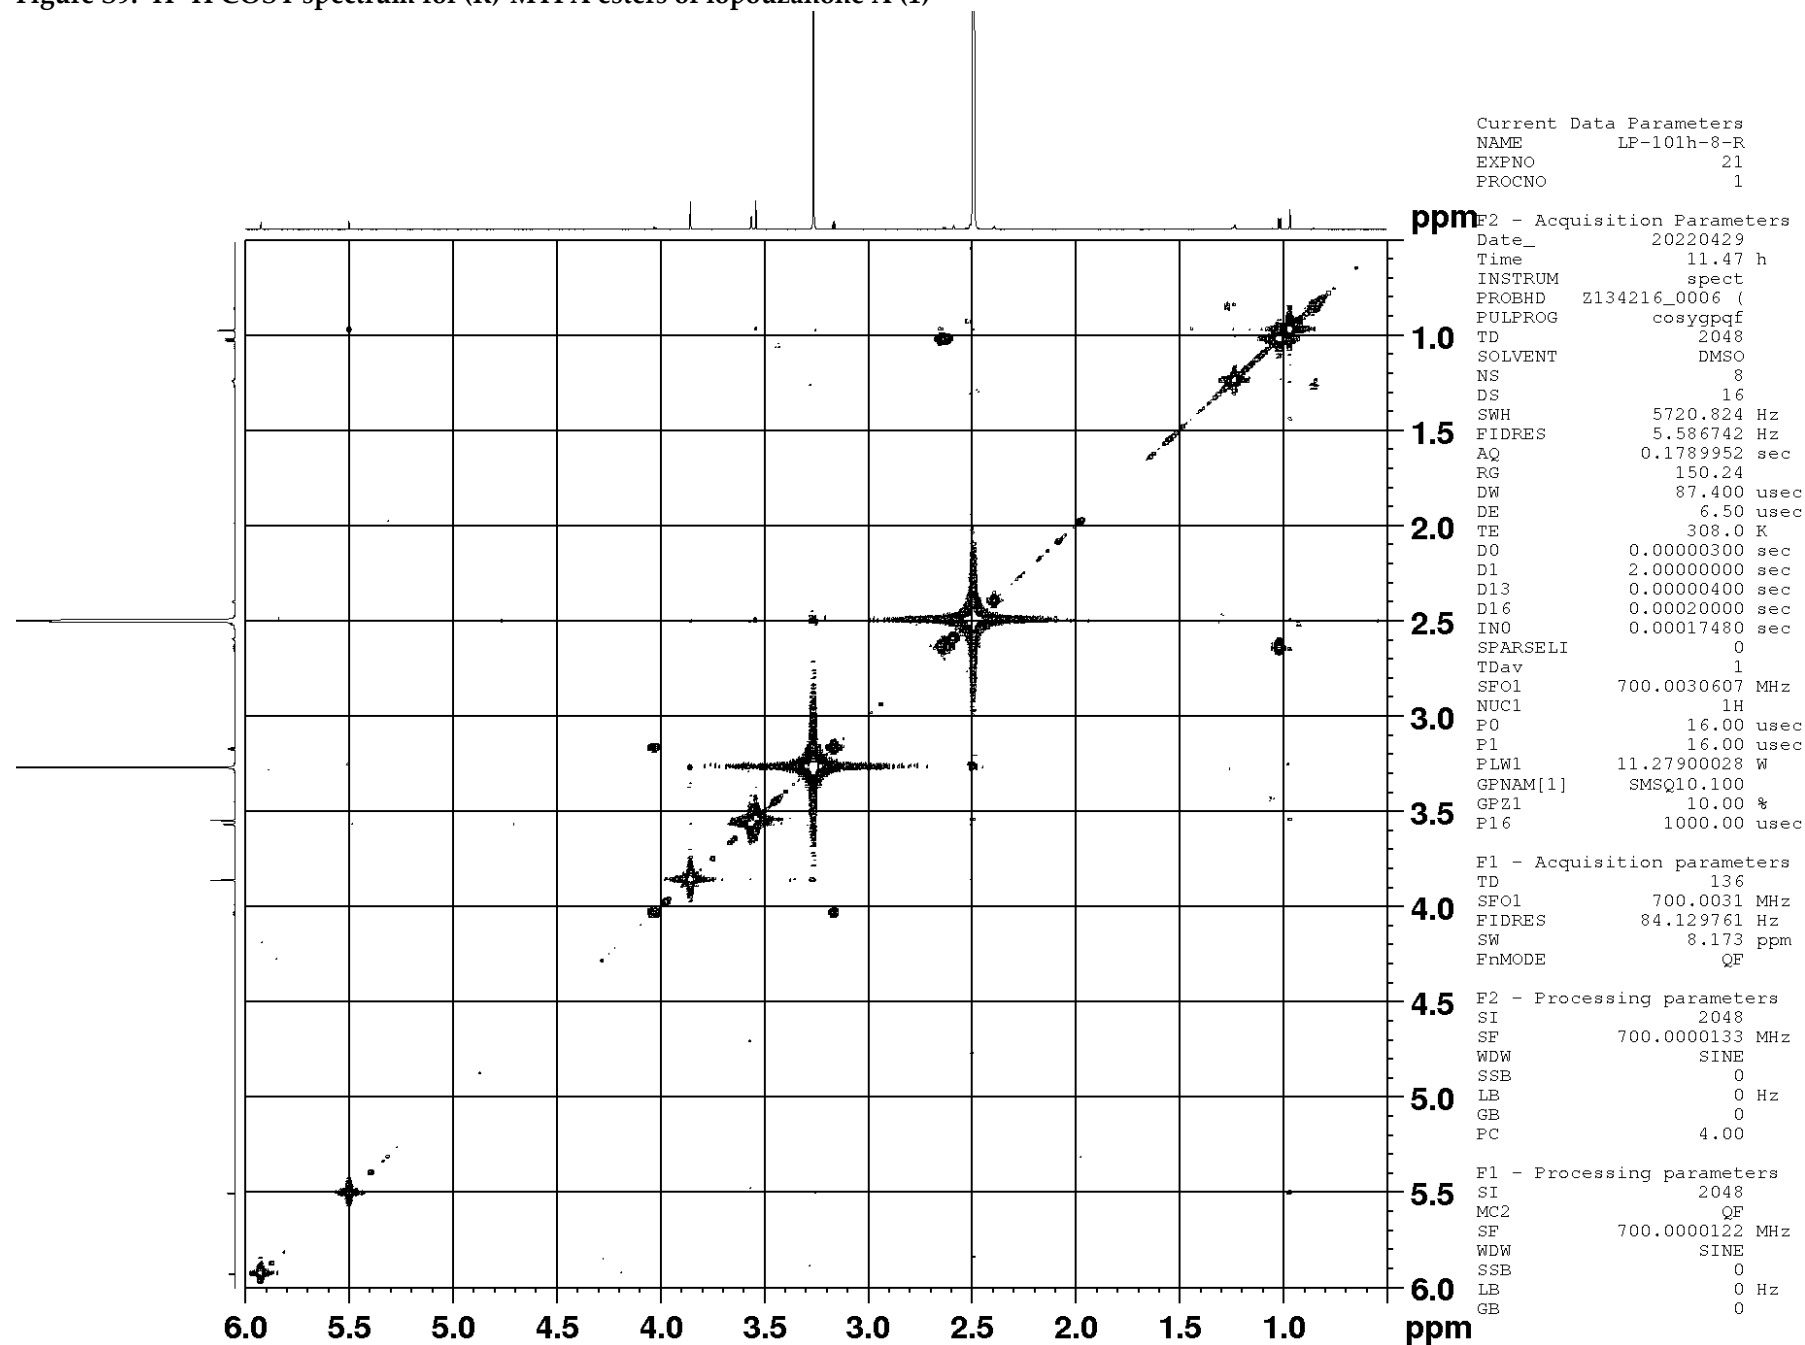

Figure S10. <sup>1</sup>H NMR spectrum for (S)-MTPA esters of lopouzanone A (1)

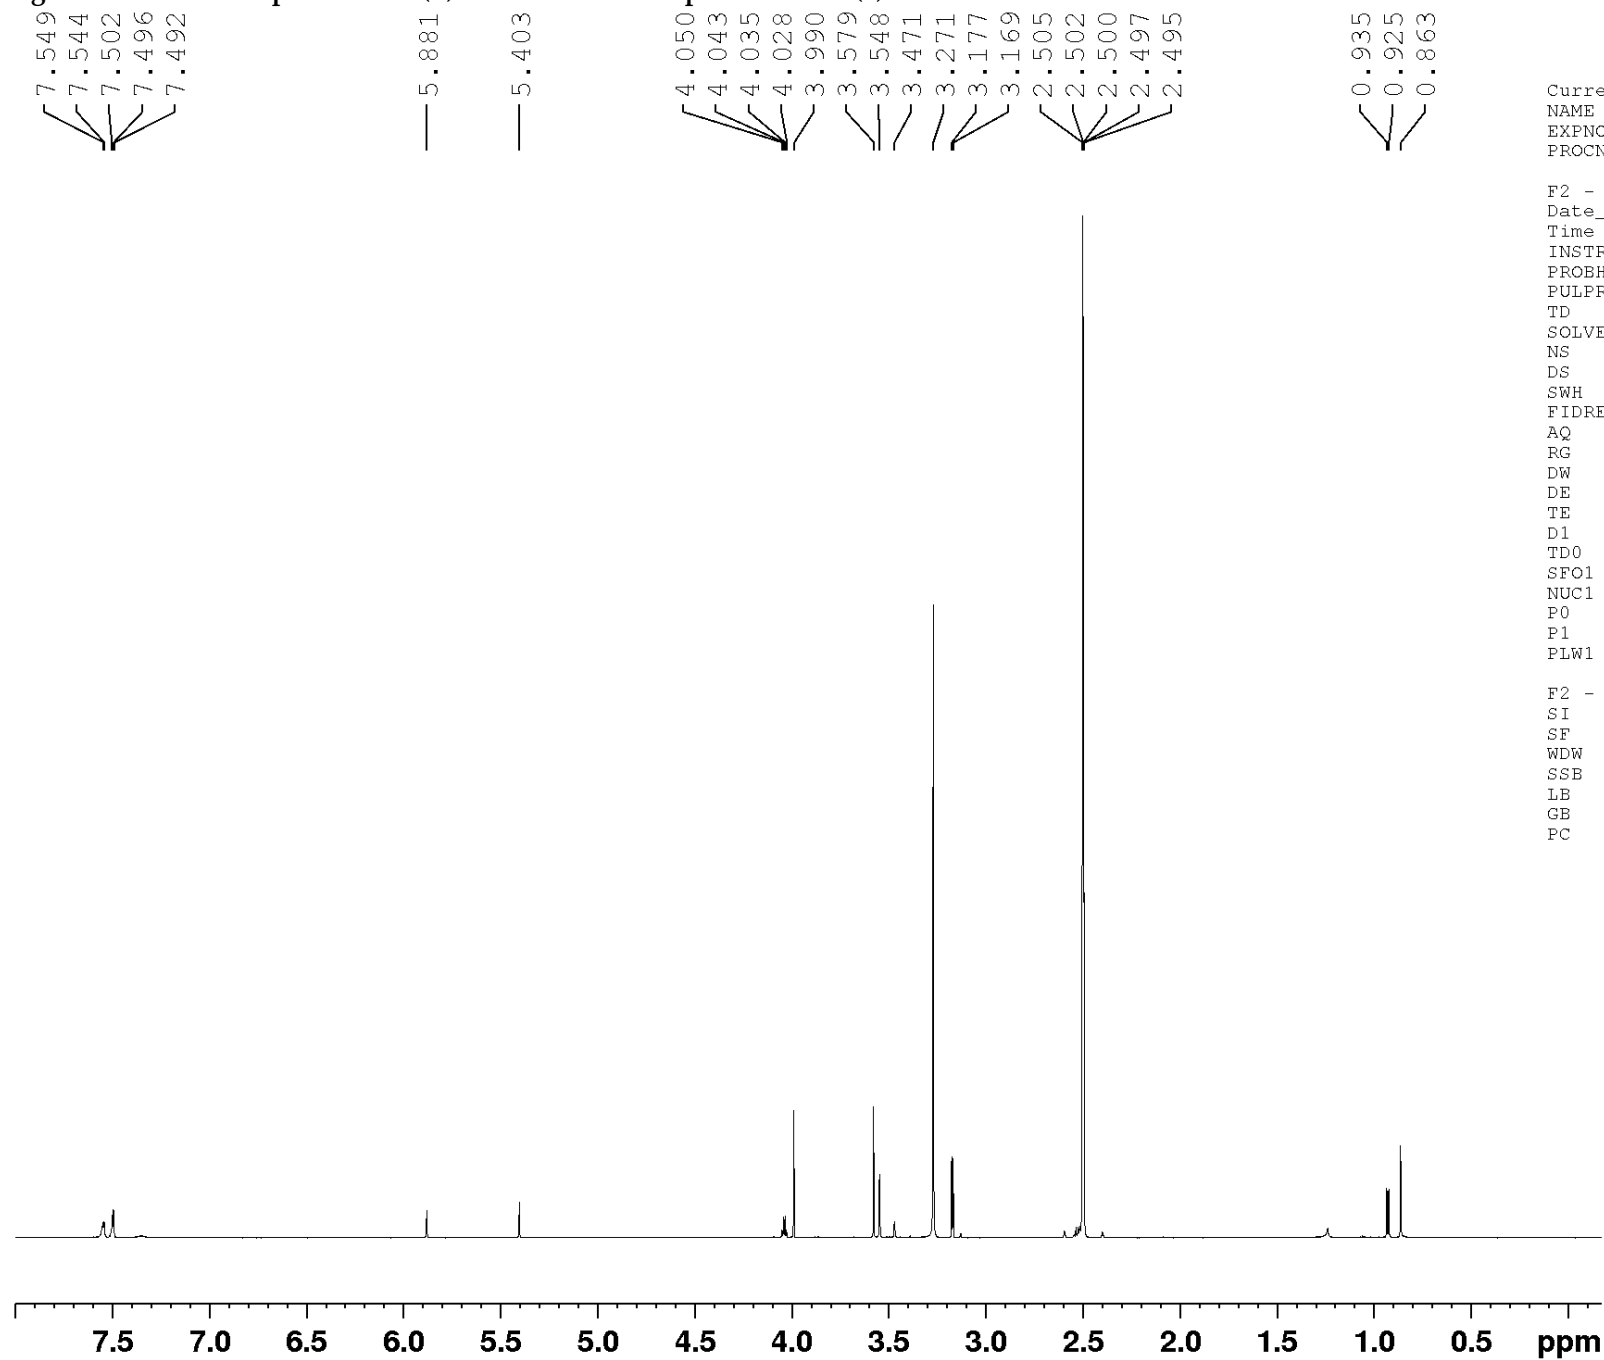

Current Data Parameters  
NAME LP-101h-8-S  
EXPNO 3  
PROCNO 1

F2 - Acquisition Parameters  
Date\_ 20220429  
Time 9.19 h  
INSTRUM spect  
PROBHD Z134216\_0006 (   
PULPROG zg30  
TD 32768  
SOLVENT DMSO  
NS 16  
DS 2  
SWH 9803.922 Hz  
FIDRES 0.598384 Hz  
AQ 1.6711680 sec  
RG 150.24  
DW 51.000 usec  
DE 6.50 usec  
TE 308.0 K  
D1 0 sec  
TD0 1  
SFO1 700.0041374 MHz  
NUC1 1H  
P0 5.33 usec  
P1 16.00 usec  
PLW1 11.27900028 W

F2 - Processing parameters  
SI 32768  
SF 700.0000058 MHz  
WDW EM  
SSE 0  
LB 0.10 Hz  
GB 0  
PC 4.00

Figure S11. COSY spectrum for (S)-MTPA esters of lopouzanone A (1)

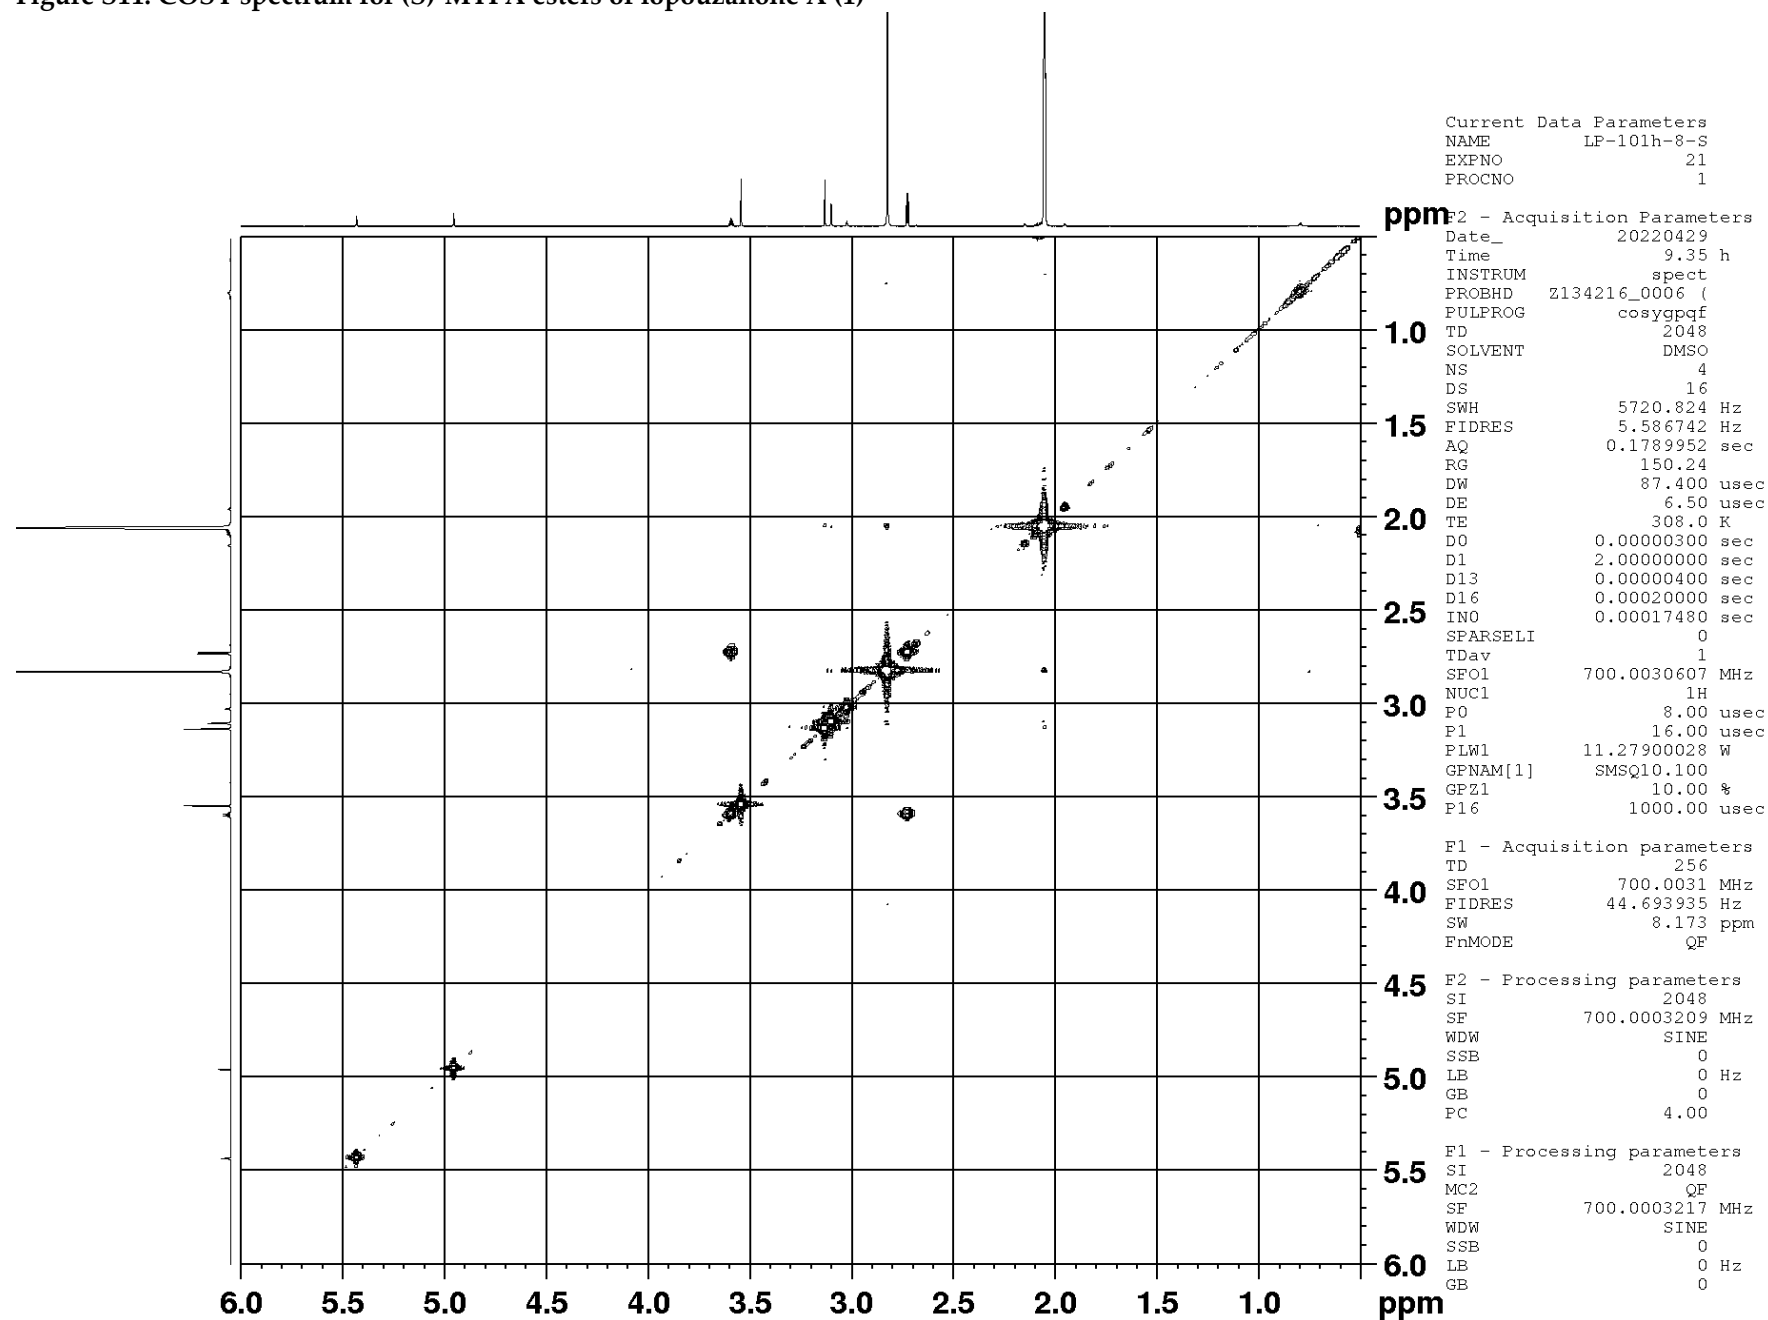

Figure S12.  $^1\text{H}$  NMR spectrum of lopouzanone B (2)

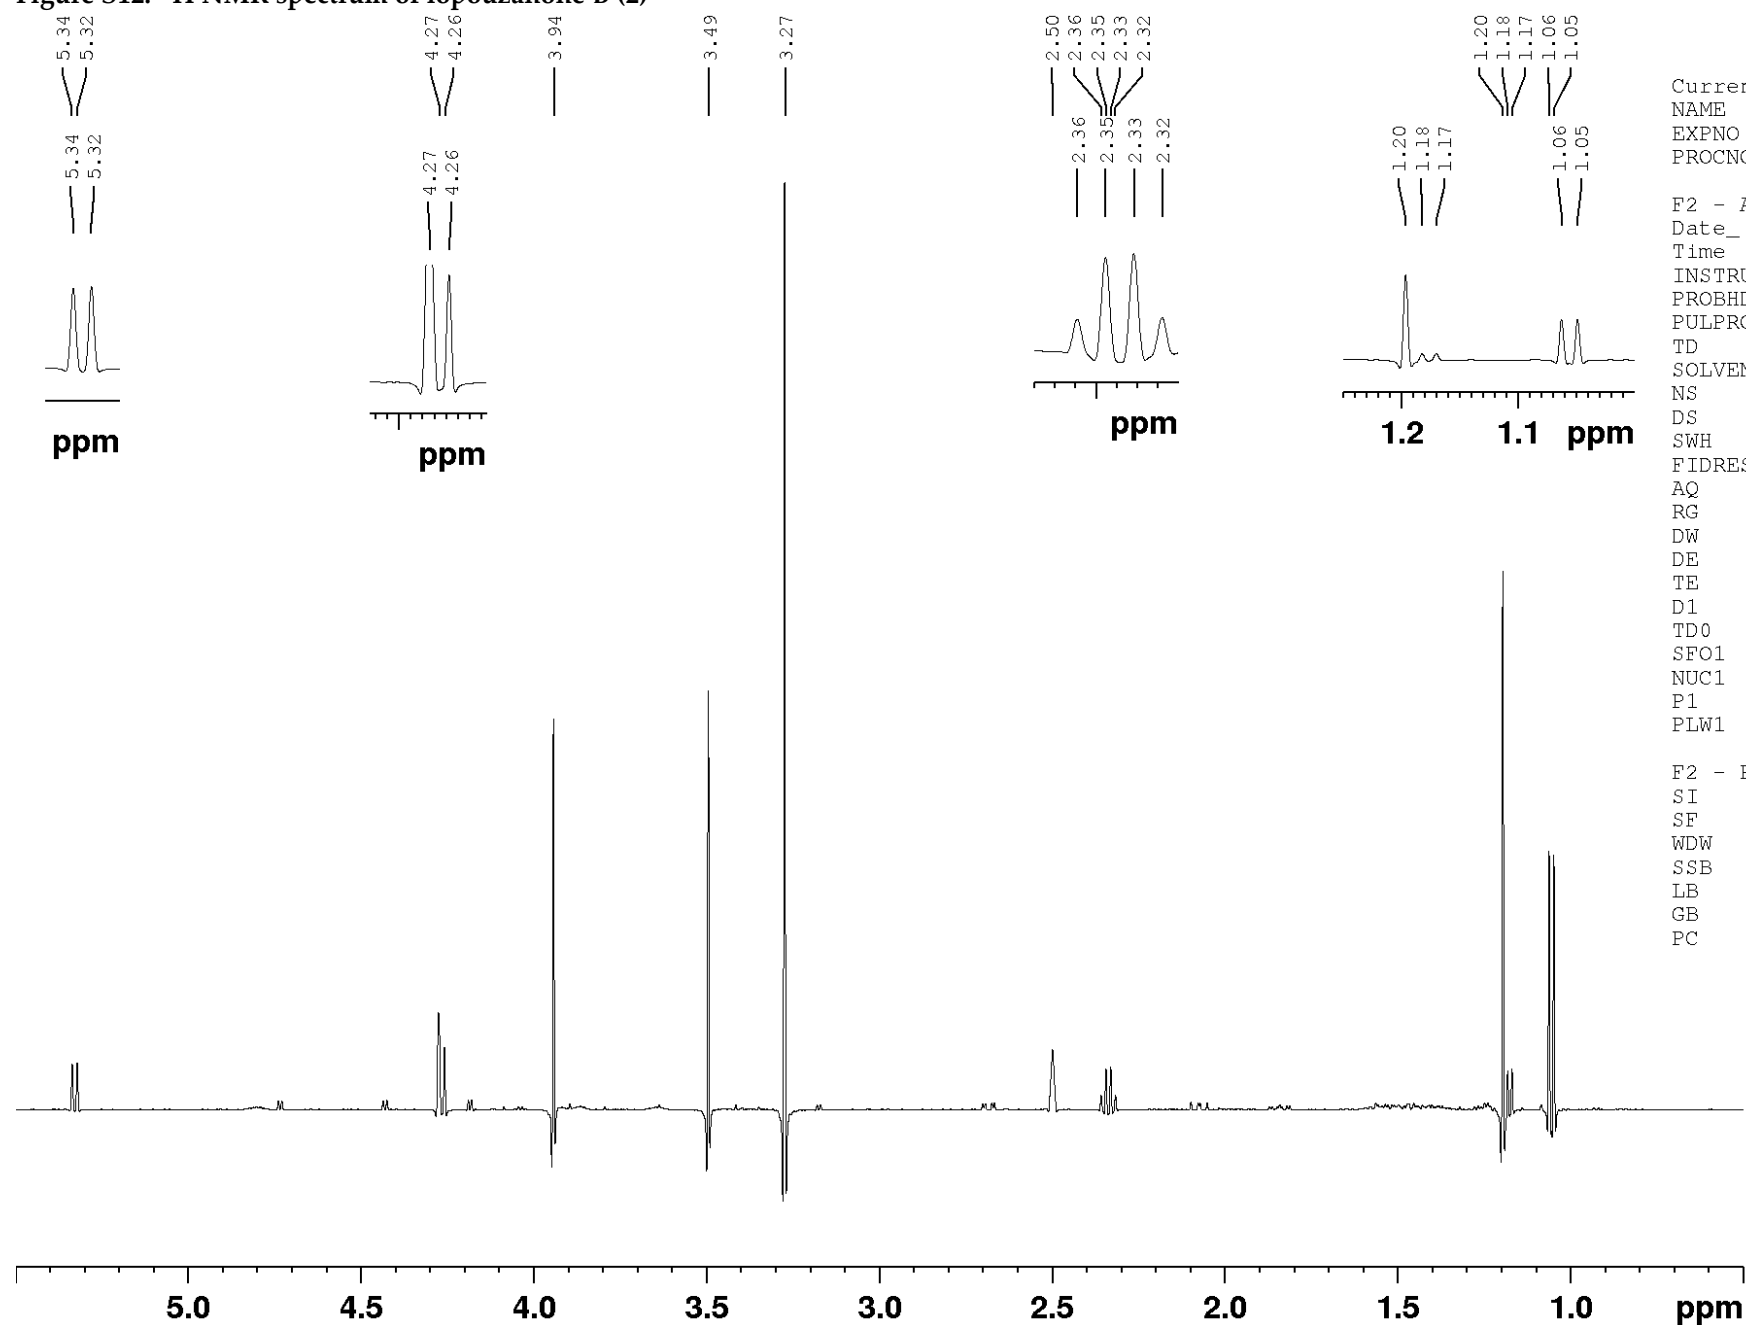

Current Data Parameters  
 NAME LP-100h-6  
 EXPNO 5  
 PROCNO 1

F2 - Acquisition Parameters  
 Date\_ 20210824  
 Time 11.32 h  
 INSTRUM spect  
 PROBHD Z113652\_0155 (   
 PULPROG zg  
 TD 16384  
 SOLVENT DMSO  
 NS 1  
 DS 2  
 SWH 4076.087 Hz  
 FIDRES 0.497569 Hz  
 AQ 2.0097706 sec  
 RG 99.34  
 DW 122.667 usec  
 DE 6.50 usec  
 TE 308.2 K  
 D1 0.20000000 sec  
 TD0 1  
 SFO1 500.1316080 MHz  
 NUC1  $^1\text{H}$   
 P1 12.00 usec  
 PLW1 15.84899998 W

F2 - Processing parameters  
 SI 65536  
 SF 500.1300090 MHz  
 WDW GM  
 SSB 0  
 LB -2.50 Hz  
 GB 0.08  
 PC 4.00

Figure S13.  $^{13}\text{C}$  NMR spectrum of lopouzanone B (2)

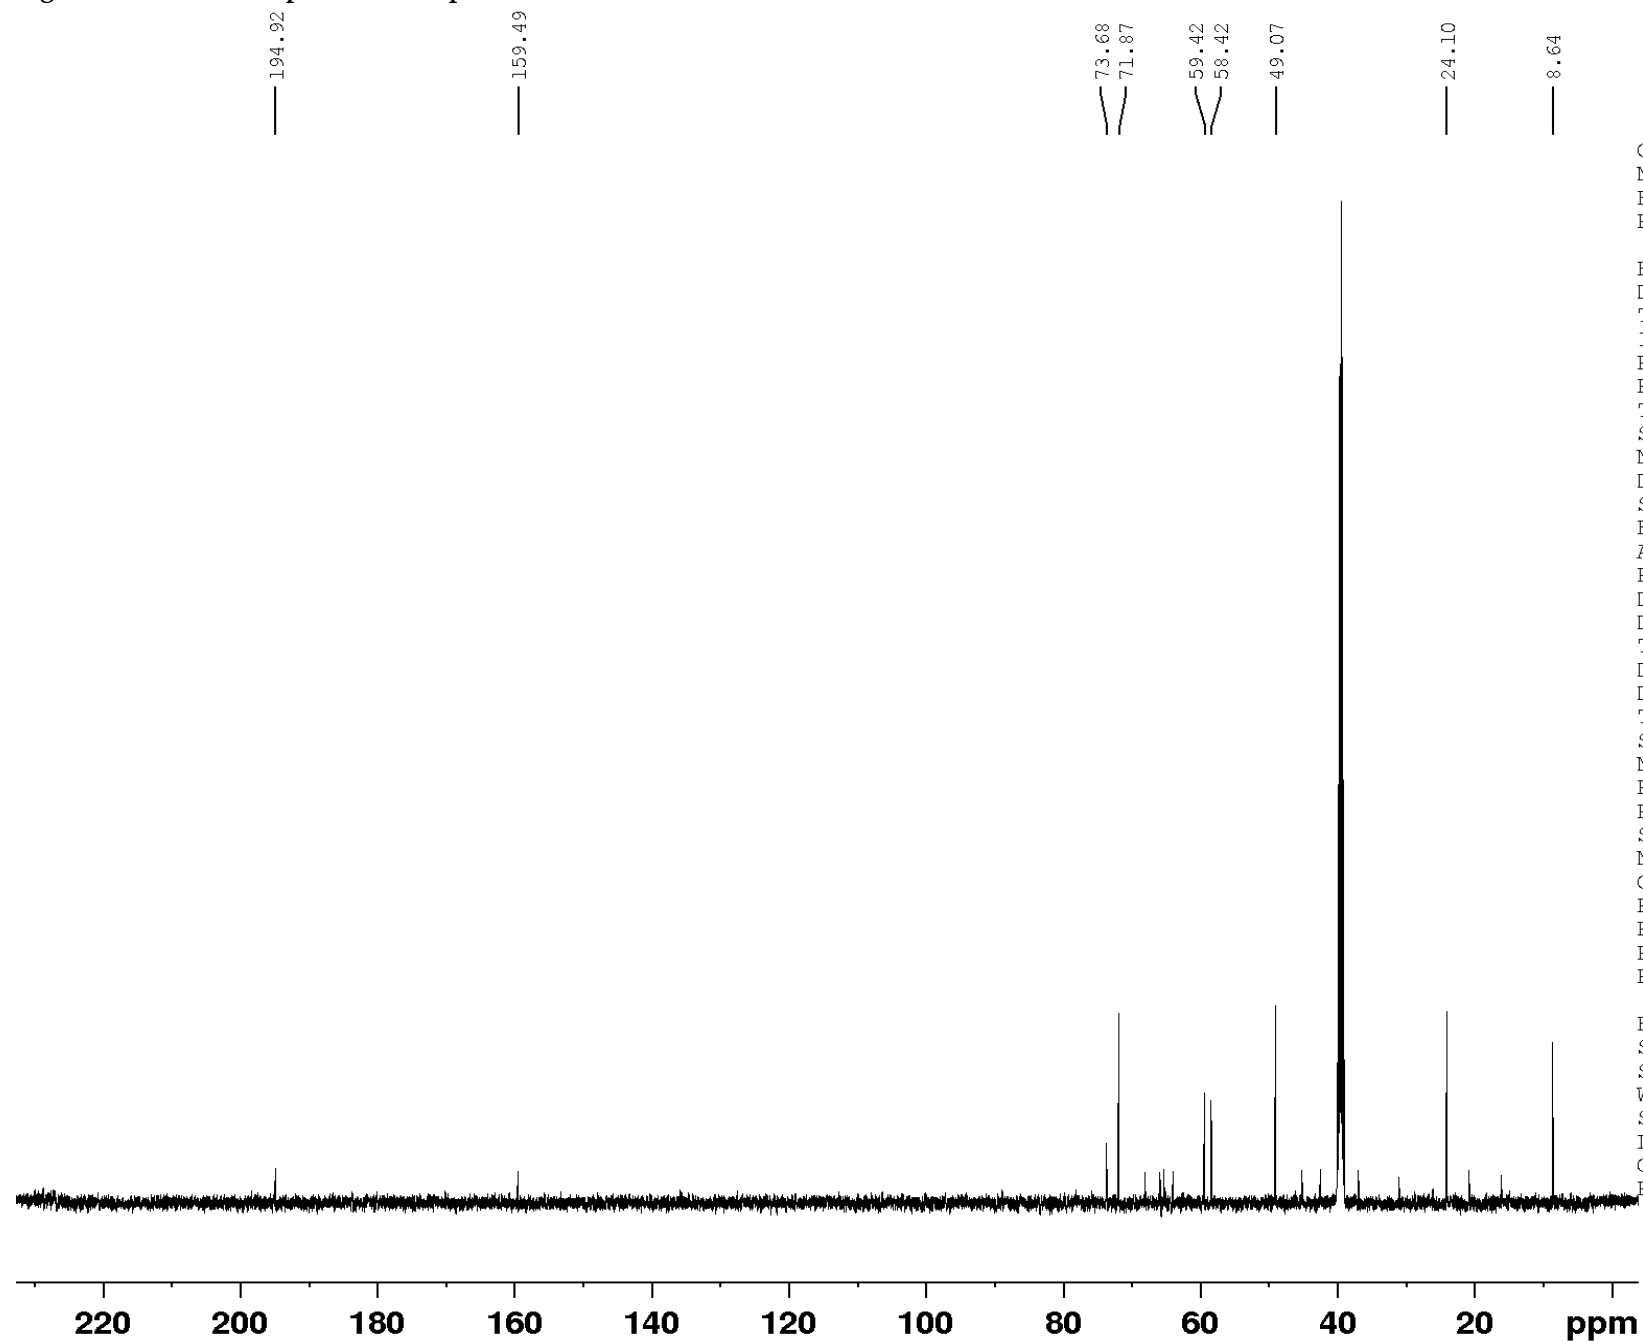

Current Data Parameters  
NAME LP-100h-6  
EXPNO 11  
PROCNO 1

F2 - Acquisition Parameters  
Date\_ 20210824  
Time 11.50 h  
INSTRUM spect  
PROBHD Z113652\_0155 (  
PULPROG zgpg  
TD 32768  
SOLVENT DMSO  
NS 352  
DS 4  
SWH 29761.904 Hz  
FIDRES 1.816522 Hz  
AQ 0.5505024 sec  
RG 196.84  
DW 16.800 usec  
DE 6.50 usec  
TE 308.1 K  
D1 2.00000000 sec  
D11 0.03000000 sec  
TD0 4096  
SFO1 125.7722512 MHz  
NUC1 13C  
P1 11.88 usec  
PLW1 79.43299866 W  
SFO2 500.1320005 MHz  
NUC2 1H  
CPDPRG[2] waltz16  
PCPD2 80.00 usec  
PLW2 15.84899998 W  
PLW12 0.35659999 W  
PLW13 0.17937000 W

F2 - Processing parameters  
SI 65536  
SF 125.7578629 MHz  
WDW EM  
SSB 0  
LB 2.00 Hz  
GB 0  
PC 1.30



Figure S14.  $^1\text{H}$ - $^1\text{H}$  COSY spectrum of lopouzanone B (2)

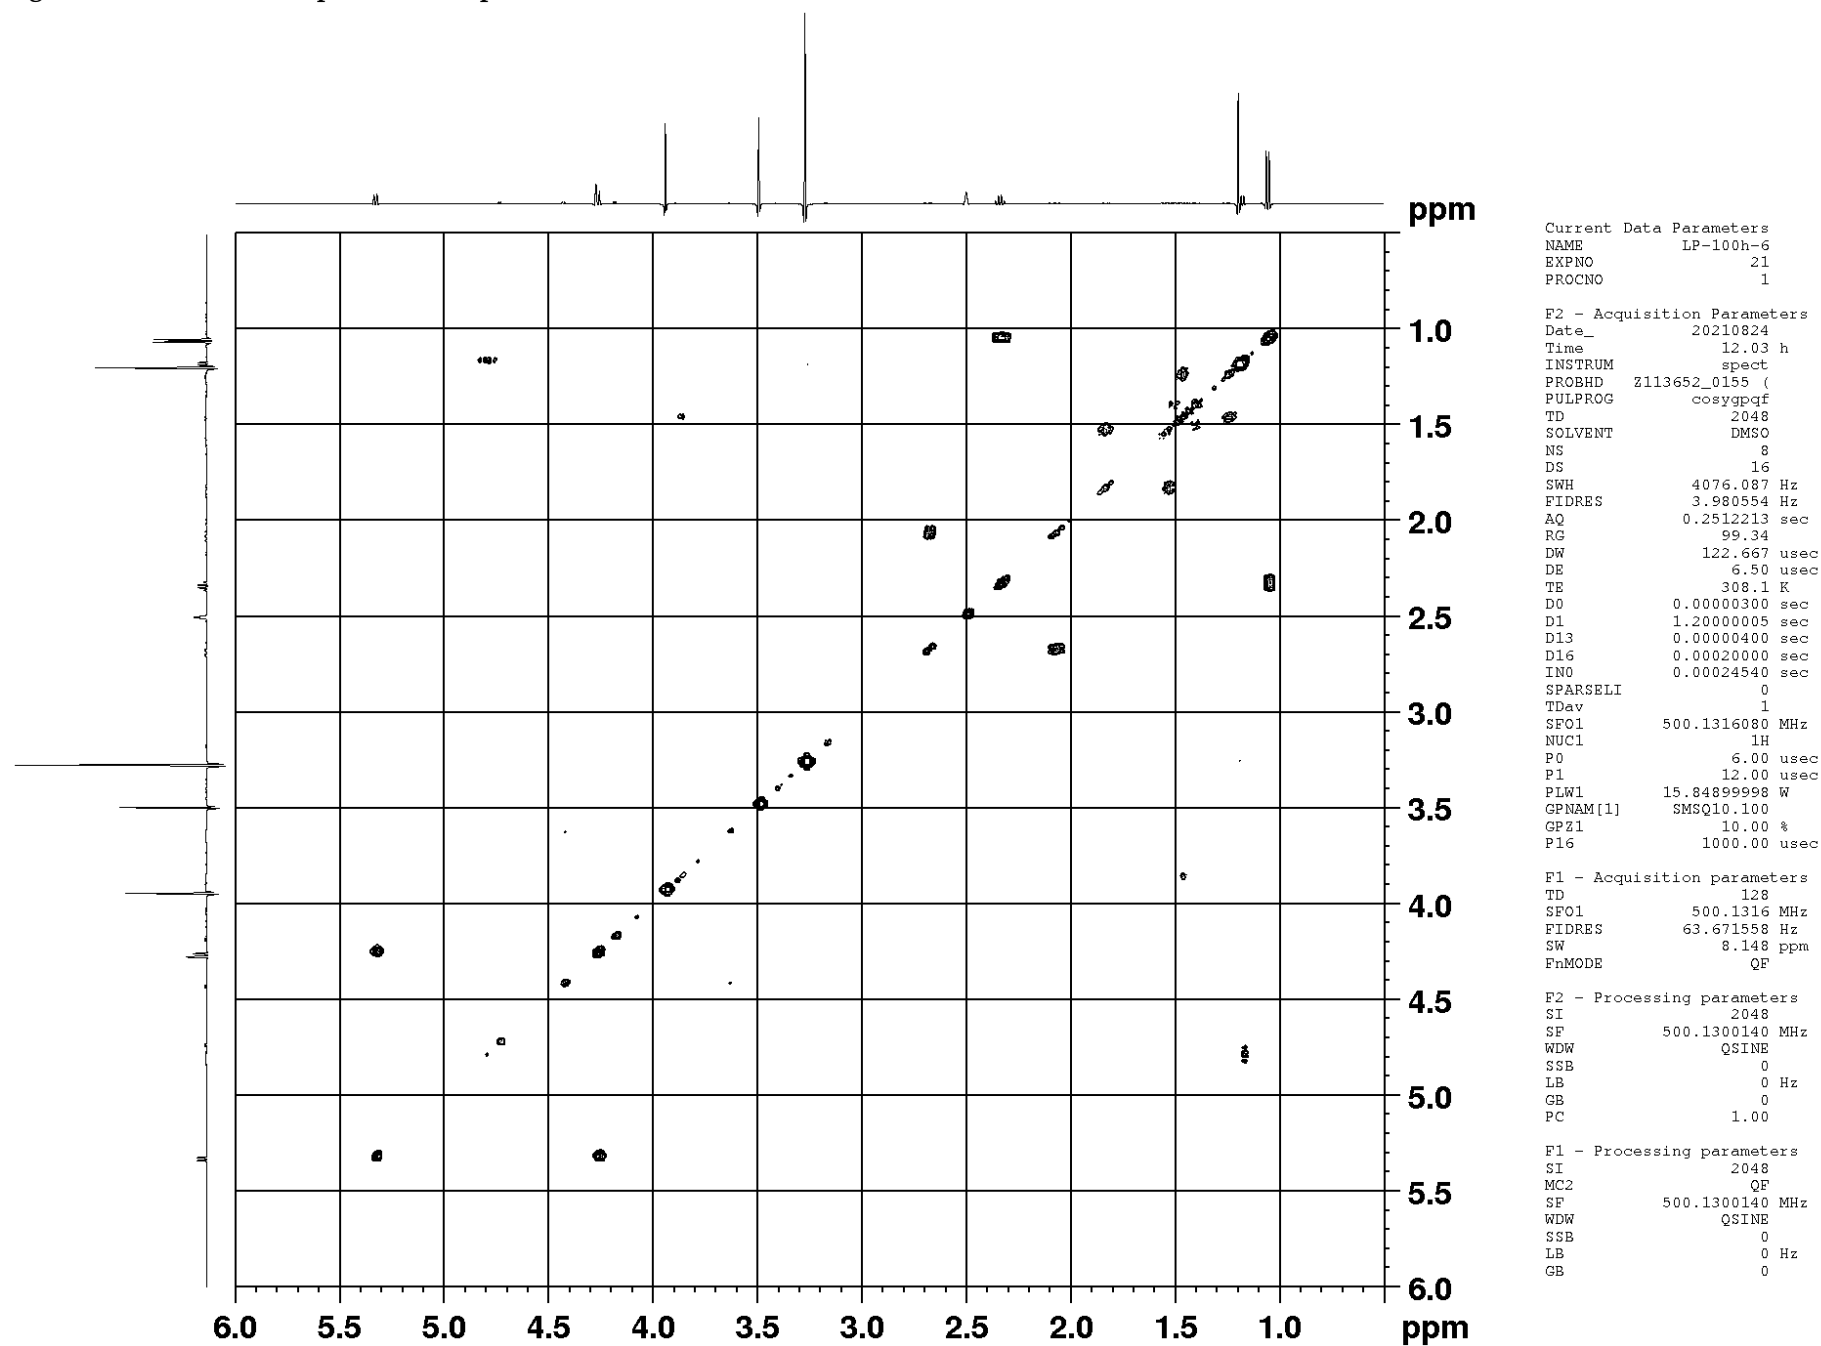

Figure S15. HMBC spectrum of lopouzanone B (2)

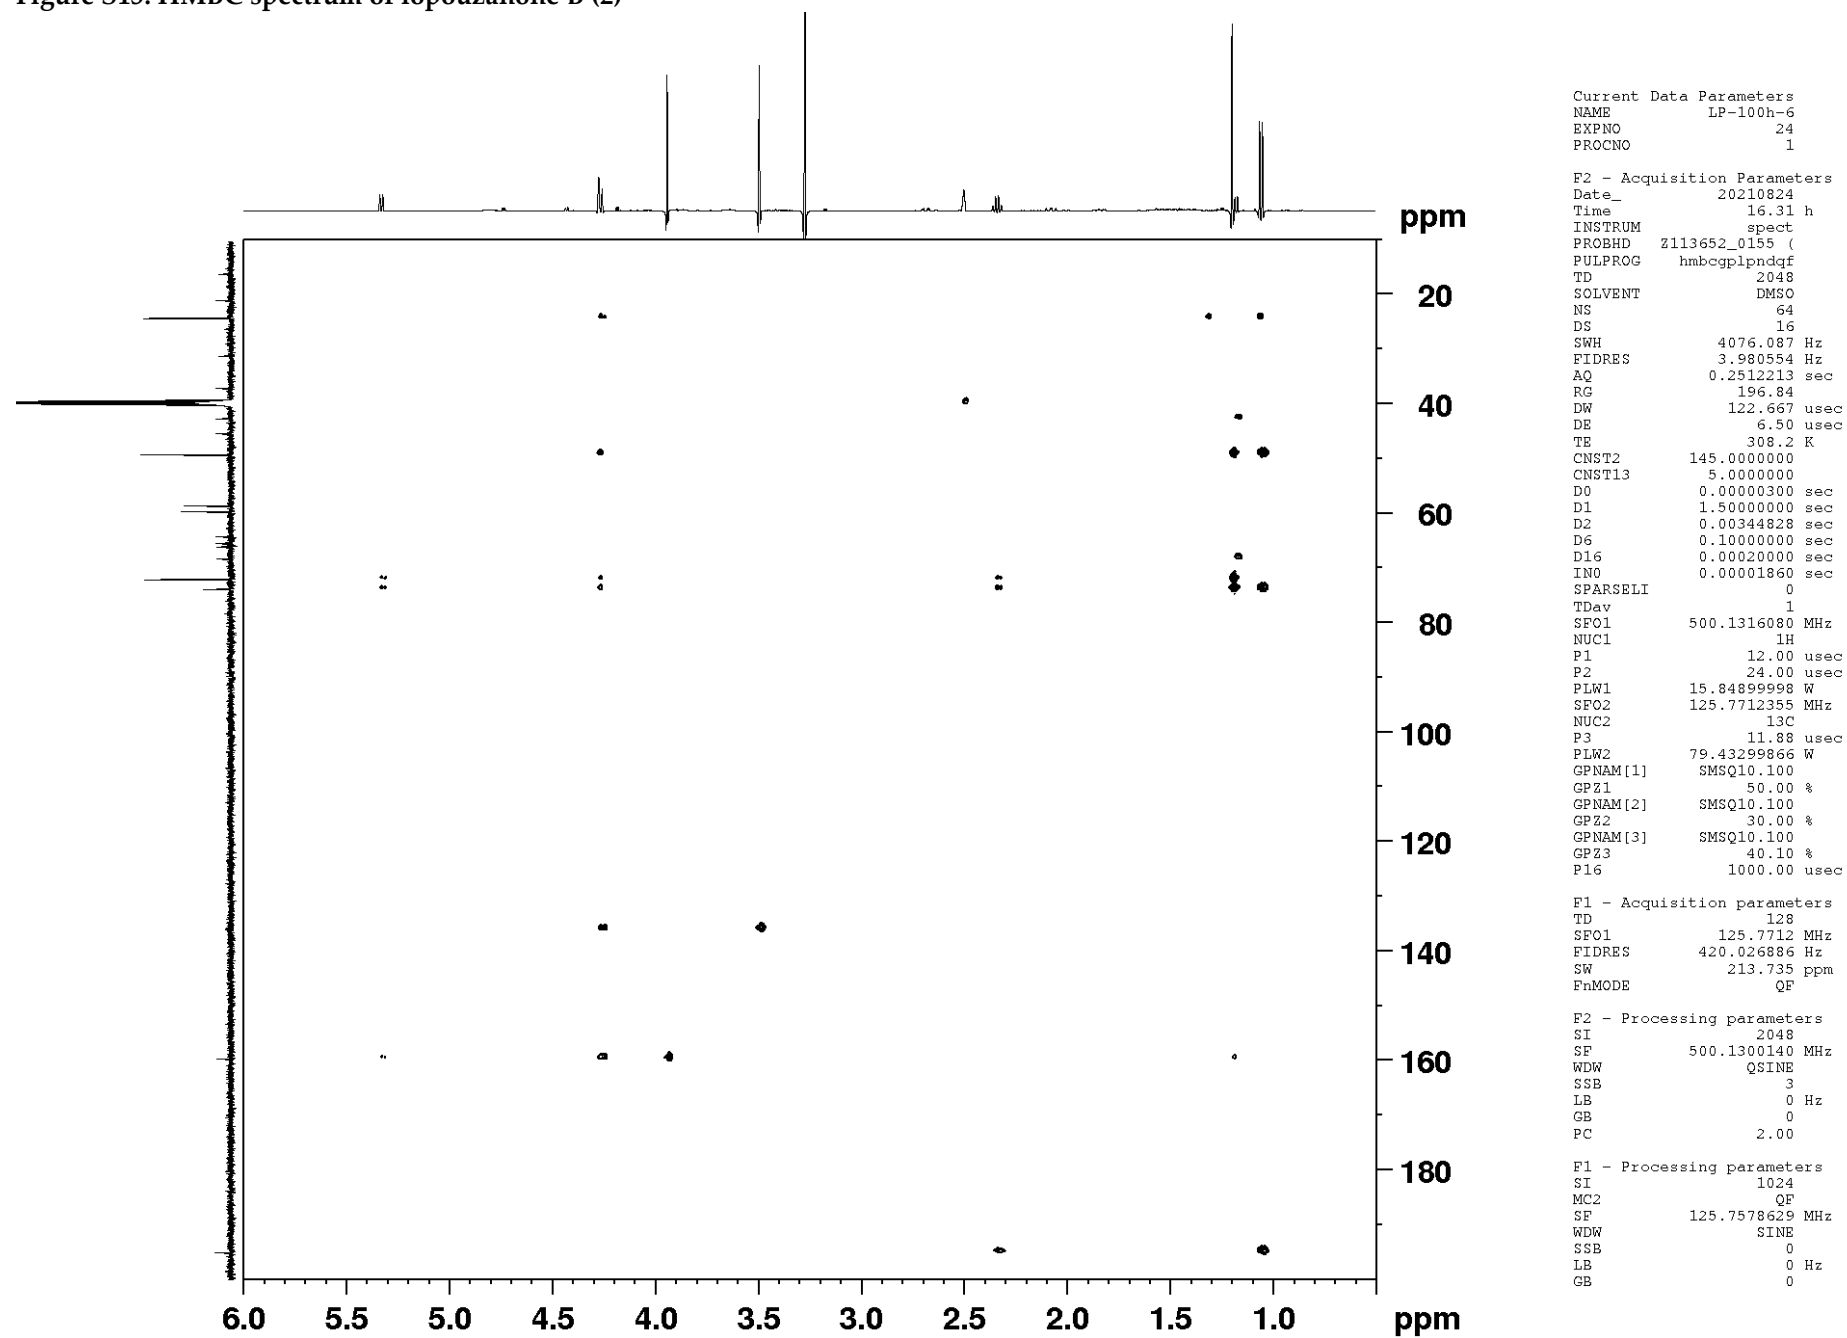

Figure S16. HSQC spectrum of lopouzanone B (2)

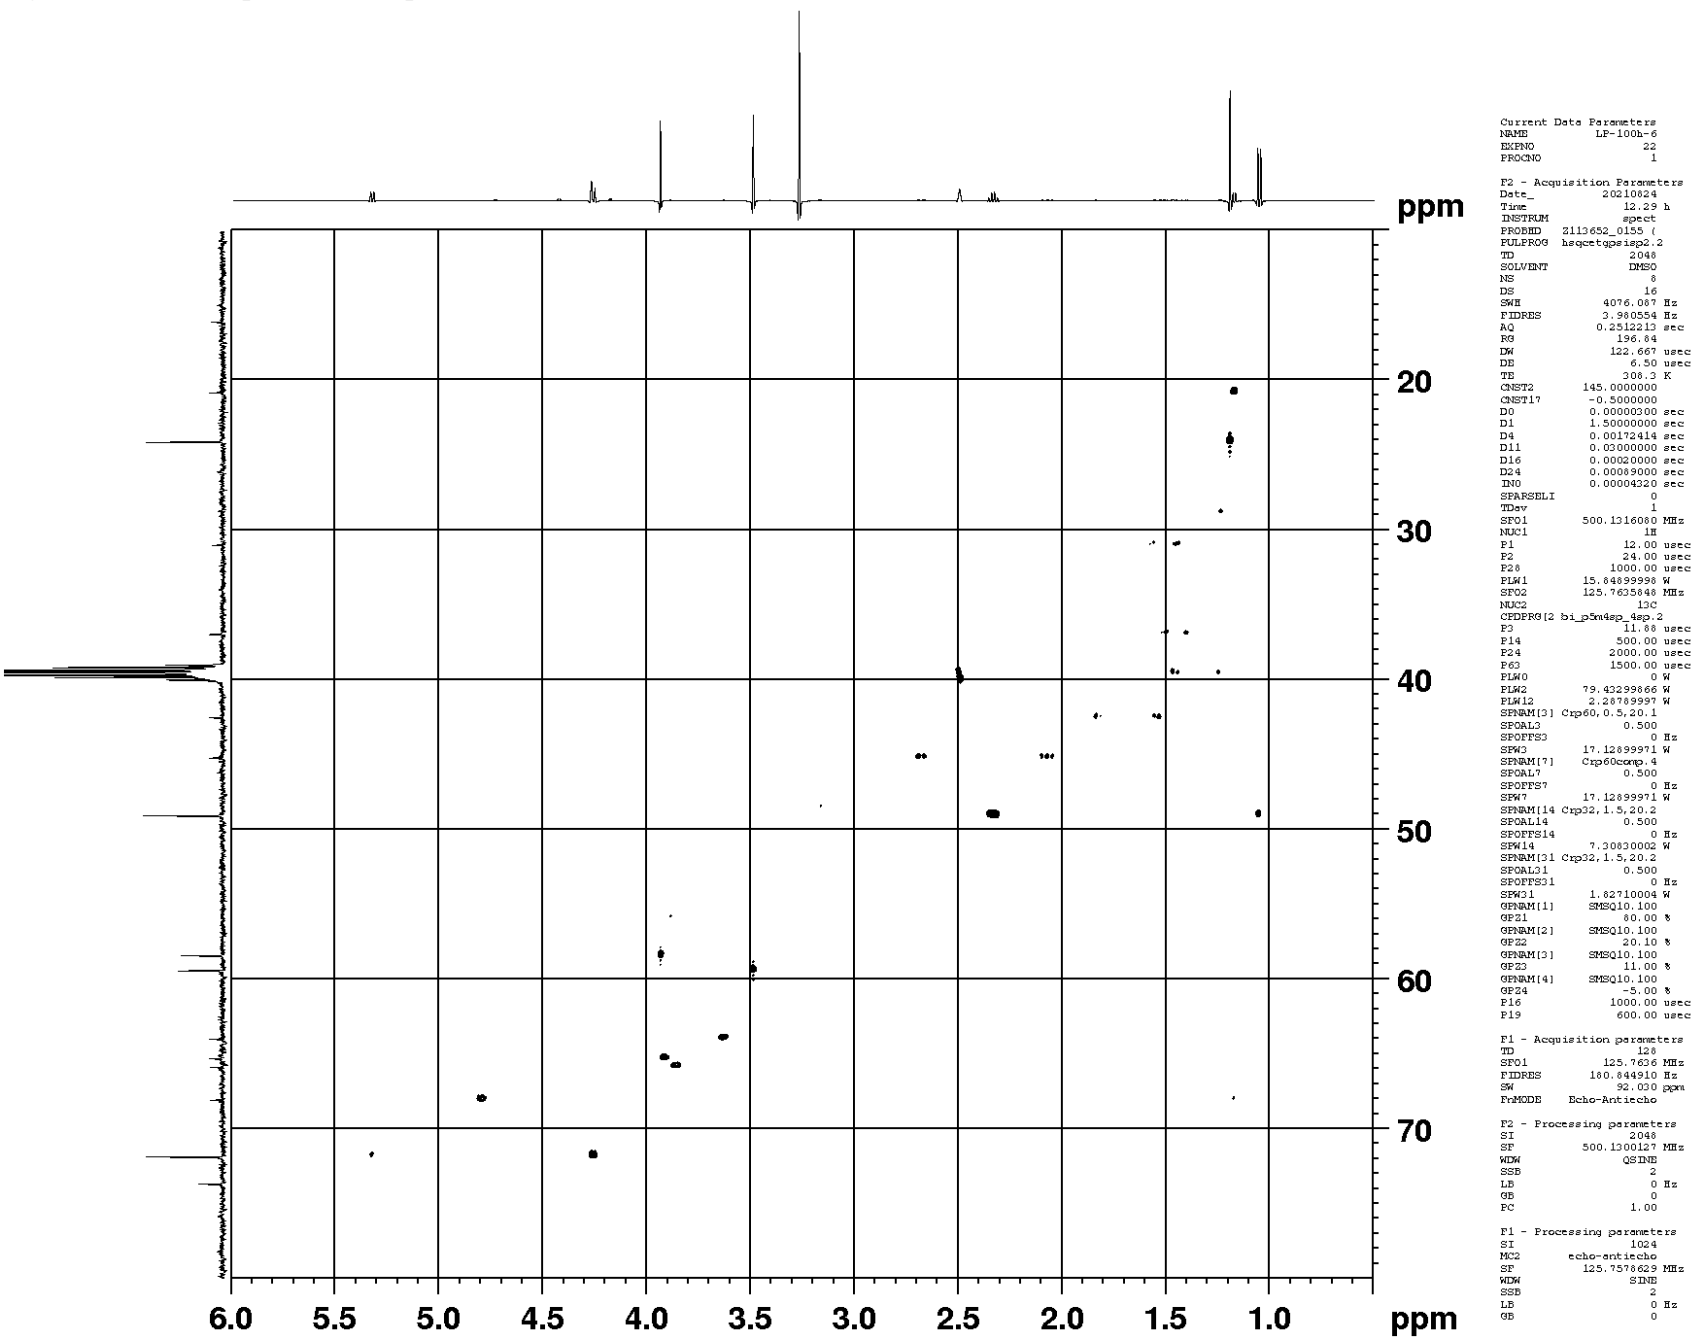

Figure S17. ROESY spectrum of lopouzanone B (2)

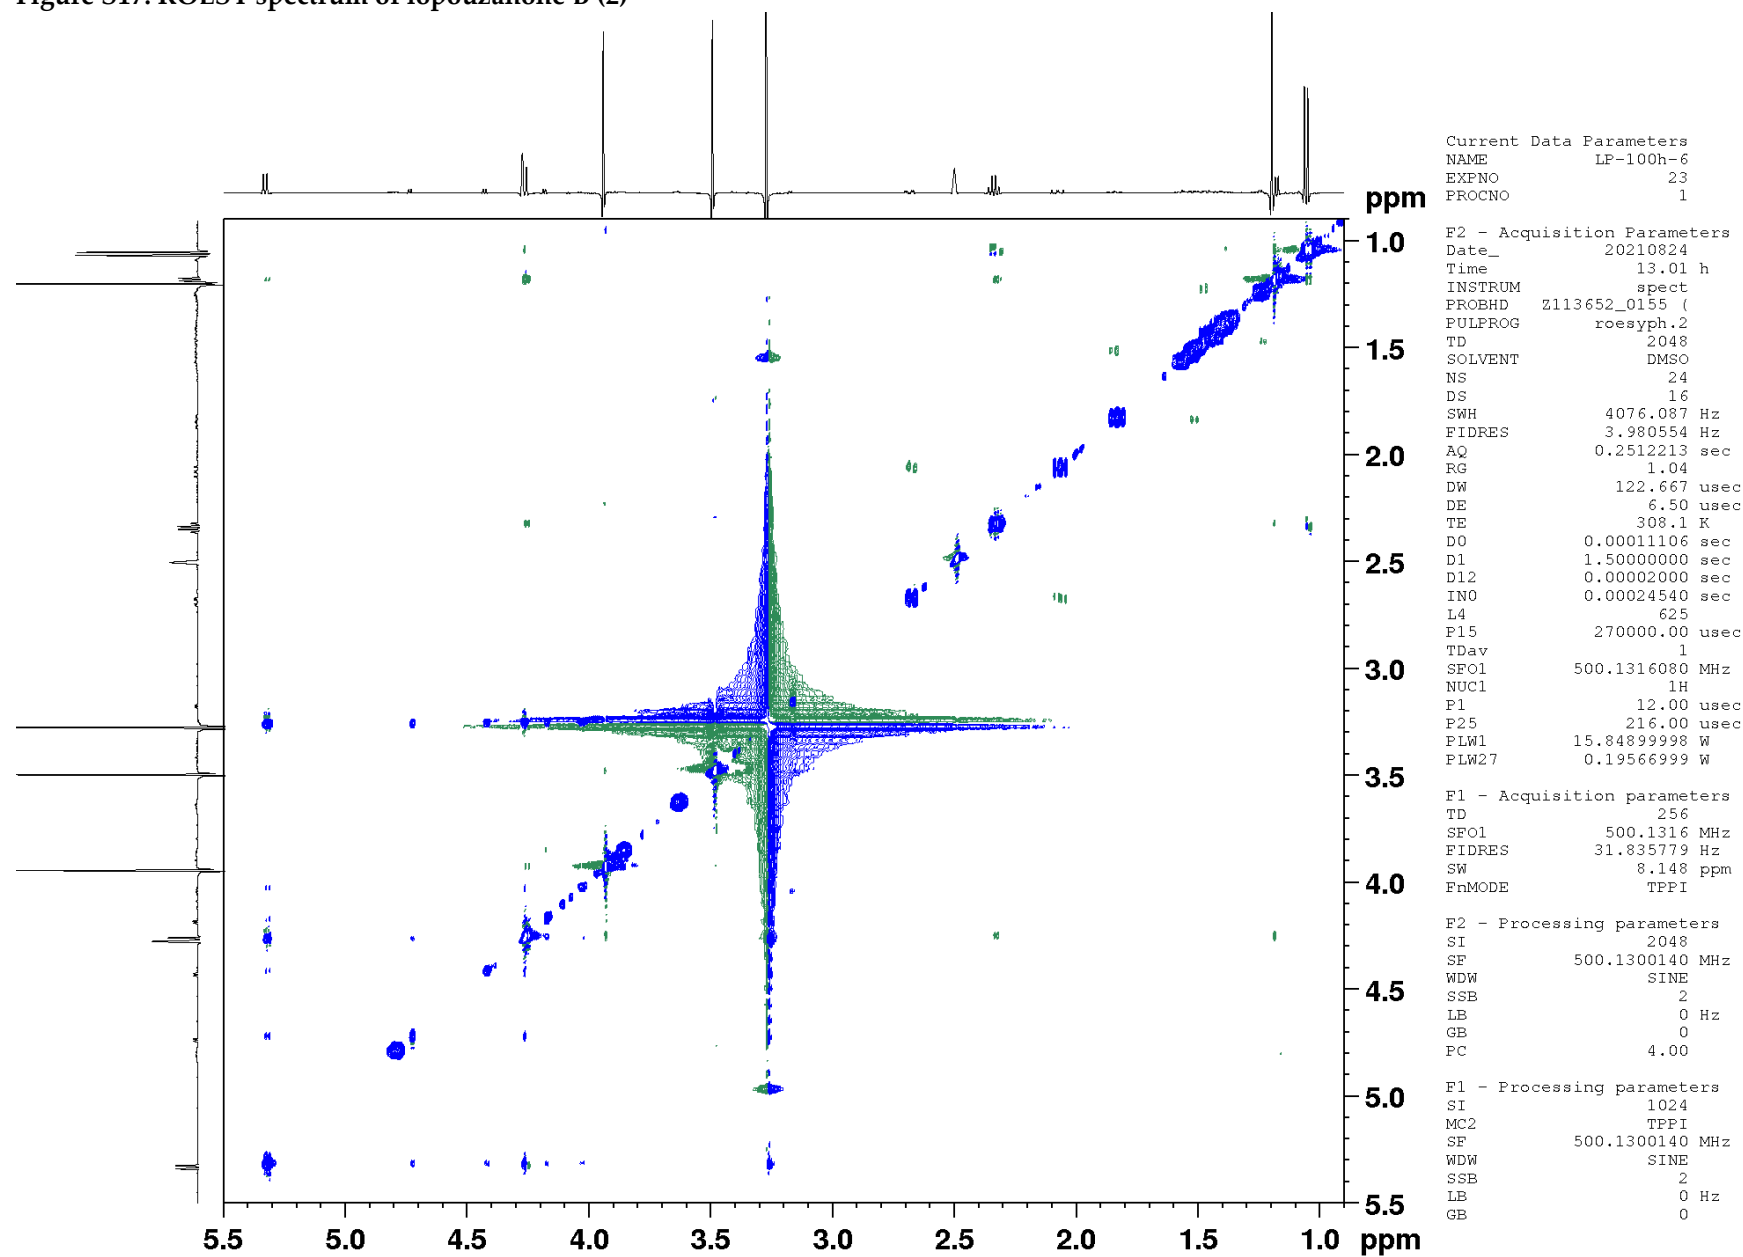

Figure S18. CD spectrum of lopouzanone B (2)

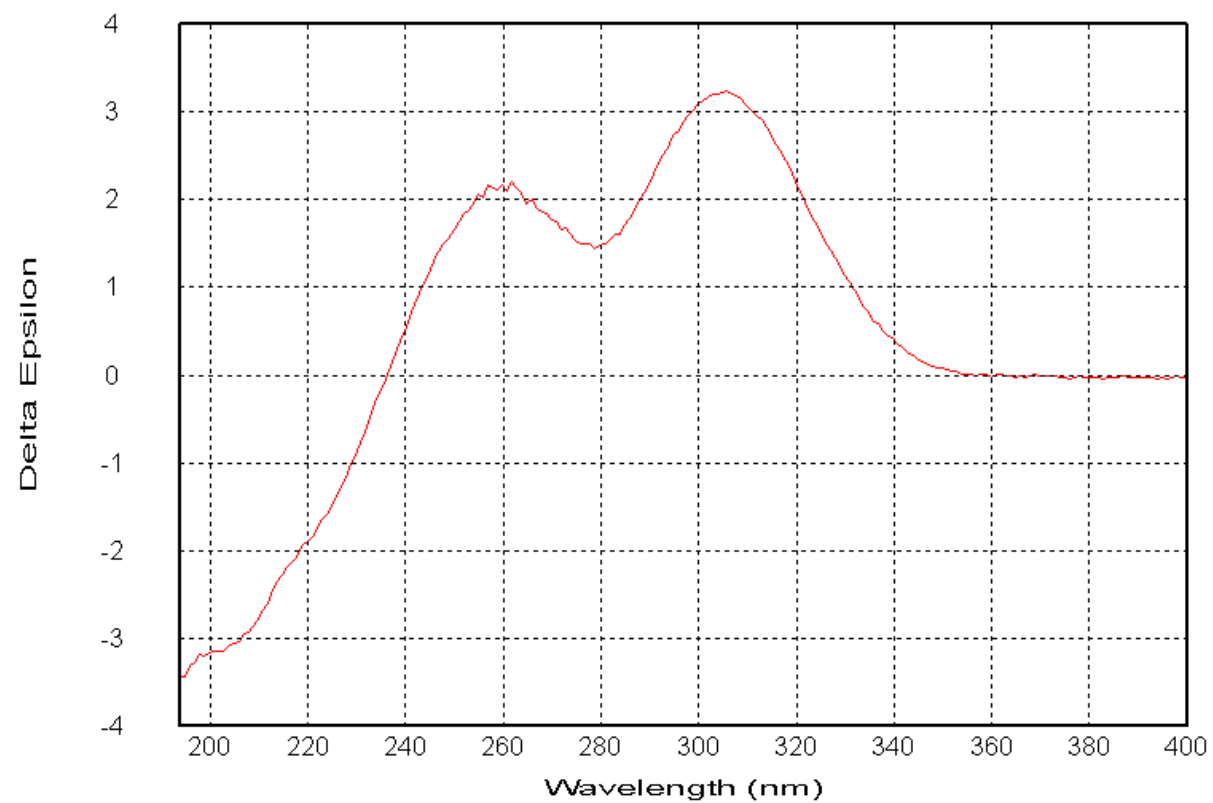

Figure S19. <sup>1</sup>H NMR spectrum for (R)-MTPA esters of lopouzanone B (2)

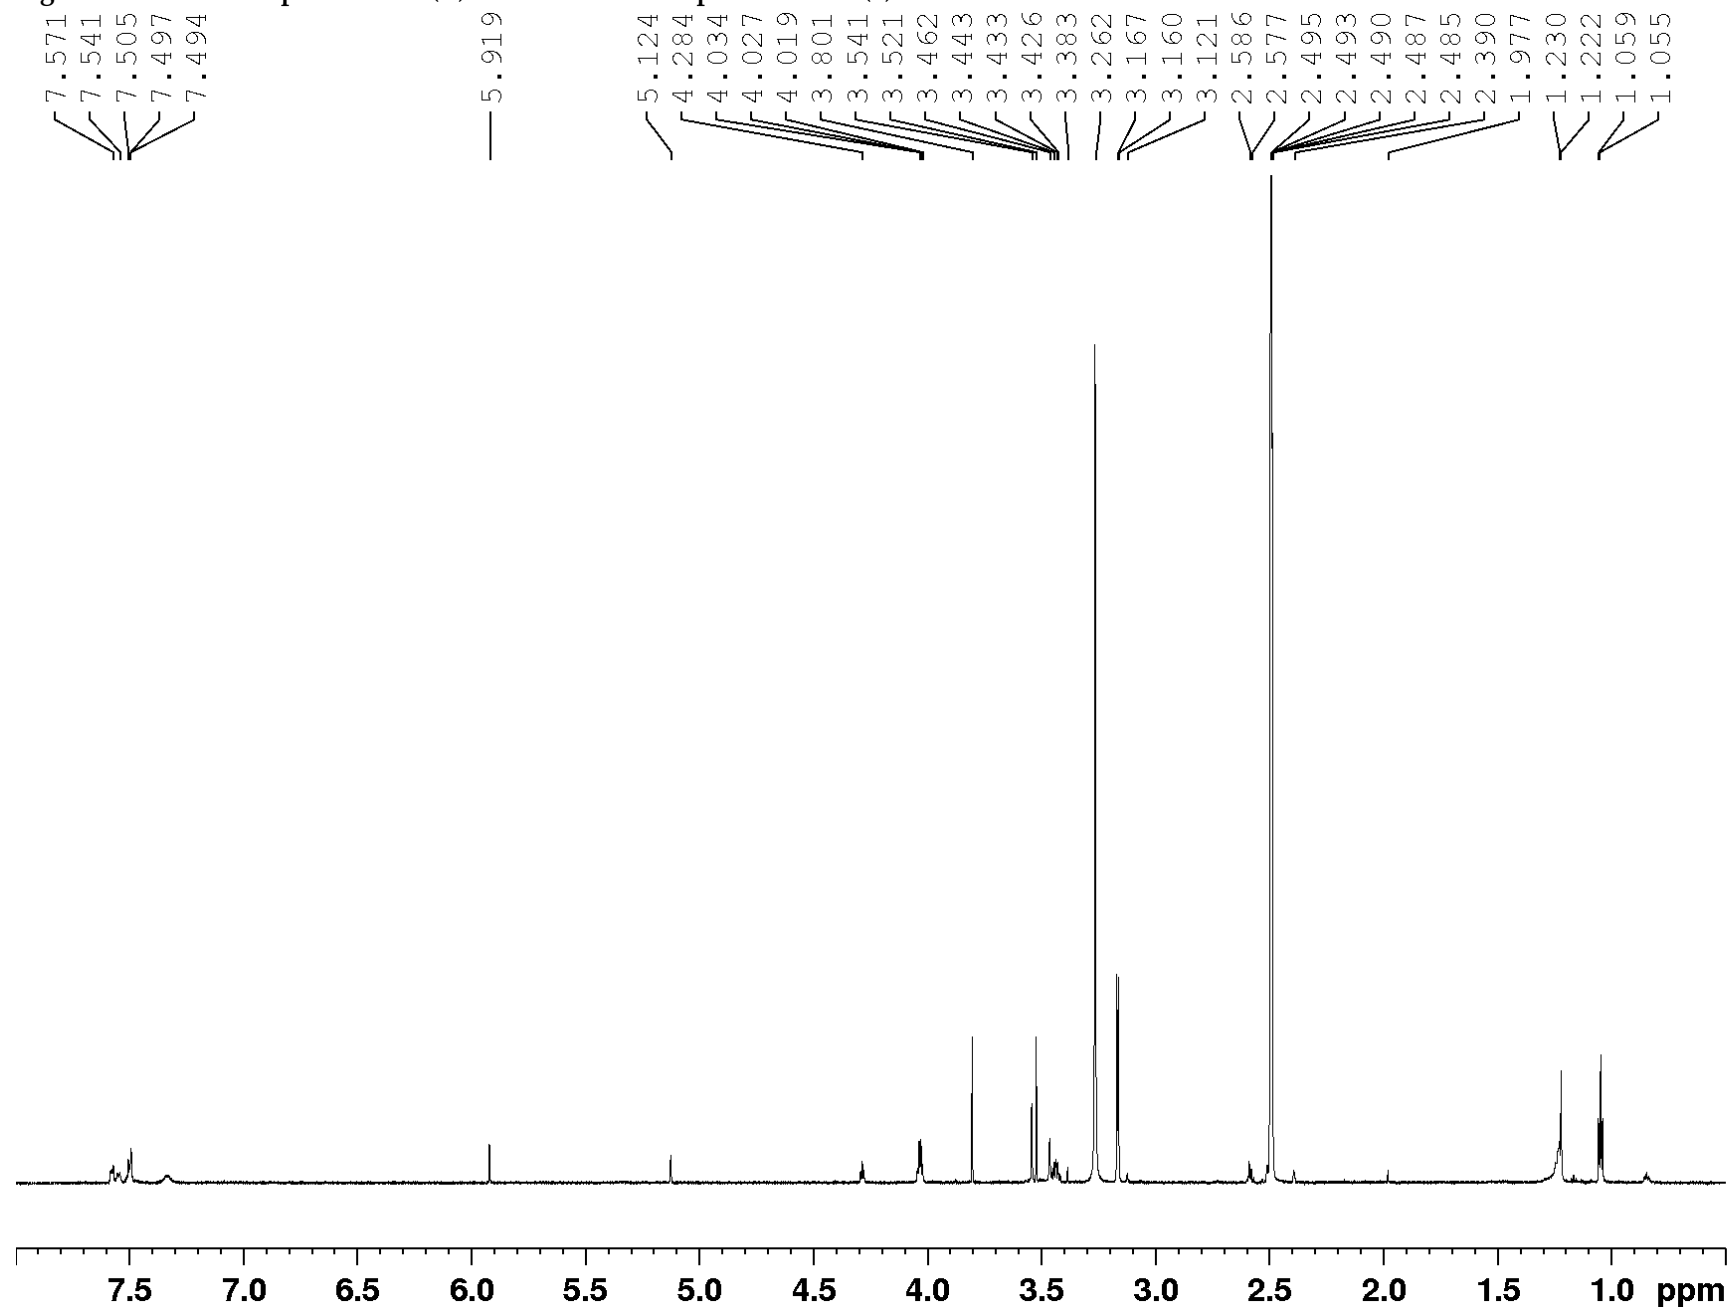

Current Data Parameters  
NAME LP-107h-1-S  
EXPNO 5  
PROCNO 1

F2 - Acquisition Parameters  
Date\_ 20220429  
Time 10.32 h  
INSTRUM spect  
PROBHD Z134216\_0006 (  
PULPROG zg30  
TD 32768  
SOLVENT DMSO  
NS 2  
DS 2  
SWH 5707.763 Hz  
FIDRES 0.348374 Hz  
AQ 2.8704767 sec  
RG 150.24  
DW 87.600 usec  
DE 6.50 usec  
TE 308.0 K  
D1 0 sec  
TD0 1  
SFO1 700.0031840 MHz  
NUC1 1H  
P0 5.33 usec  
P1 16.00 usec  
PLW1 11.27900028 W

F2 - Processing parameters  
SI 32768  
SF 700.0000127 MHz  
WDW EM  
SSB 0  
LB 0.10 Hz  
GB 0  
PC 4.00

Figure S20.  $^1\text{H}$ - $^1\text{H}$  COSY spectrum for (R)-MTPA esters of lopouzanone B (2)

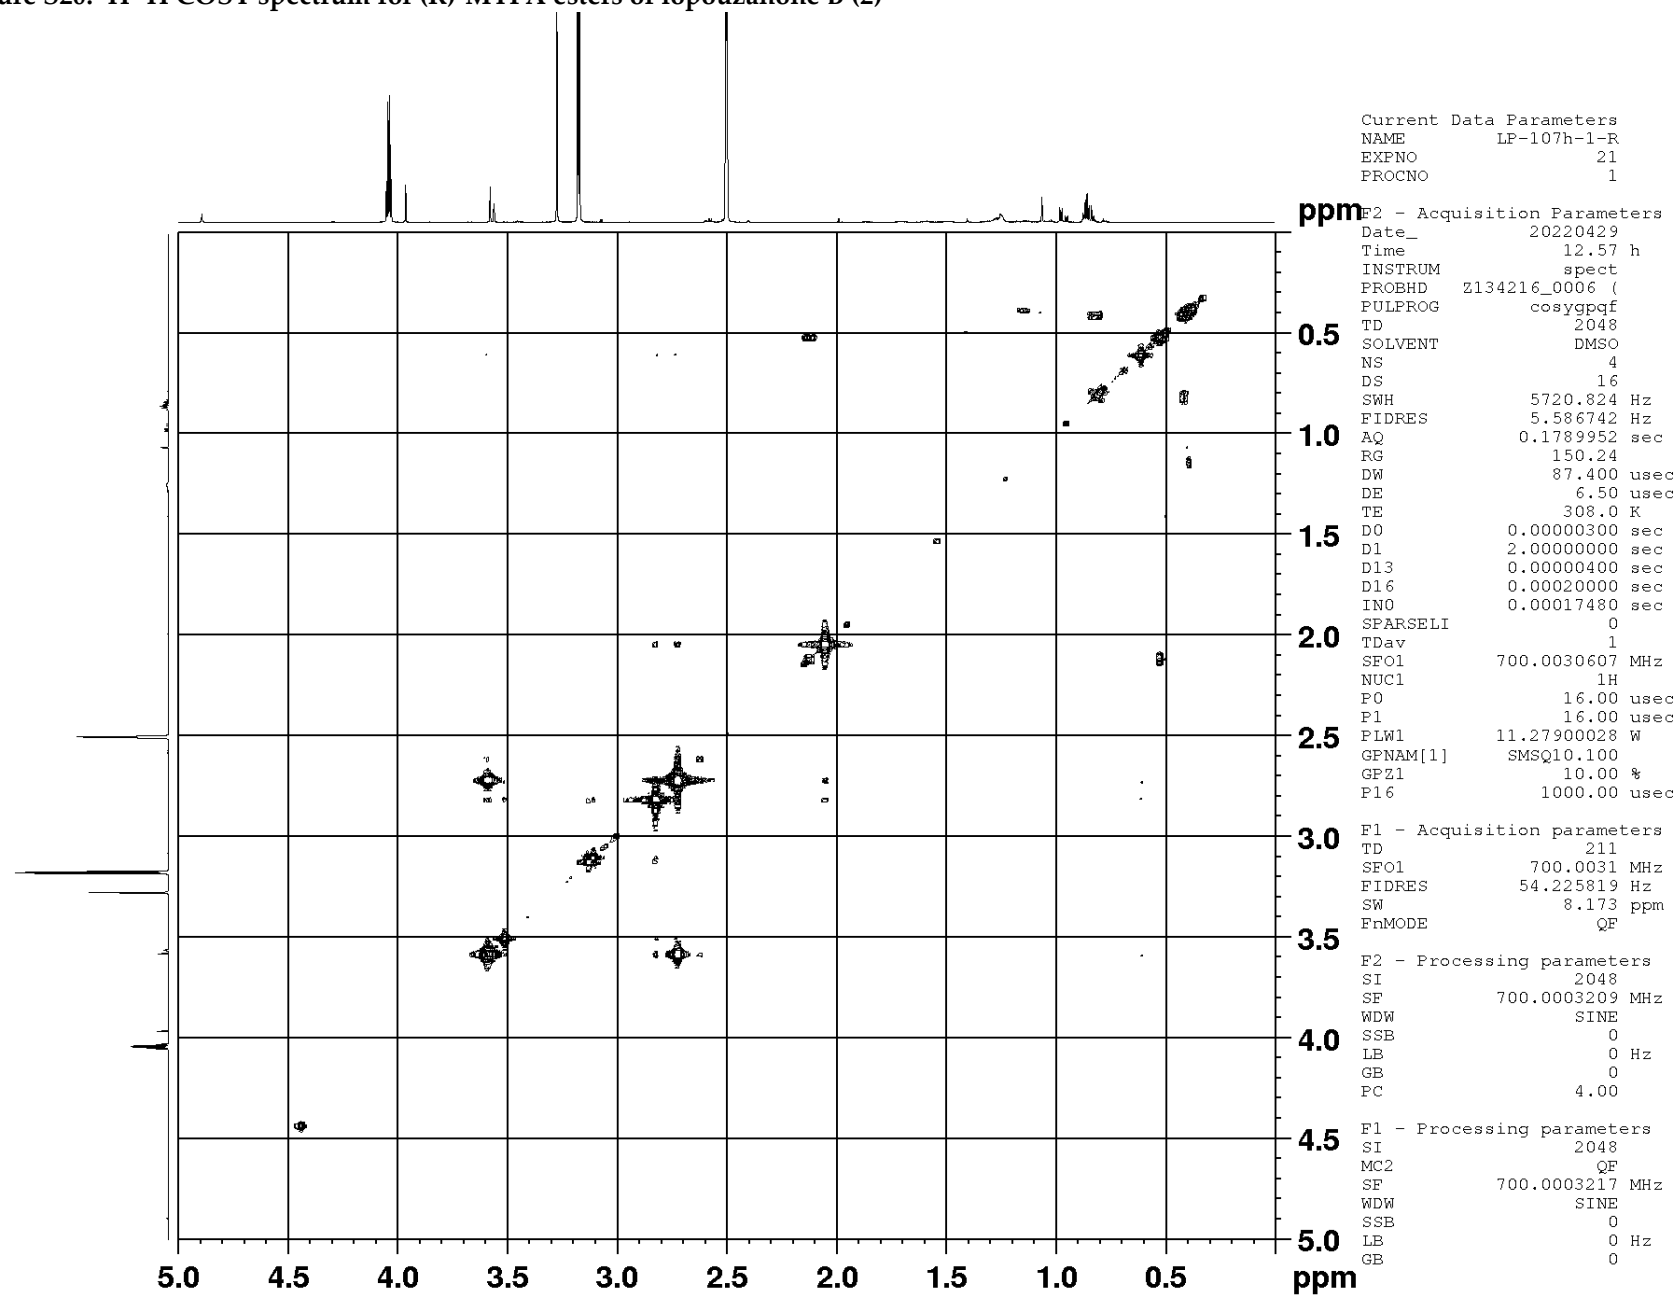

Figure S21. <sup>1</sup>H NMR spectrum for (S)-MTPA esters of lopouzanone B (2)

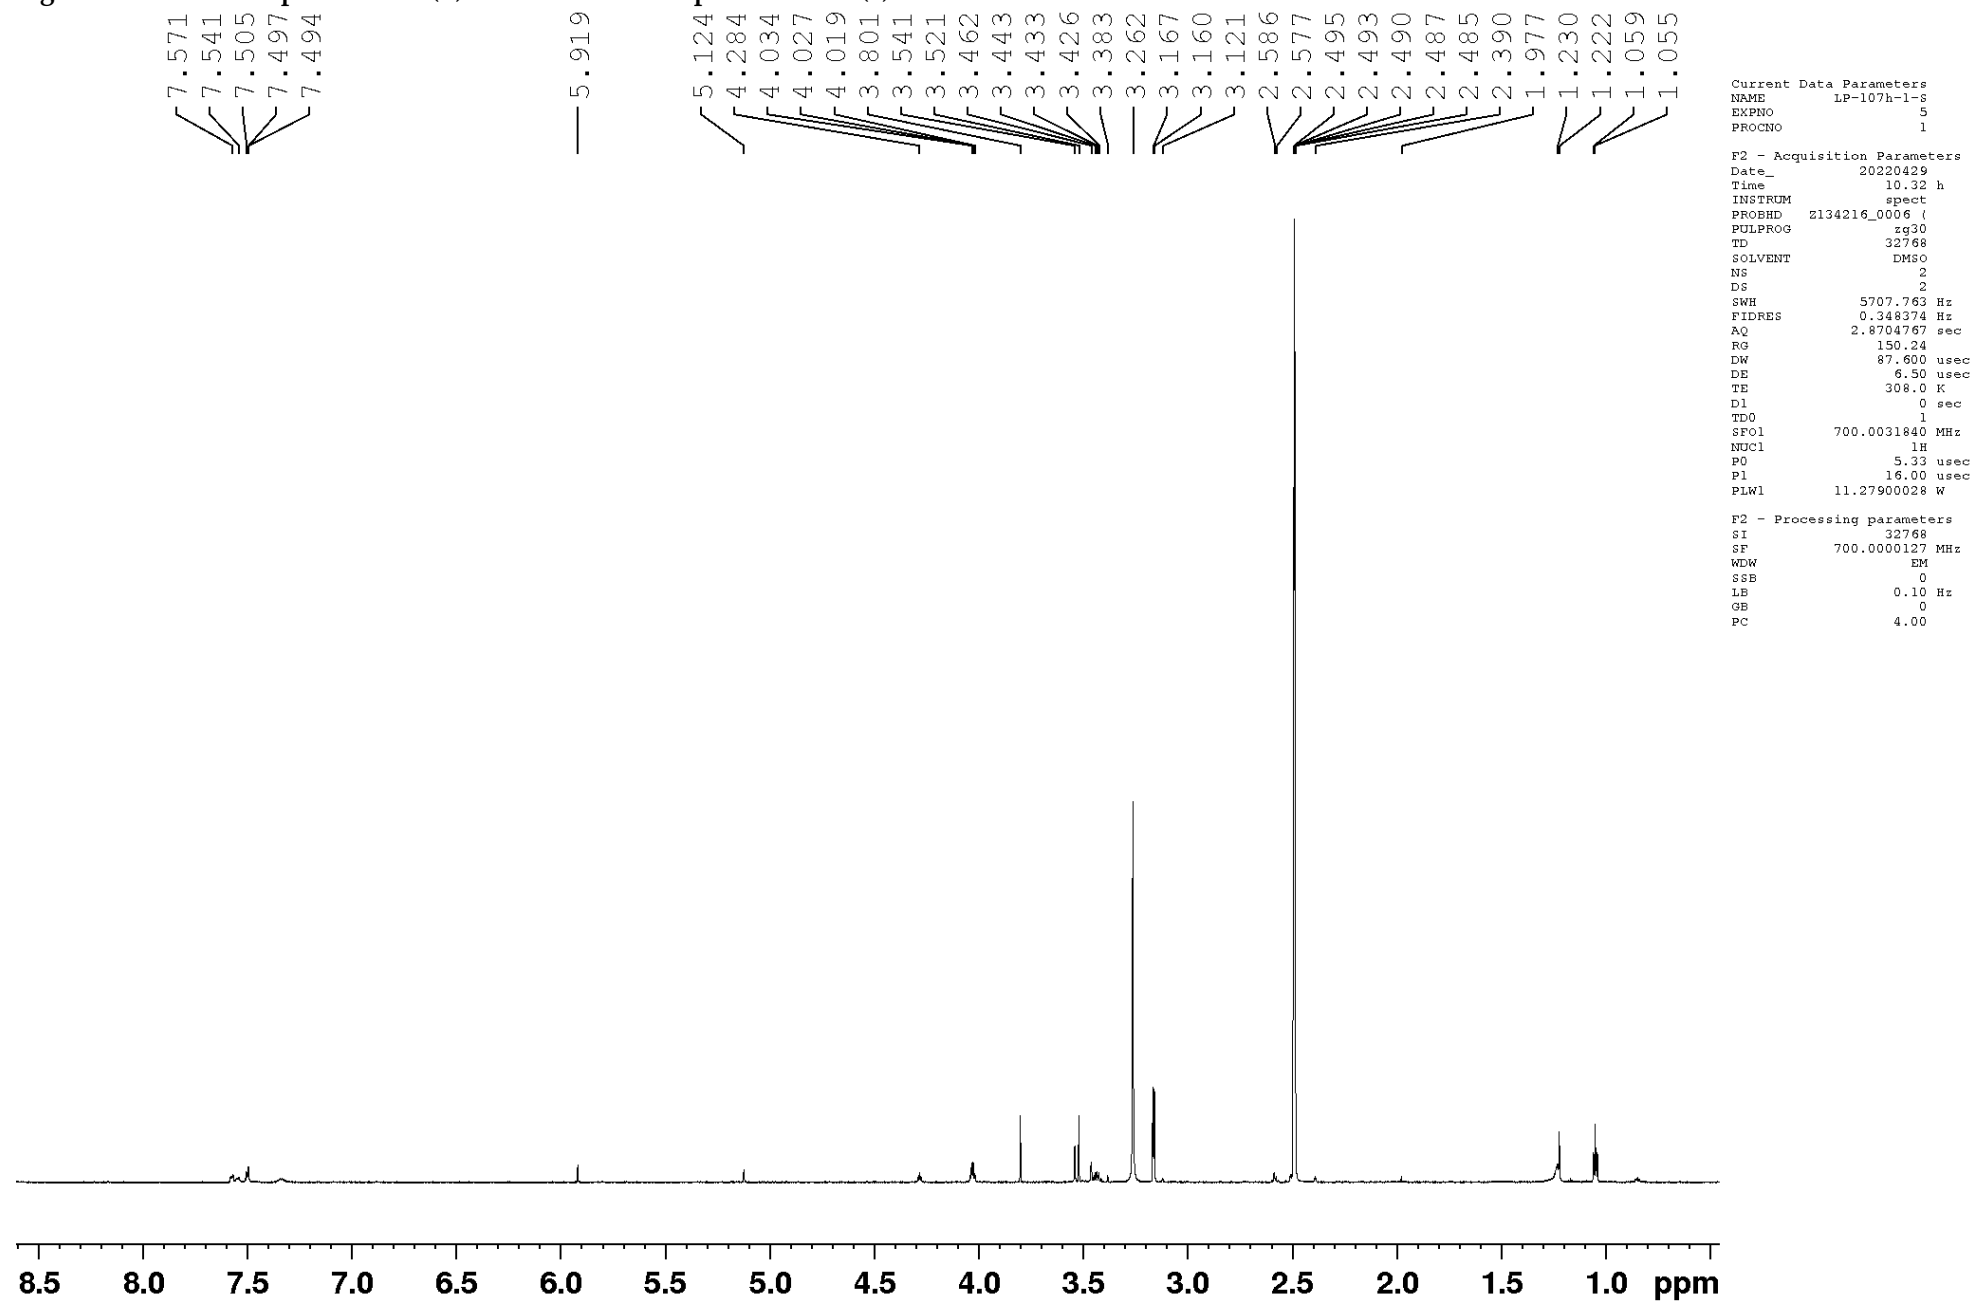



Figure S22.  $^1\text{H}$ - $^1\text{H}$  COSY spectrum for (S)-MTPA esters of lopouzanone B (2)

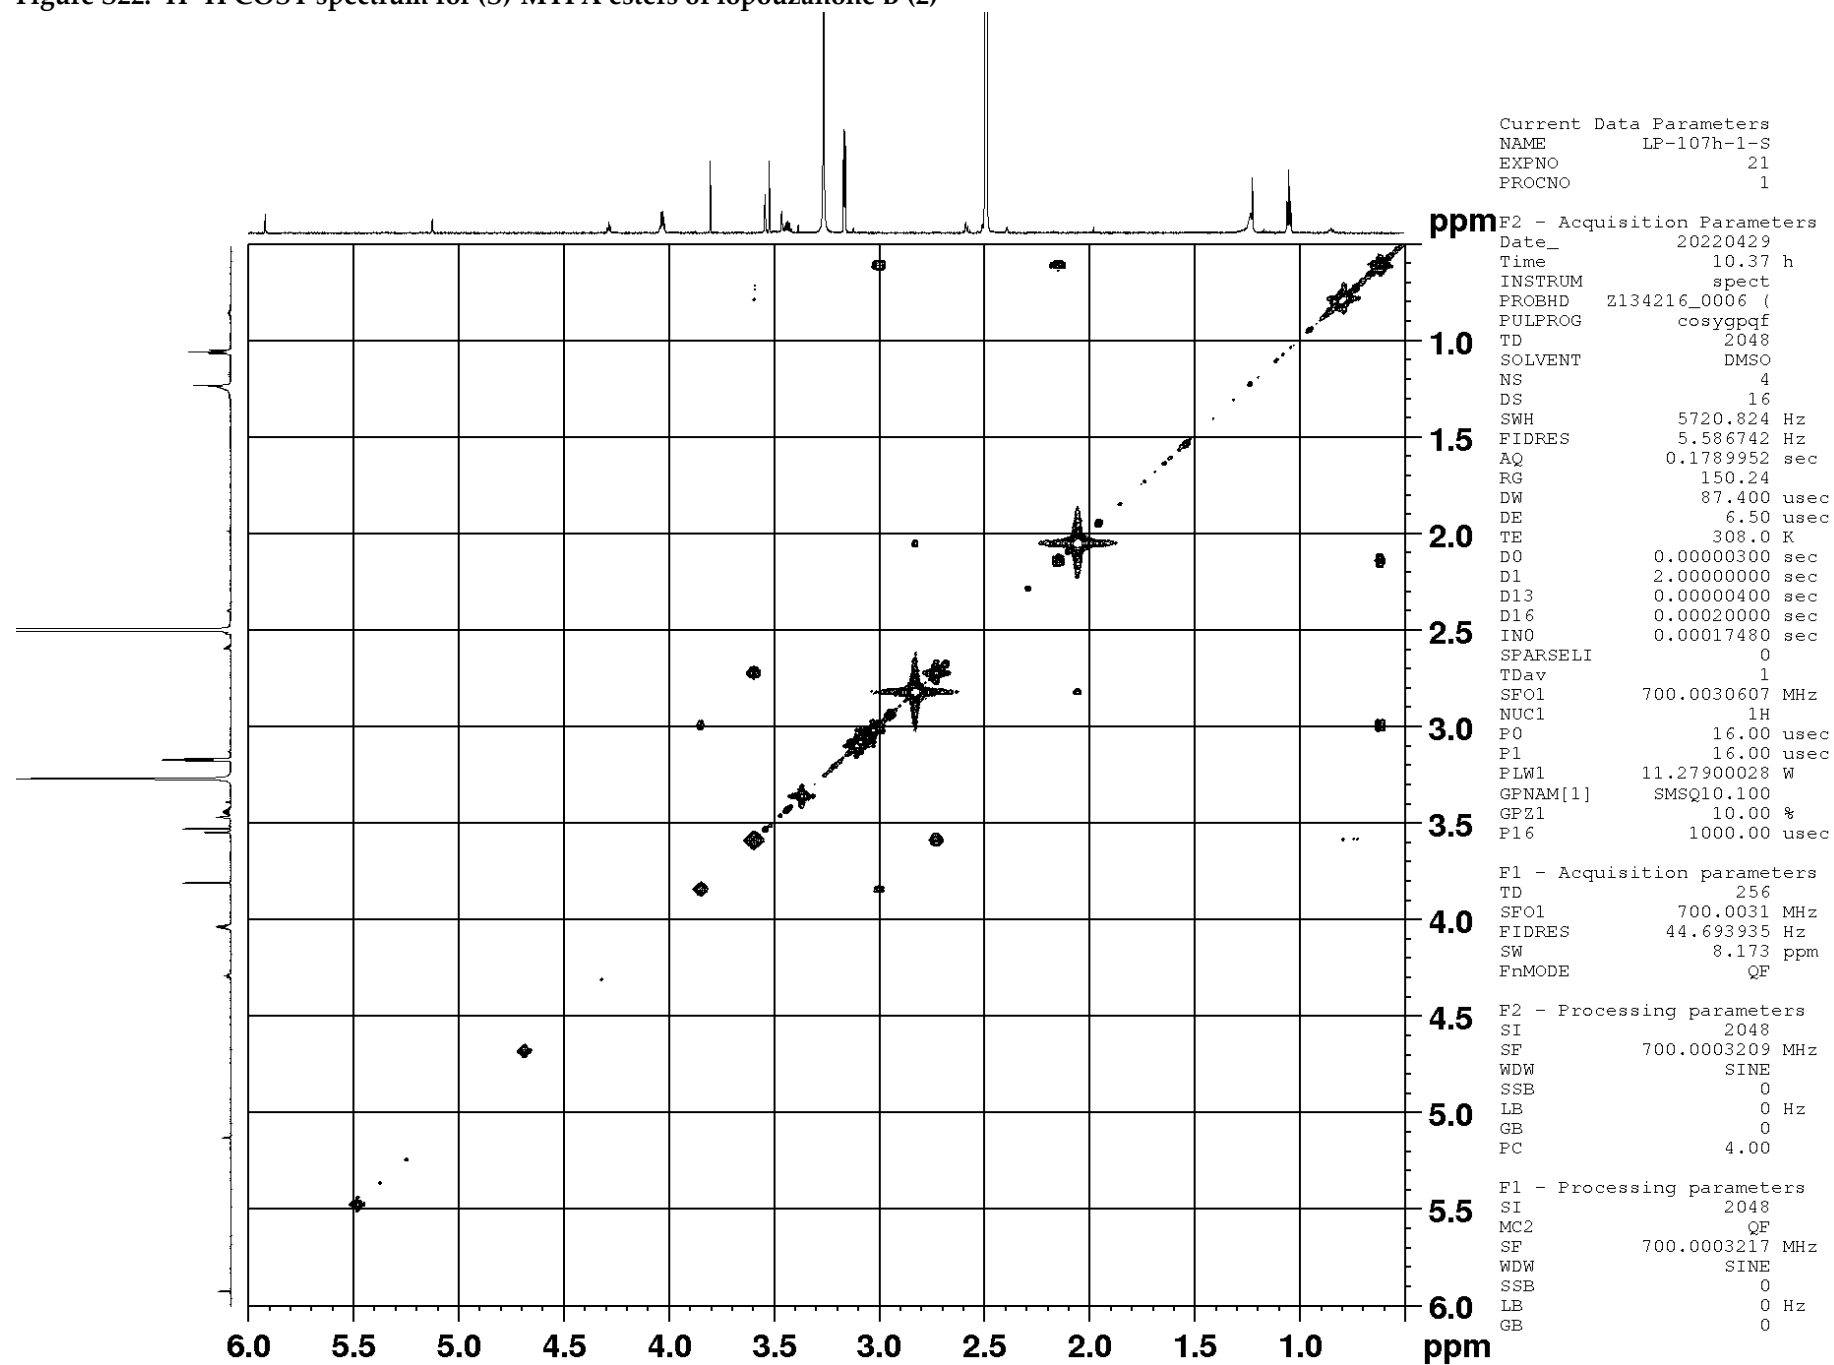

Figure S23. <sup>1</sup>H NMR spectrum of gliorosein (3)

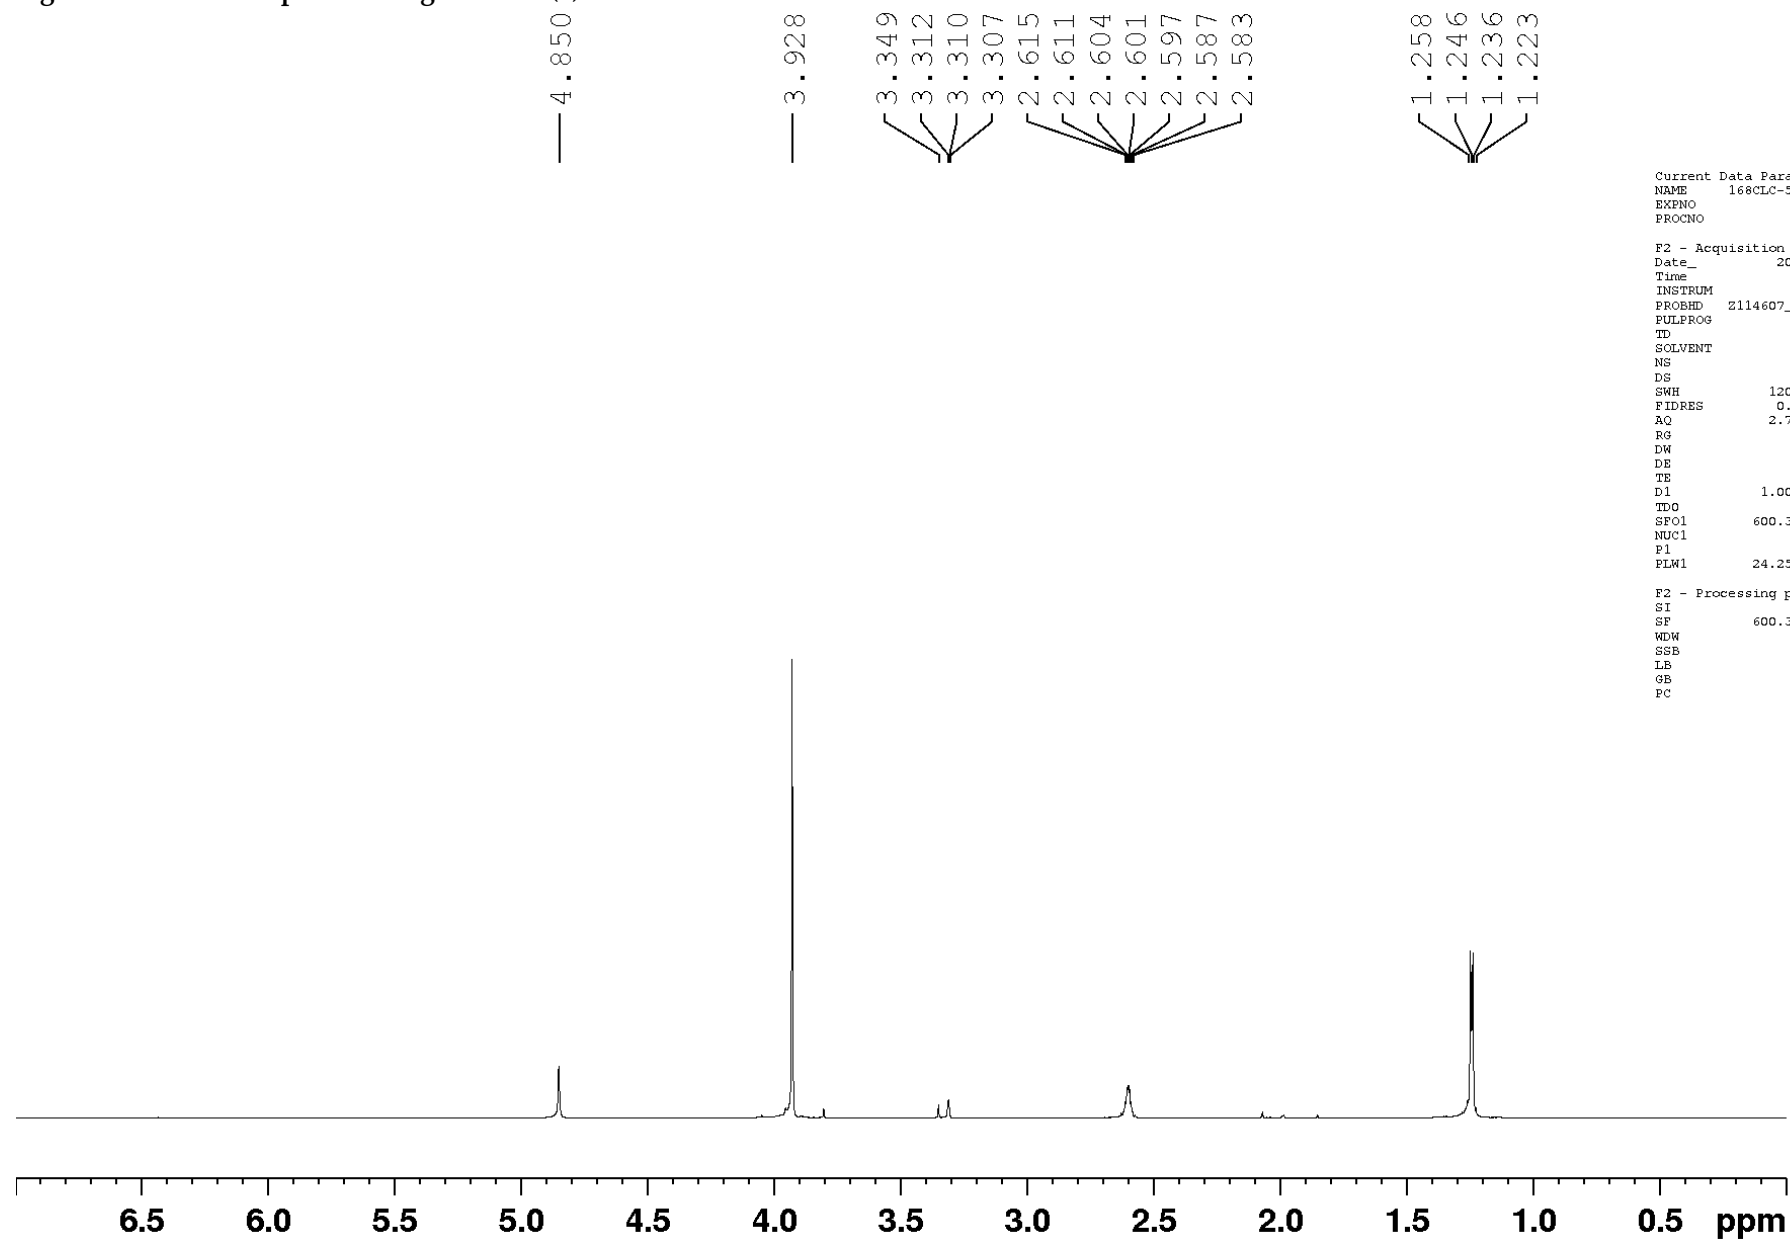

Current Data Parameters  
NAME 168CLC-57.3-rfc70%-rp5-1H-CD3OD-17.4 mg  
EXPNO 1  
PROCNO 1

F2 - Acquisition Parameters  
Date\_ 20180713  
Time 11.47 h  
INSTRUM spect  
PROBHD Z114607\_0270 (1  
PULPROG zg30  
TD 65536  
SOLVENT MeOD  
NS 64  
DS 2  
SWH 12019.230 Hz  
FIDRES 0.366798 Hz  
AQ 2.7262976 sec  
RG 49.47  
DW 41.600 usec  
DE 6.50 usec  
TE 296.5 K  
D1 1.00000000 sec  
TDO 1  
SFO1 600.3147069 MHz  
NUC1 1H  
P1 10.00 usec  
PLW1 24.25499916 W

F2 - Processing parameters  
SI 65536  
SF 600.3110118 MHz  
WDW EM  
SSB 0  
LB 0.30 Hz  
GB 0  
PC 1.00

Figure S24.  $^{13}\text{C}$  NMR spectrum of gliorosein (3)

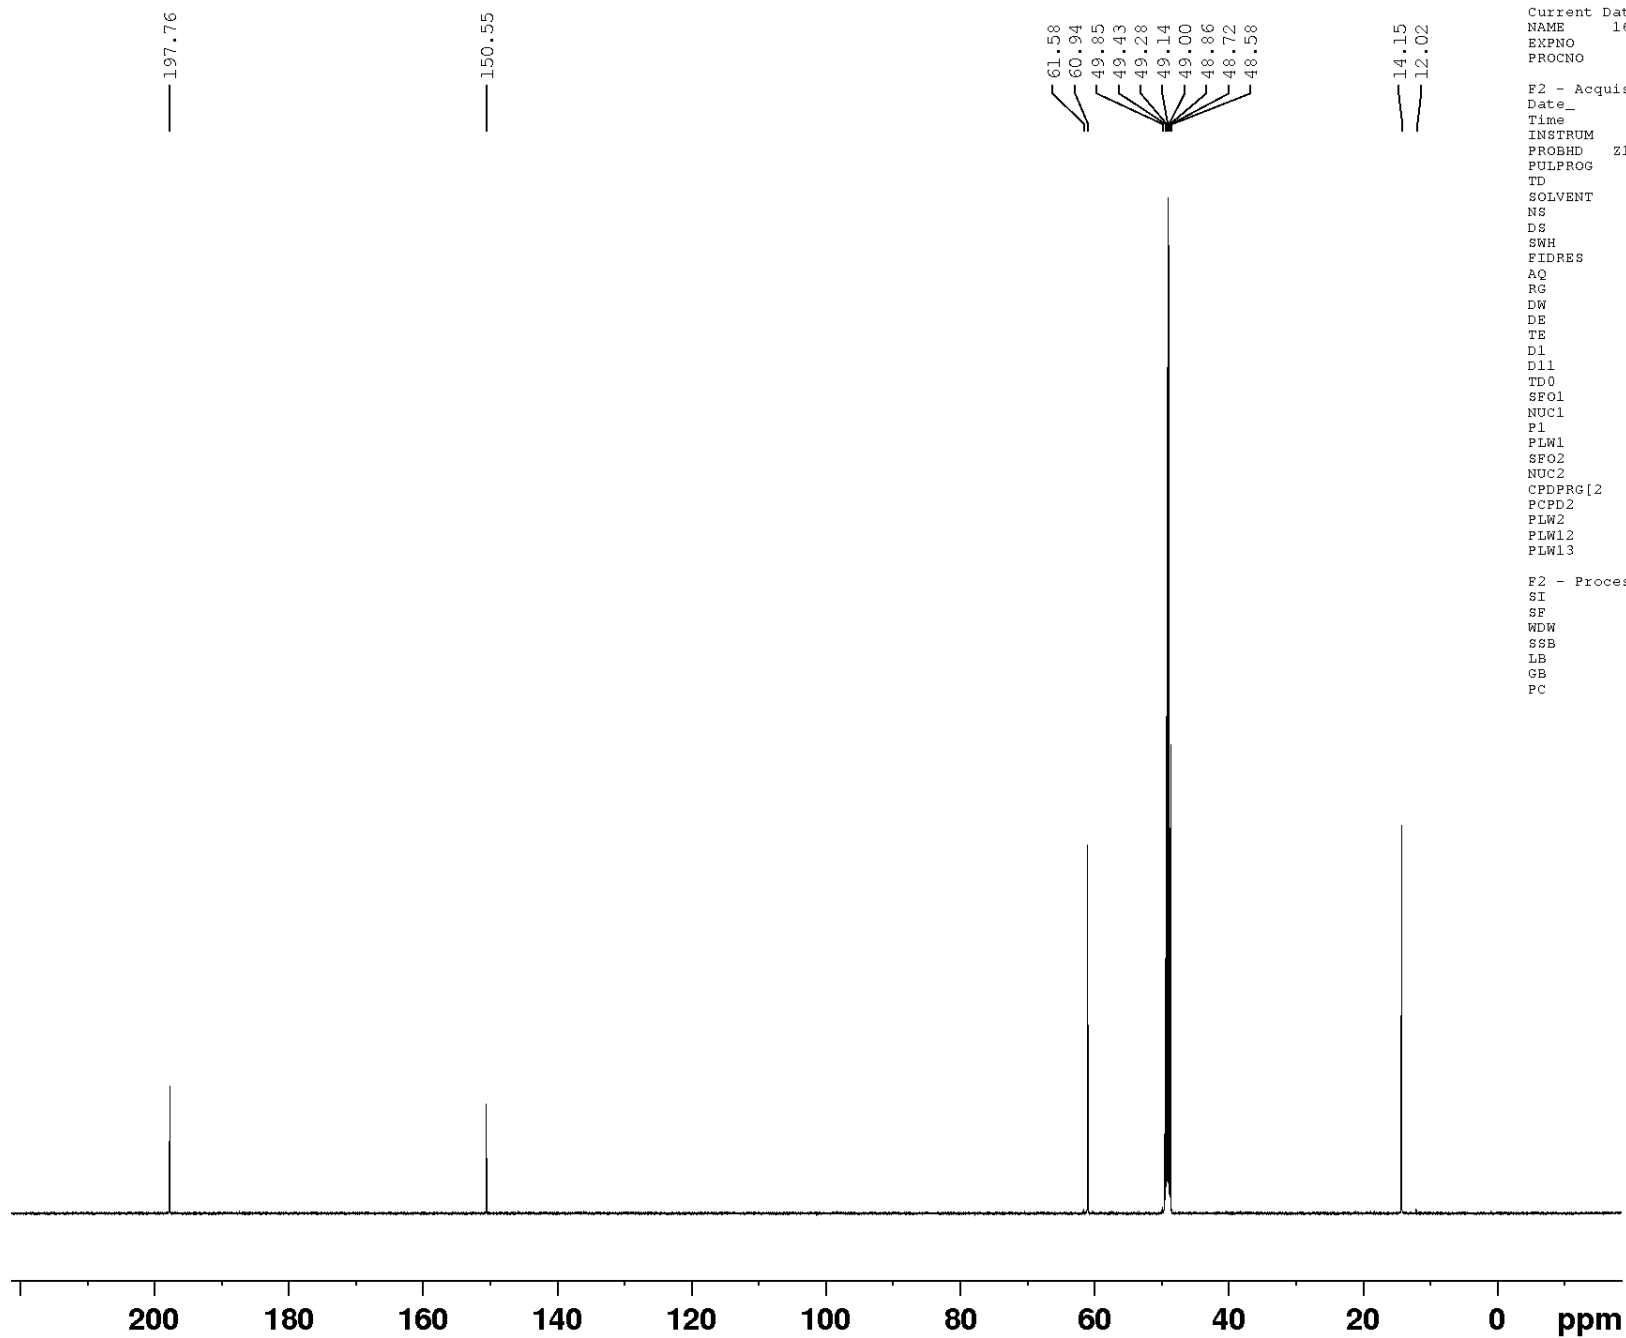

Current Data Parameters  
NAME 168CLC-57.3-ffc70%-rp5-13C-CD3OD-17.4 m  
EXPNO 1  
PROCNO 1

F2 - Acquisition Parameters  
Date\_ 20180714  
Time 18.33 h  
INSTRUM spect  
PROBHD Z114607\_0270 (  
PULPROG zgpg30  
TD 65536  
SOLVENT MeOD  
NS 1000  
DS 4  
SWH 36231.883 Hz  
FIDRES 1.105709 Hz  
AQ 0.9043968 sec  
RG 193.95  
DW 13.800 usec  
DE 6.50 usec  
TE 298.3 K  
D1 2.00000000 sec  
D11 0.03000000 sec  
TD0 1  
SFO1 150.9634158 MHz  
NUC1 13C  
P1 12.65 usec  
PLW1 63.09600067 W  
SFO2 600.3134012 MHz  
NUC2 1H  
CPDPRG[2] waltz16  
PCPD2 70.00 usec  
PLW2 24.25499916 W  
PLW12 0.49500000 W  
PLW13 0.24898000 W

F2 - Processing parameters  
SI 32768  
SF 150.9483210 MHz  
WDW EM  
SSB 0  
LB 1.00 Hz  
GB 0  
PC 1.40

Figure S25. CD spectrum of gliorosein (3)

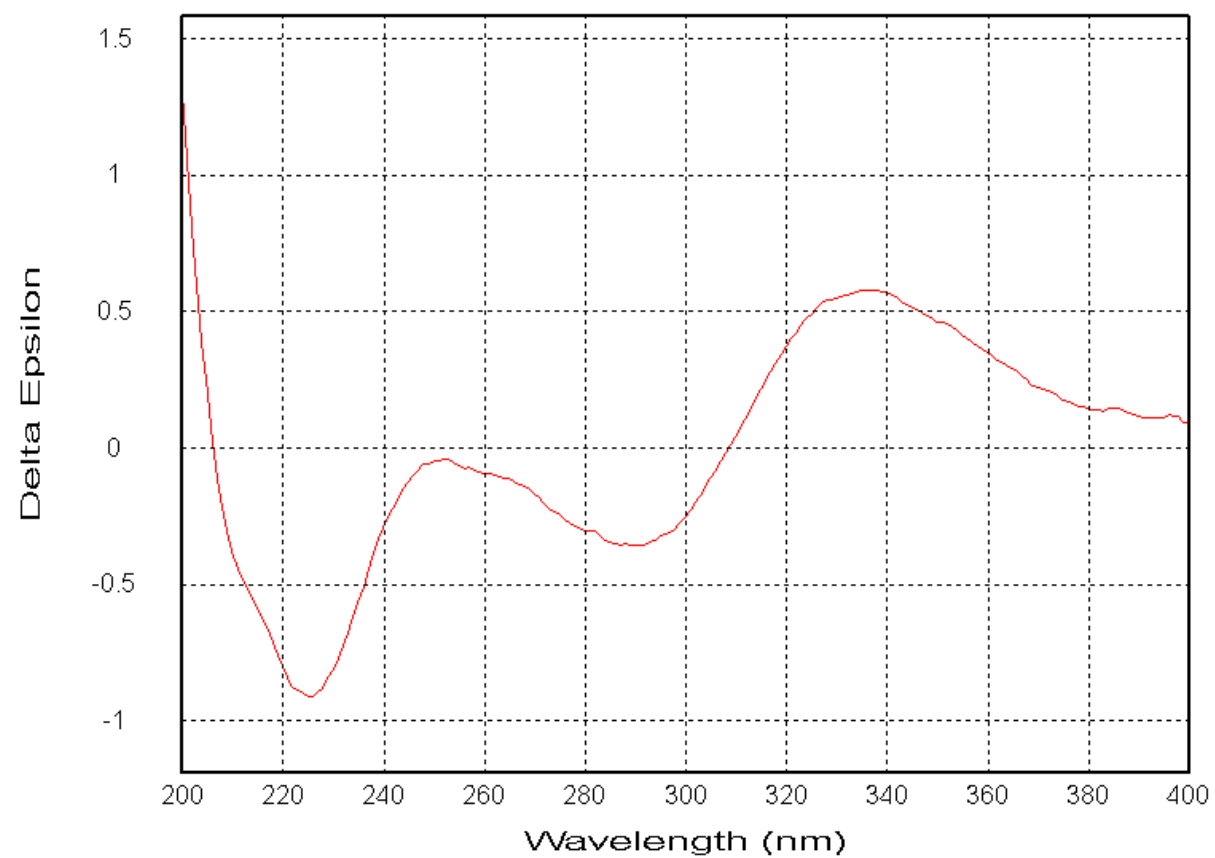

Figure S26. <sup>1</sup>H NMR spectrum of balticolid (4)

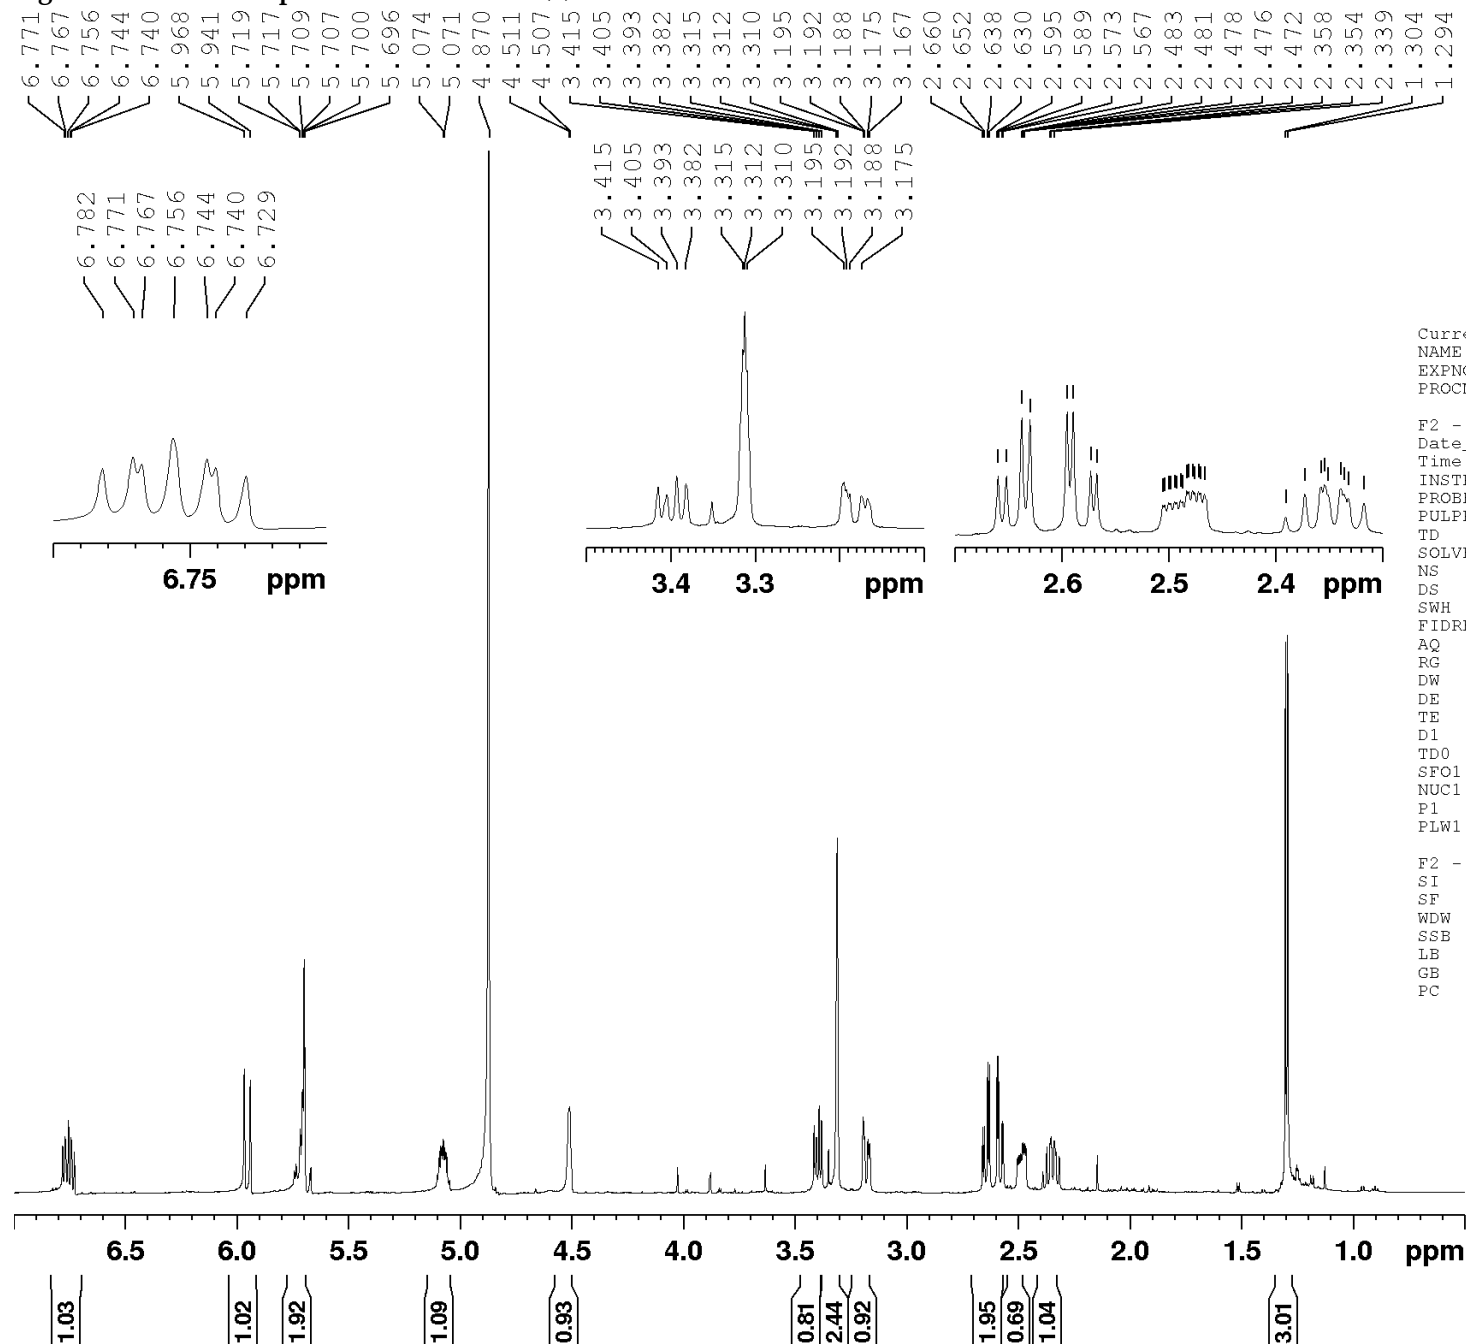

Current Data Parameters  
 NAME 168CLC-57.3-rfc60%-rp11-1H-CD3OI  
 EXPNO 1  
 PROCNO 1

F2 - Acquisition Parameters  
 Date\_ 20180709  
 Time\_ 11.10 h  
 INSTRUM spect  
 PROBHD Z114607\_0270 (   
 PULPROG zg30  
 TD 65536  
 SOLVENT MeOD  
 NS 64  
 DS 2  
 SWH 12019.230 Hz  
 FIDRES 0.366798 Hz  
 AQ 2.7262976 sec  
 RG 86.2  
 DW 41.600 usec  
 DE 6.50 usec  
 TE 296.5 K  
 D1 1.00000000 sec  
 TD0 1  
 SFO1 600.3147069 MHz  
 NUC1 1H  
 P1 10.00 usec  
 PLW1 24.25499916 W

F2 - Processing parameters  
 SI 65536  
 SF 600.3110102 MHz  
 WDW EM  
 SSB 0  
 LB 0.30 Hz  
 GB 0  
 PC 1.00

Figure S27.  $^{13}\text{C}$  NMR spectrum of balticolid (4)

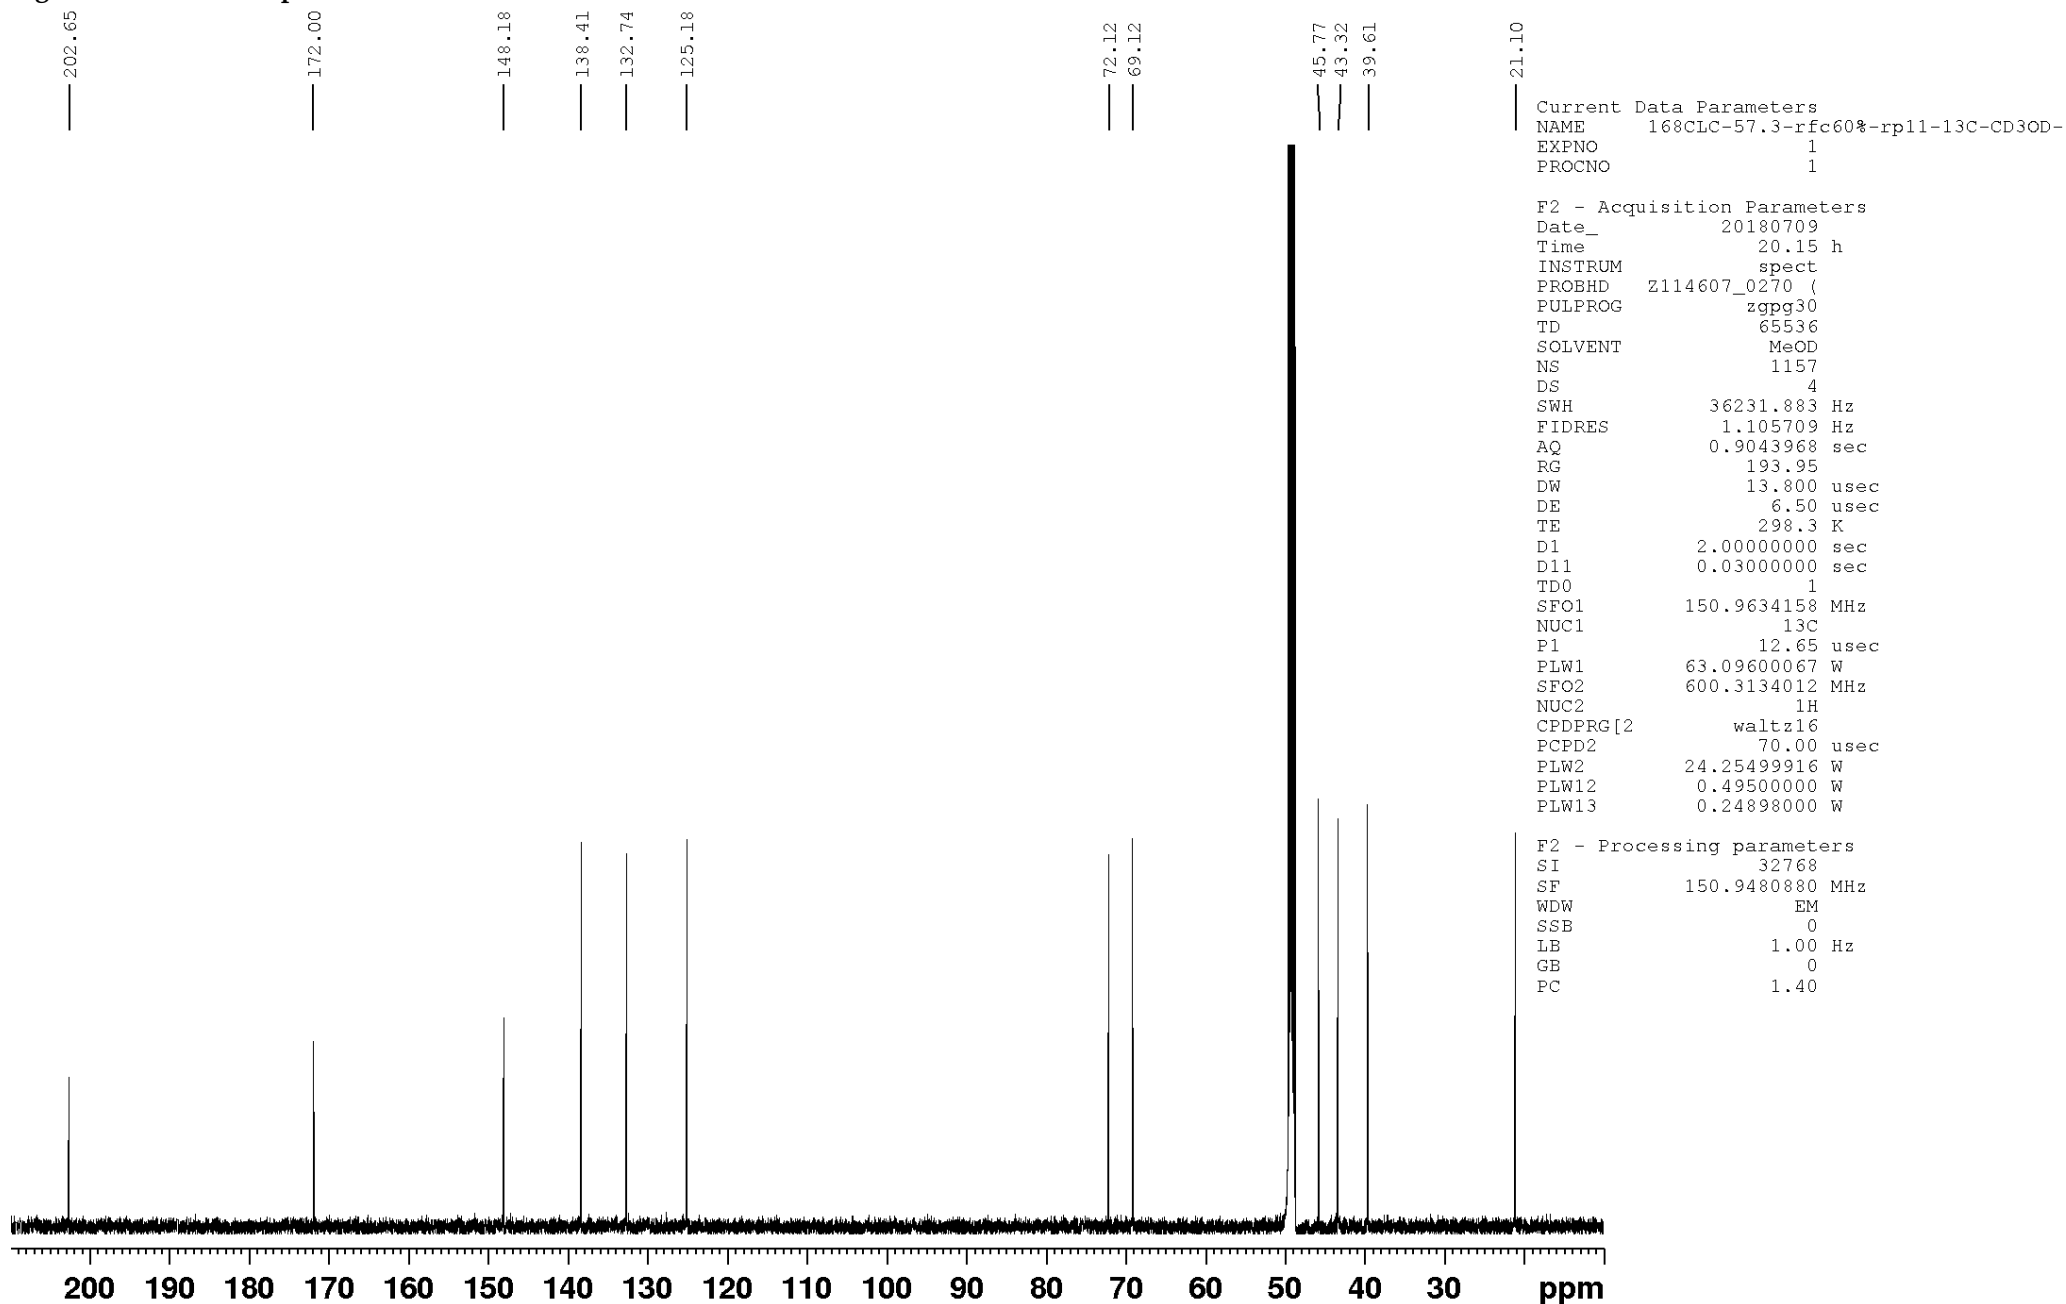

Figure S28. <sup>1</sup>H NMR spectrum of dendrodolide G (5)

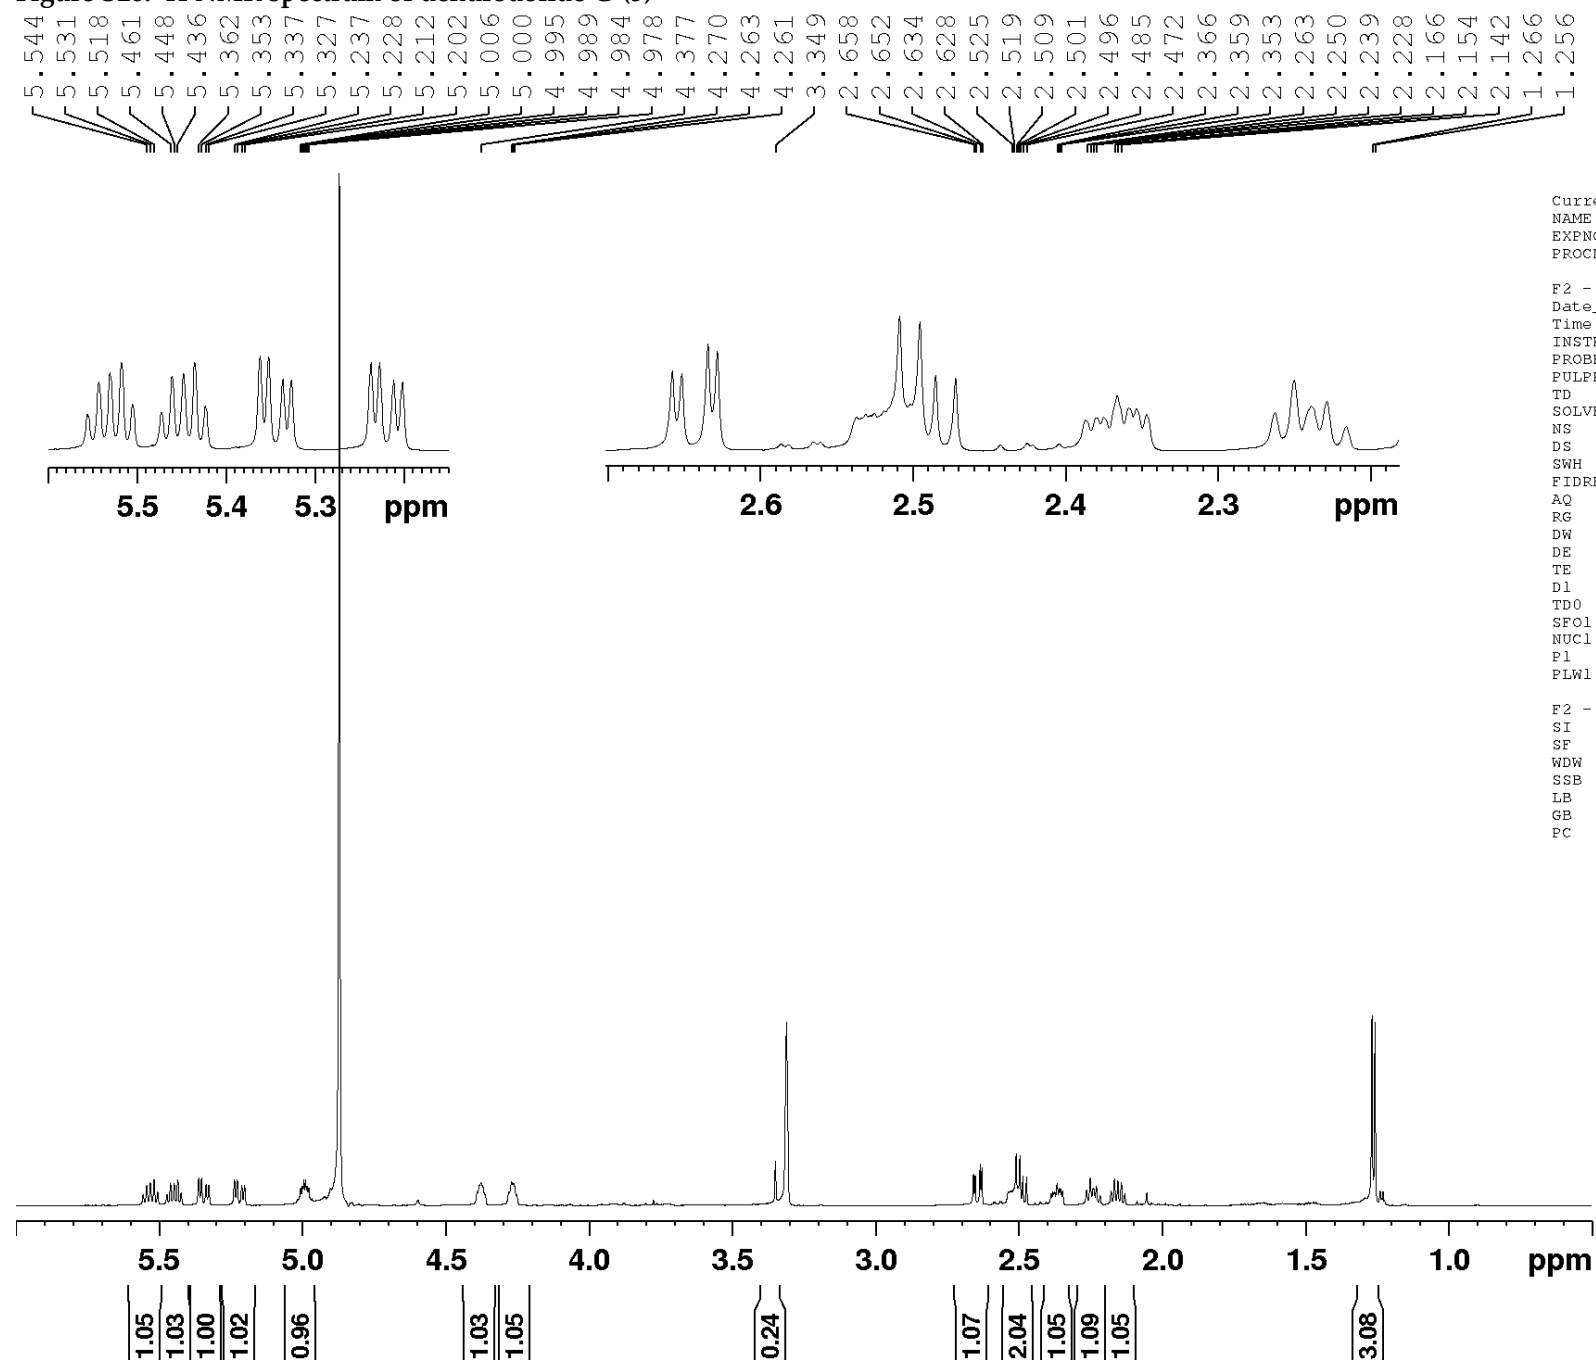

Current Data Parameters  
NAME 168CLC-57.3-rfc60%-rp19-1H-CD3OD  
EXPNO 1  
PROCNO 1

F2 - Acquisition Parameters  
Date\_ 20180709  
Time 13.05 h  
INSTRUM spect  
PROBHD Z114607\_0270 (   
PULPROG zg30  
TD 65536  
SOLVENT MeOD  
NS 64  
DS 2  
SWH 12019.230 Hz  
FIDRES 0.366798 Hz  
AQ 2.7262976 sec  
RG 96.46  
DW 41.600 usec  
DE 6.50 usec  
TE 296.4 K  
D1 1.00000000 sec  
TD0 1  
SF01 600.3147069 MHz  
NUC1 1H  
P1 10.00 usec  
PLW1 24.25499916 W

F2 - Processing parameters  
SI 65536  
SF 600.3110118 MHz  
WDW EM  
SSB 0  
LB 0.30 Hz  
GB 0  
PC 1.00

Figure S29.  $^{13}\text{C}$  NMR spectrum of dendrodolide G (5)

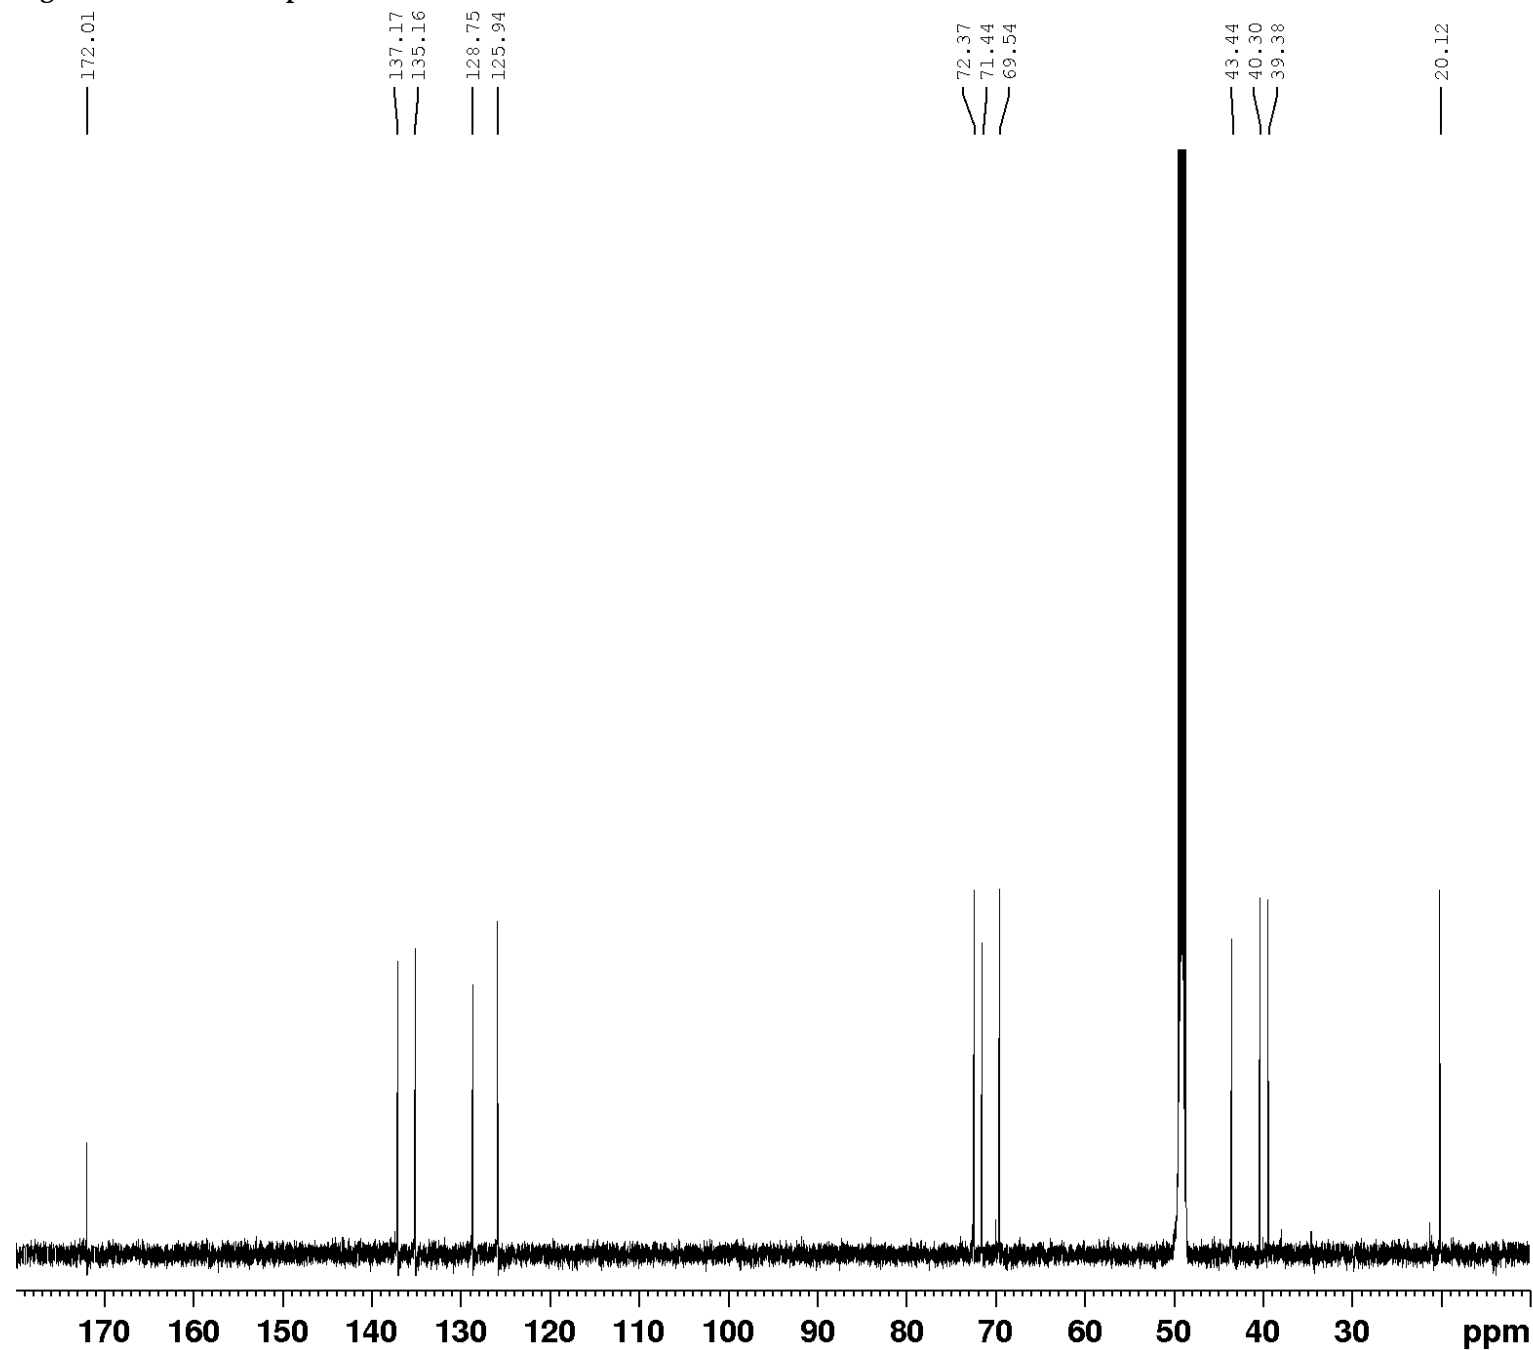

Current Data Parameters  
 NAME 168CLC-57.3-rfc60%-rp19-13C-CD3OD  
 EXPNO 1  
 PROCNO 1

F2 - Acquisition Parameters  
 Date\_ 20180710  
 Time 0.25 h  
 INSTRUM spect  
 PROBHD Z114607\_0270 (  
 PULPROG zgpg30  
 TD 65536  
 SOLVENT MeOD  
 NS 1165  
 DS 4  
 SWH 36231.883 Hz  
 FIDRES 1.105709 Hz  
 AQ 0.9043968 sec  
 RG 193.95  
 DW 13.800 usec  
 DE 6.50 usec  
 TE 298.4 K  
 D1 2.00000000 sec  
 D11 0.03000000 sec  
 TD0 1  
 SFO1 150.9634158 MHz  
 NUC1 13C  
 P1 12.65 usec  
 PLW1 63.09600067 W  
 SFO2 600.3134012 MHz  
 NUC2 1H  
 CPDPRG[2] waltz16  
 PCPD2 70.00 usec  
 PLW2 24.25499916 W  
 PLW12 0.49500000 W  
 PLW13 0.24898000 W

F2 - Processing parameters  
 SI 32768  
 SF 150.9481099 MHz  
 WDW EM  
 SSB 0  
 LB 1.00 Hz  
 GB 0  
 PC 1.40



Figure S30. <sup>1</sup>H NMR spectrum of dihydroisocoumarine (6)

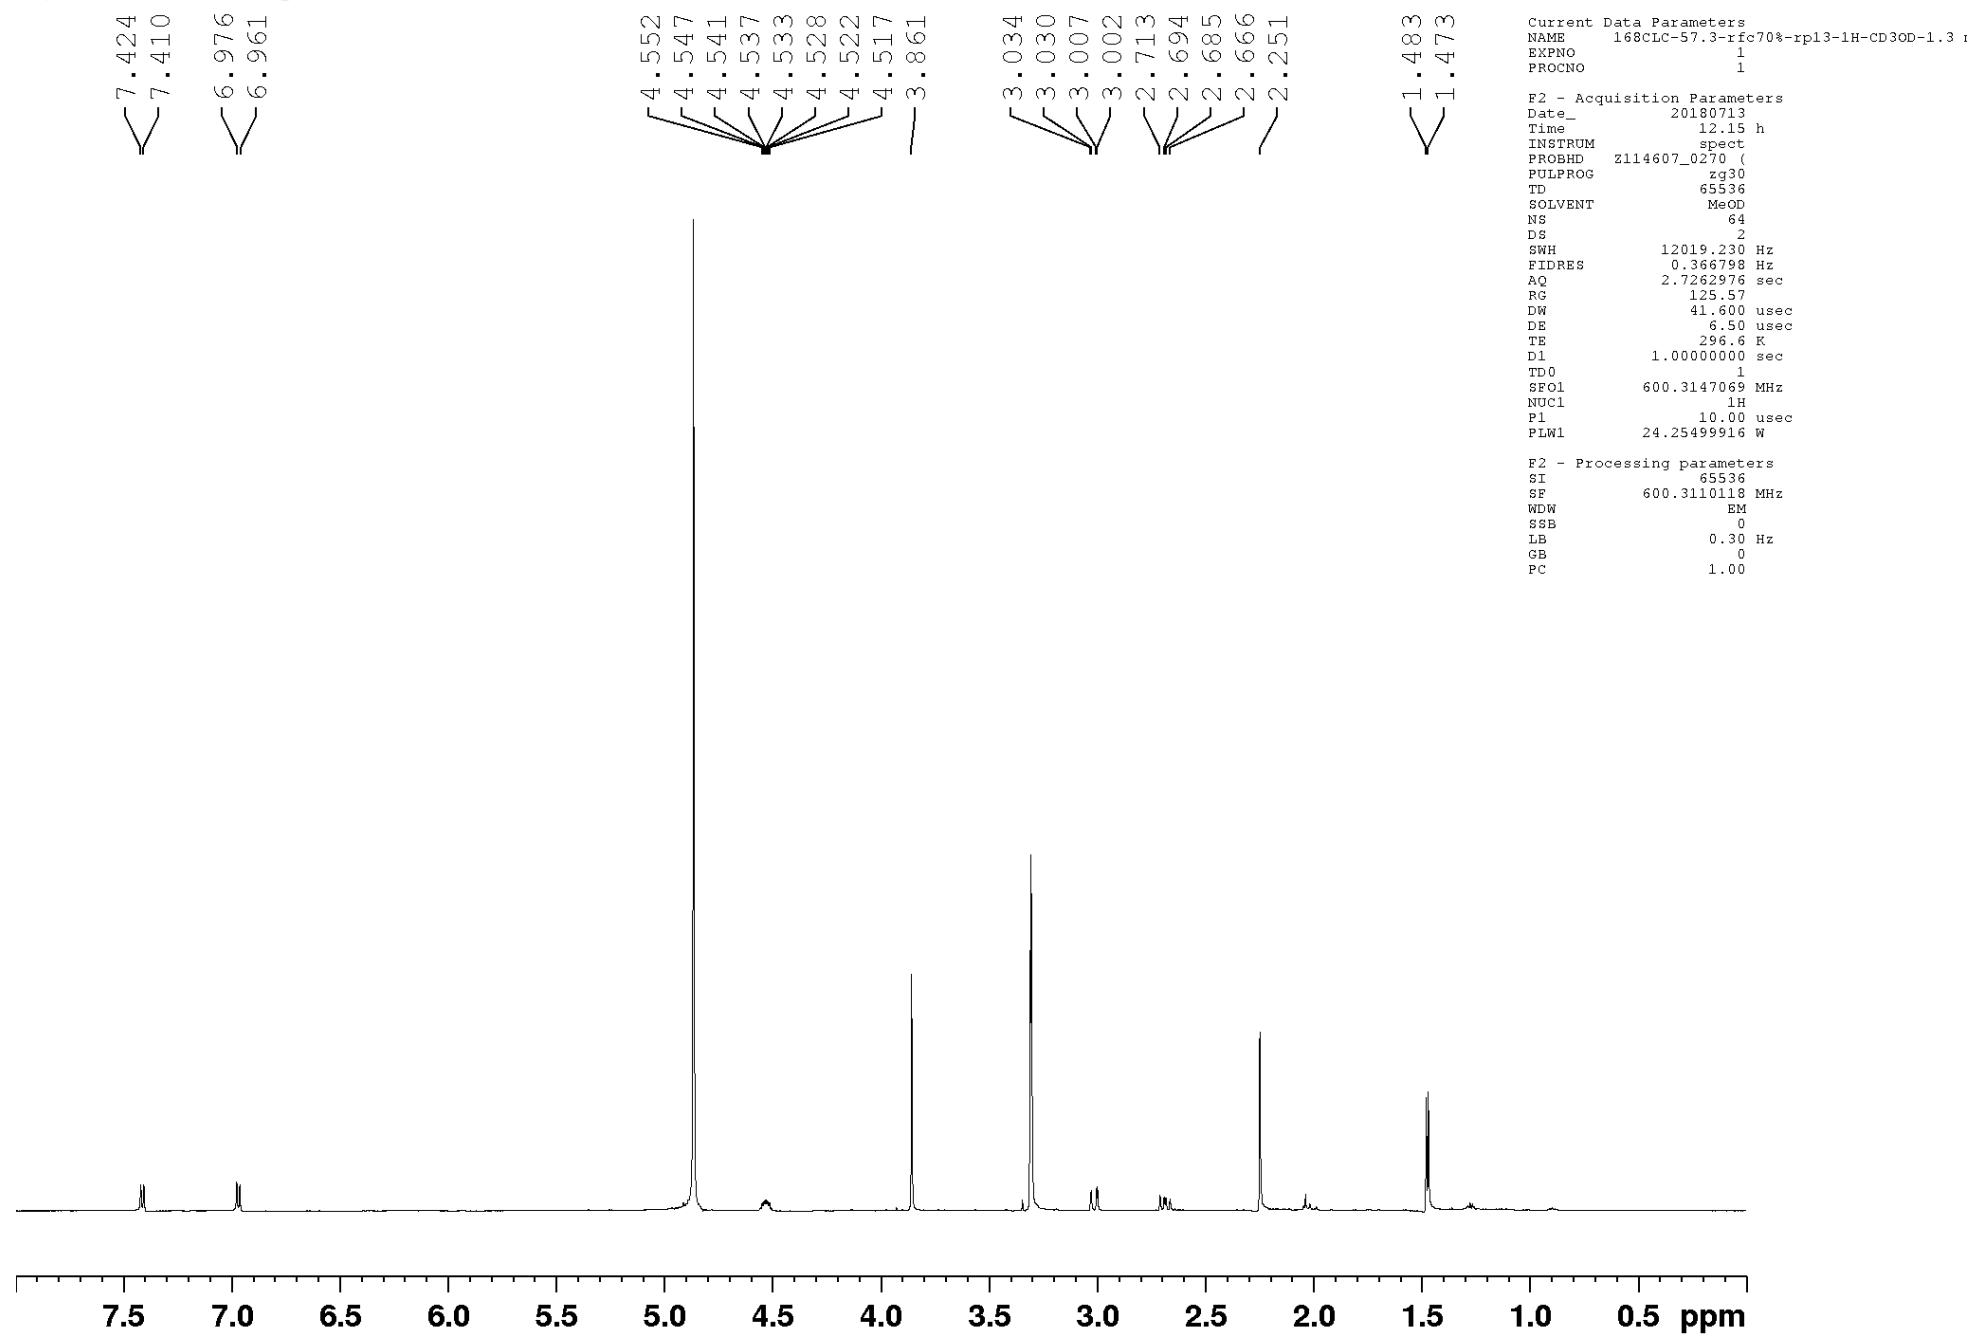

Figure S31.  $^{13}\text{C}$  NMR spectrum of dihydroisocoumarine (6)

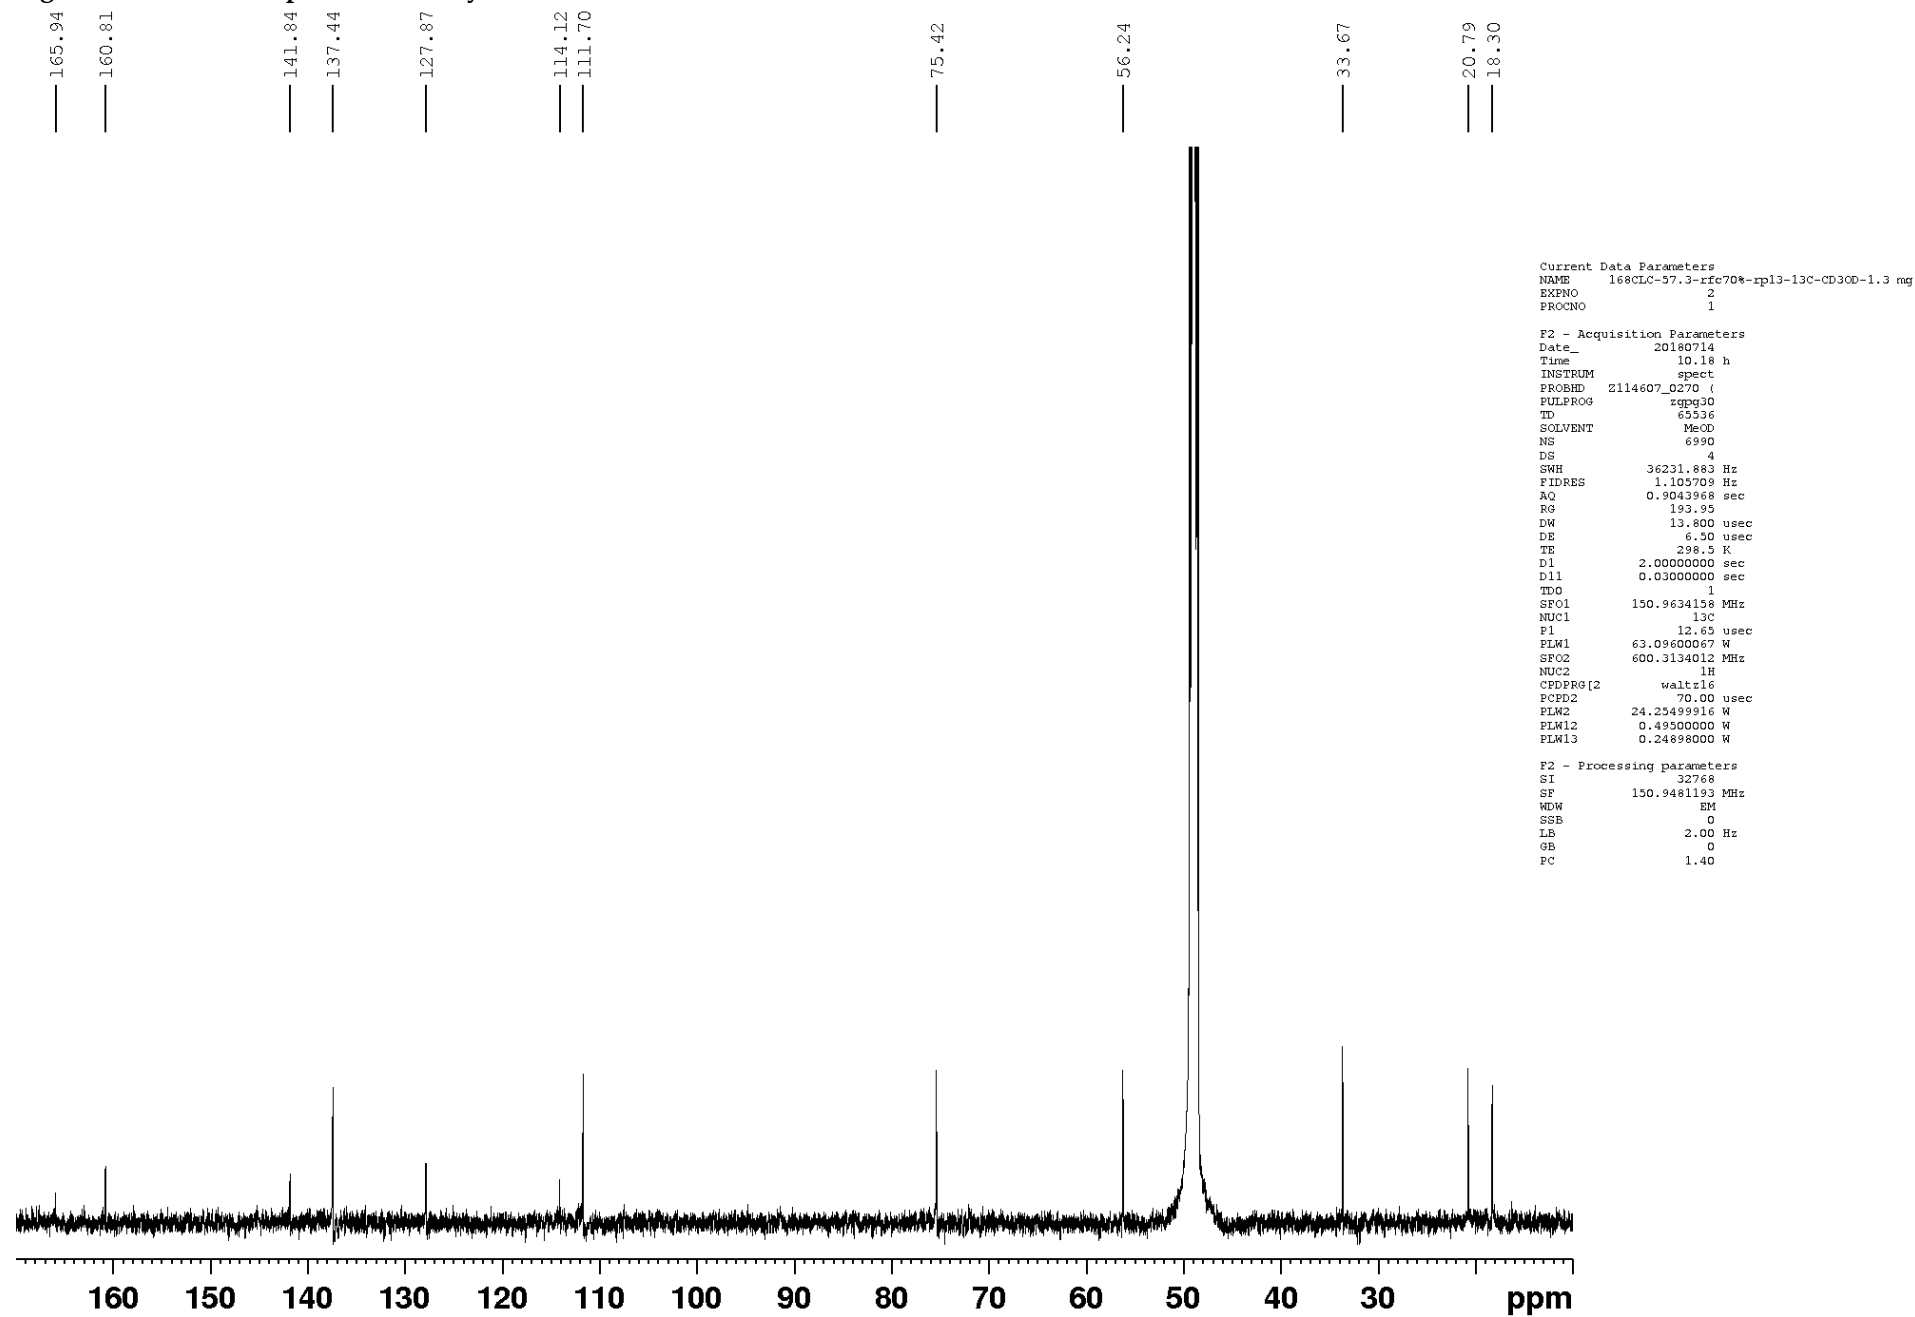

Figure S32. <sup>1</sup>H NMR spectrum of (–)-5-methylmellein (7)

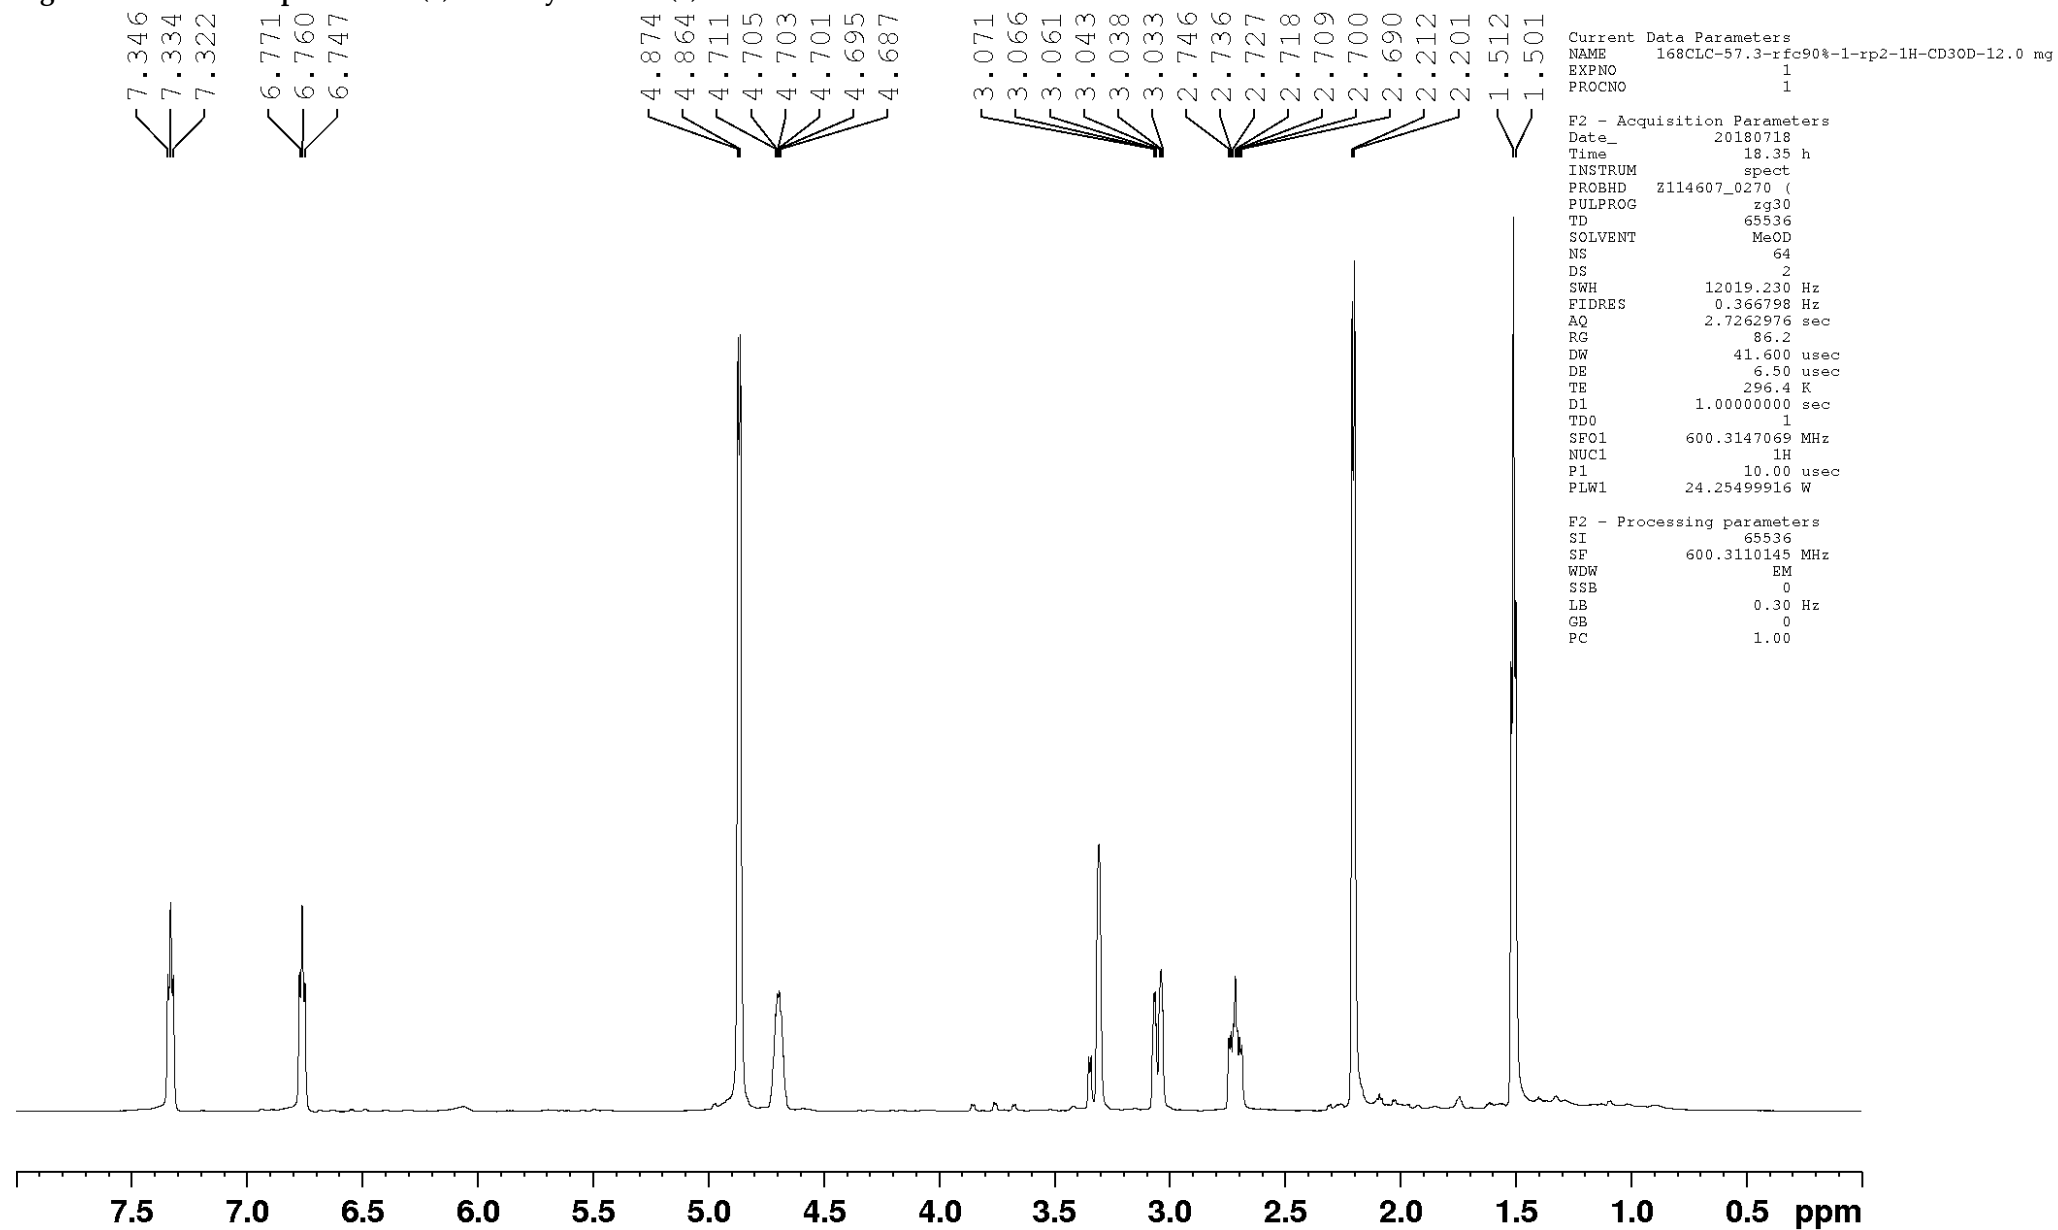

Figure S33.  $^{13}\text{C}$  NMR spectrum of (-)-5-methylmellein (7)

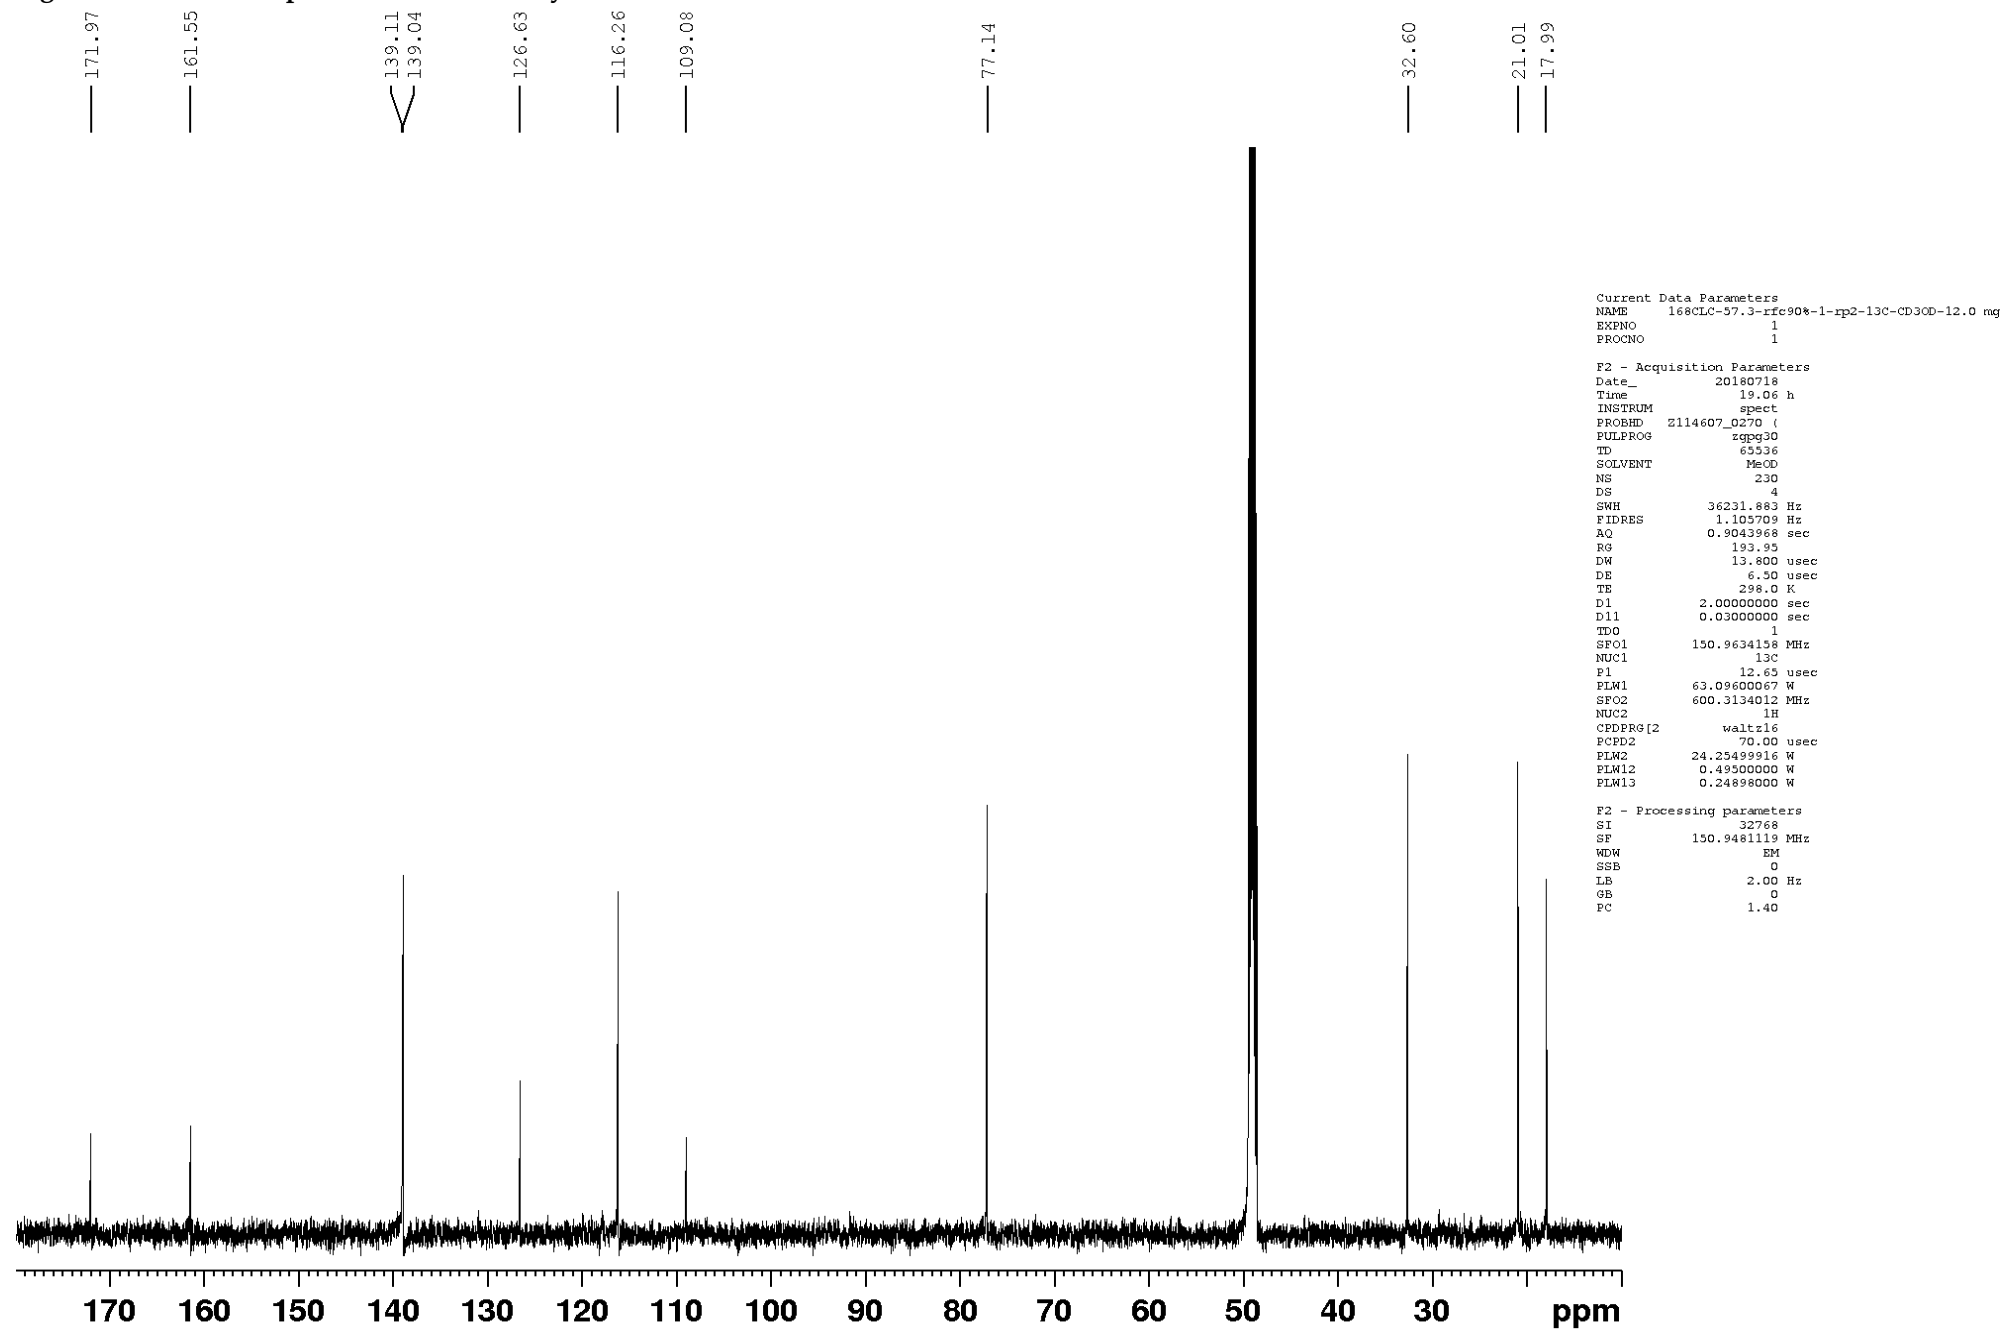

Figure S34. <sup>1</sup>H NMR spectrum of dendrodochol B (8)

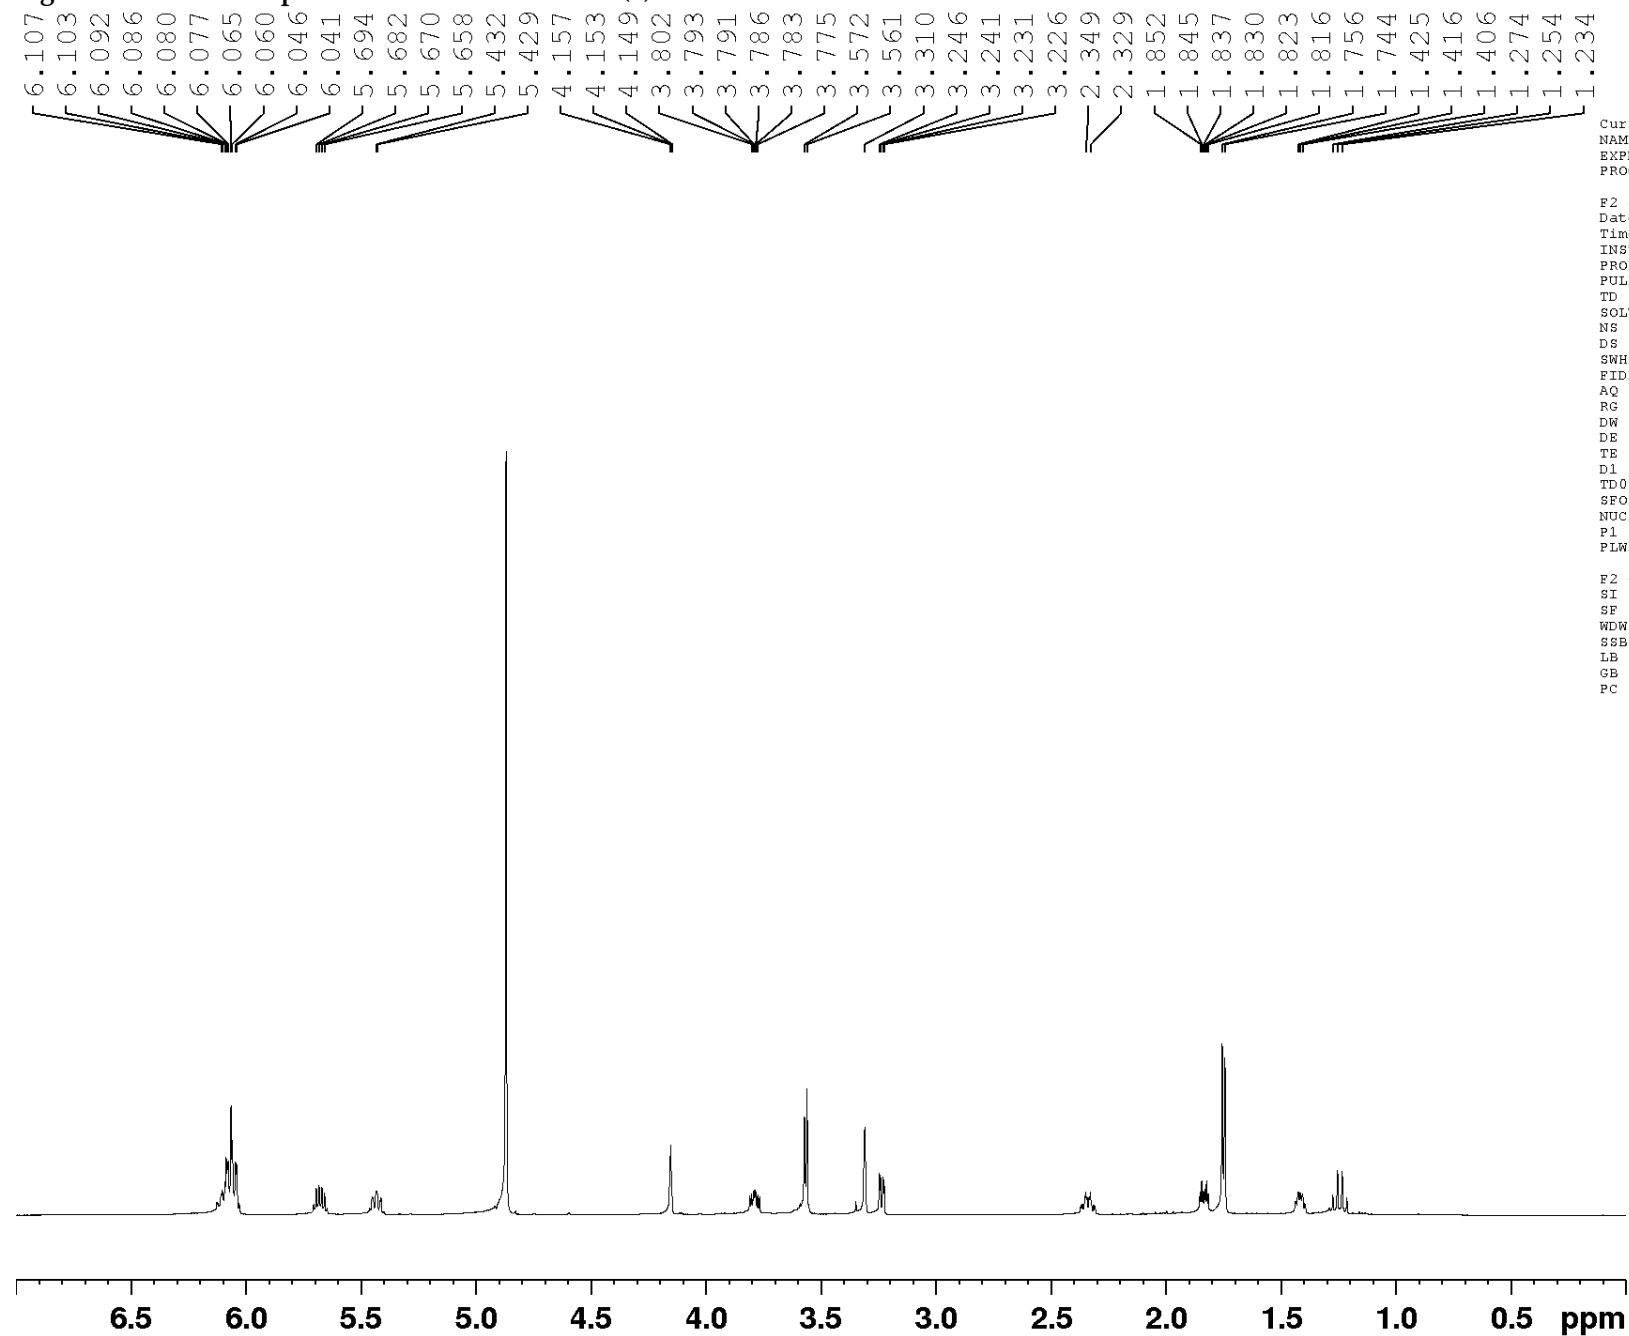

Current Data Parameters  
NAME 168CLC-57.3-rfc80%-rp9-1H-CD3OD-8.2 mg  
EXPNO 1  
PROCNO 1

F2 - Acquisition Parameters  
Date\_ 20180717  
Time 11.36 h  
INSTRUM spect  
PROBHD Z114607\_0270 (  
PULPROG zg30  
TD 65536  
SOLVENT MeOD  
NS 64  
DS 2  
SWH 12019.230 Hz  
FIDRES 0.366798 Hz  
AQ 2.7262976 sec  
RG 69.57  
DW 41.600 usec  
DE 6.50 usec  
TE 296.6 K  
D1 1.00000000 sec  
TD0 1  
SFO1 600.3147069 MHz  
NUC1 1H  
P1 10.00 usec  
PLW1 24.25499916 W

F2 - Processing parameters  
SI 65536  
SF 600.3110118 MHz  
WDW EM  
SSB 0  
LB 0.30 Hz  
GB 0  
PC 1.00

Figure S35.  $^{13}\text{C}$  NMR spectrum of dendrodochol B (8)

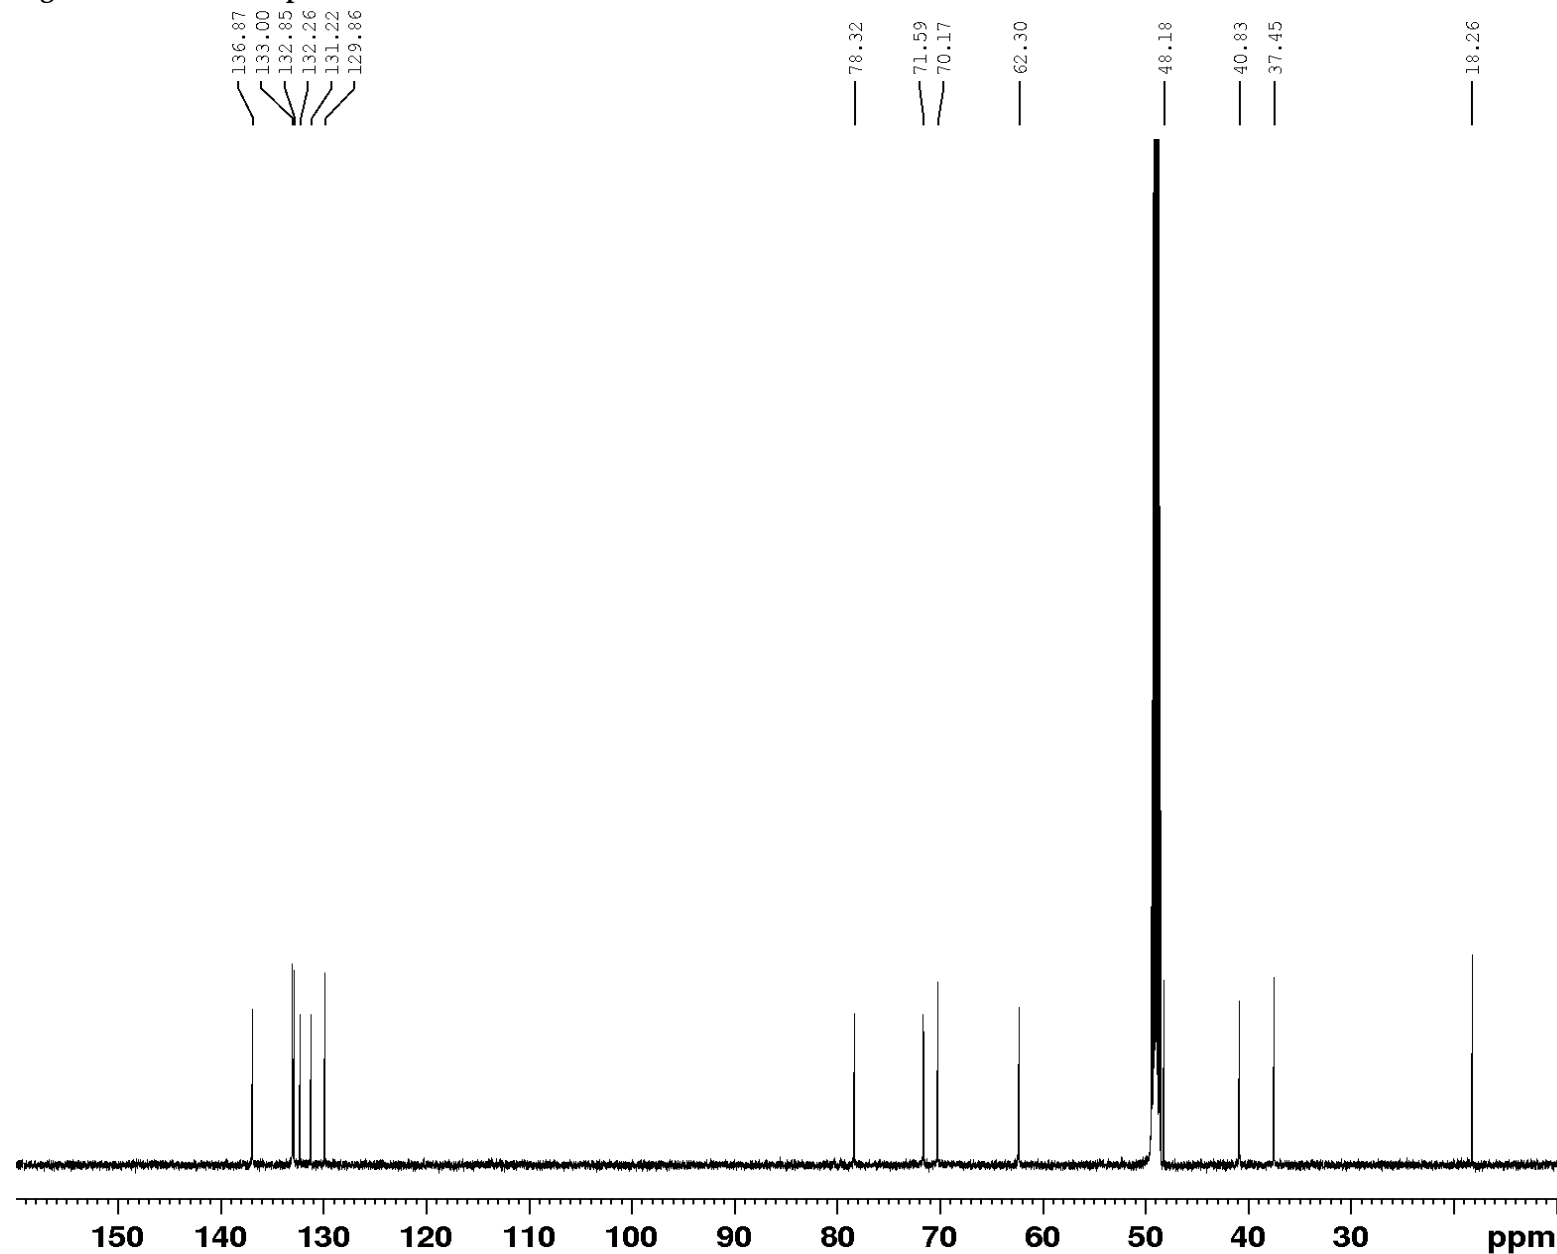

```

Current Data Parameters
NAME      168CLC-57.3-rfc80%-rp9-13c-CD3OD
EXPNO     2
PROCNO    1

F2 - Acquisition Parameters
Date_     20180718
Time      13.41 h
INSTRUM   spect
PROBHD    Z114607_0270 (
PULPROG   zgpg30
TD         65536
SOLVENT   MeOD
NS         532
DS         4
SWH        36231.883 Hz
FIDRES     1.105709 Hz
AQ         0.9043968 sec
RG         193.95
DW         13.800 usec
DE         6.50 usec
TE         298.0 K
D1         2.00000000 sec
D11        0.03000000 sec
TD0        1
SFO1       150.9634158 MHz
NUC1       13C
P1         12.65 usec
PLW1       63.09600067 W
SFO2       600.3134012 MHz
NUC2       1H
CPDPRG[2] waltz16
PCPD2      70.00 usec
PLW2       24.25499916 W
PLW12      0.49500000 W
PLW13      0.24898000 W

F2 - Processing parameters
SI         32768
SF         150.9481236 MHz
WDW        EM
SSB        0
LB         1.00 Hz
GB         0
PC         1.40
    
```

Figure S36. <sup>1</sup>H NMR spectrum of 1-O-acetyldendrochol B (9)

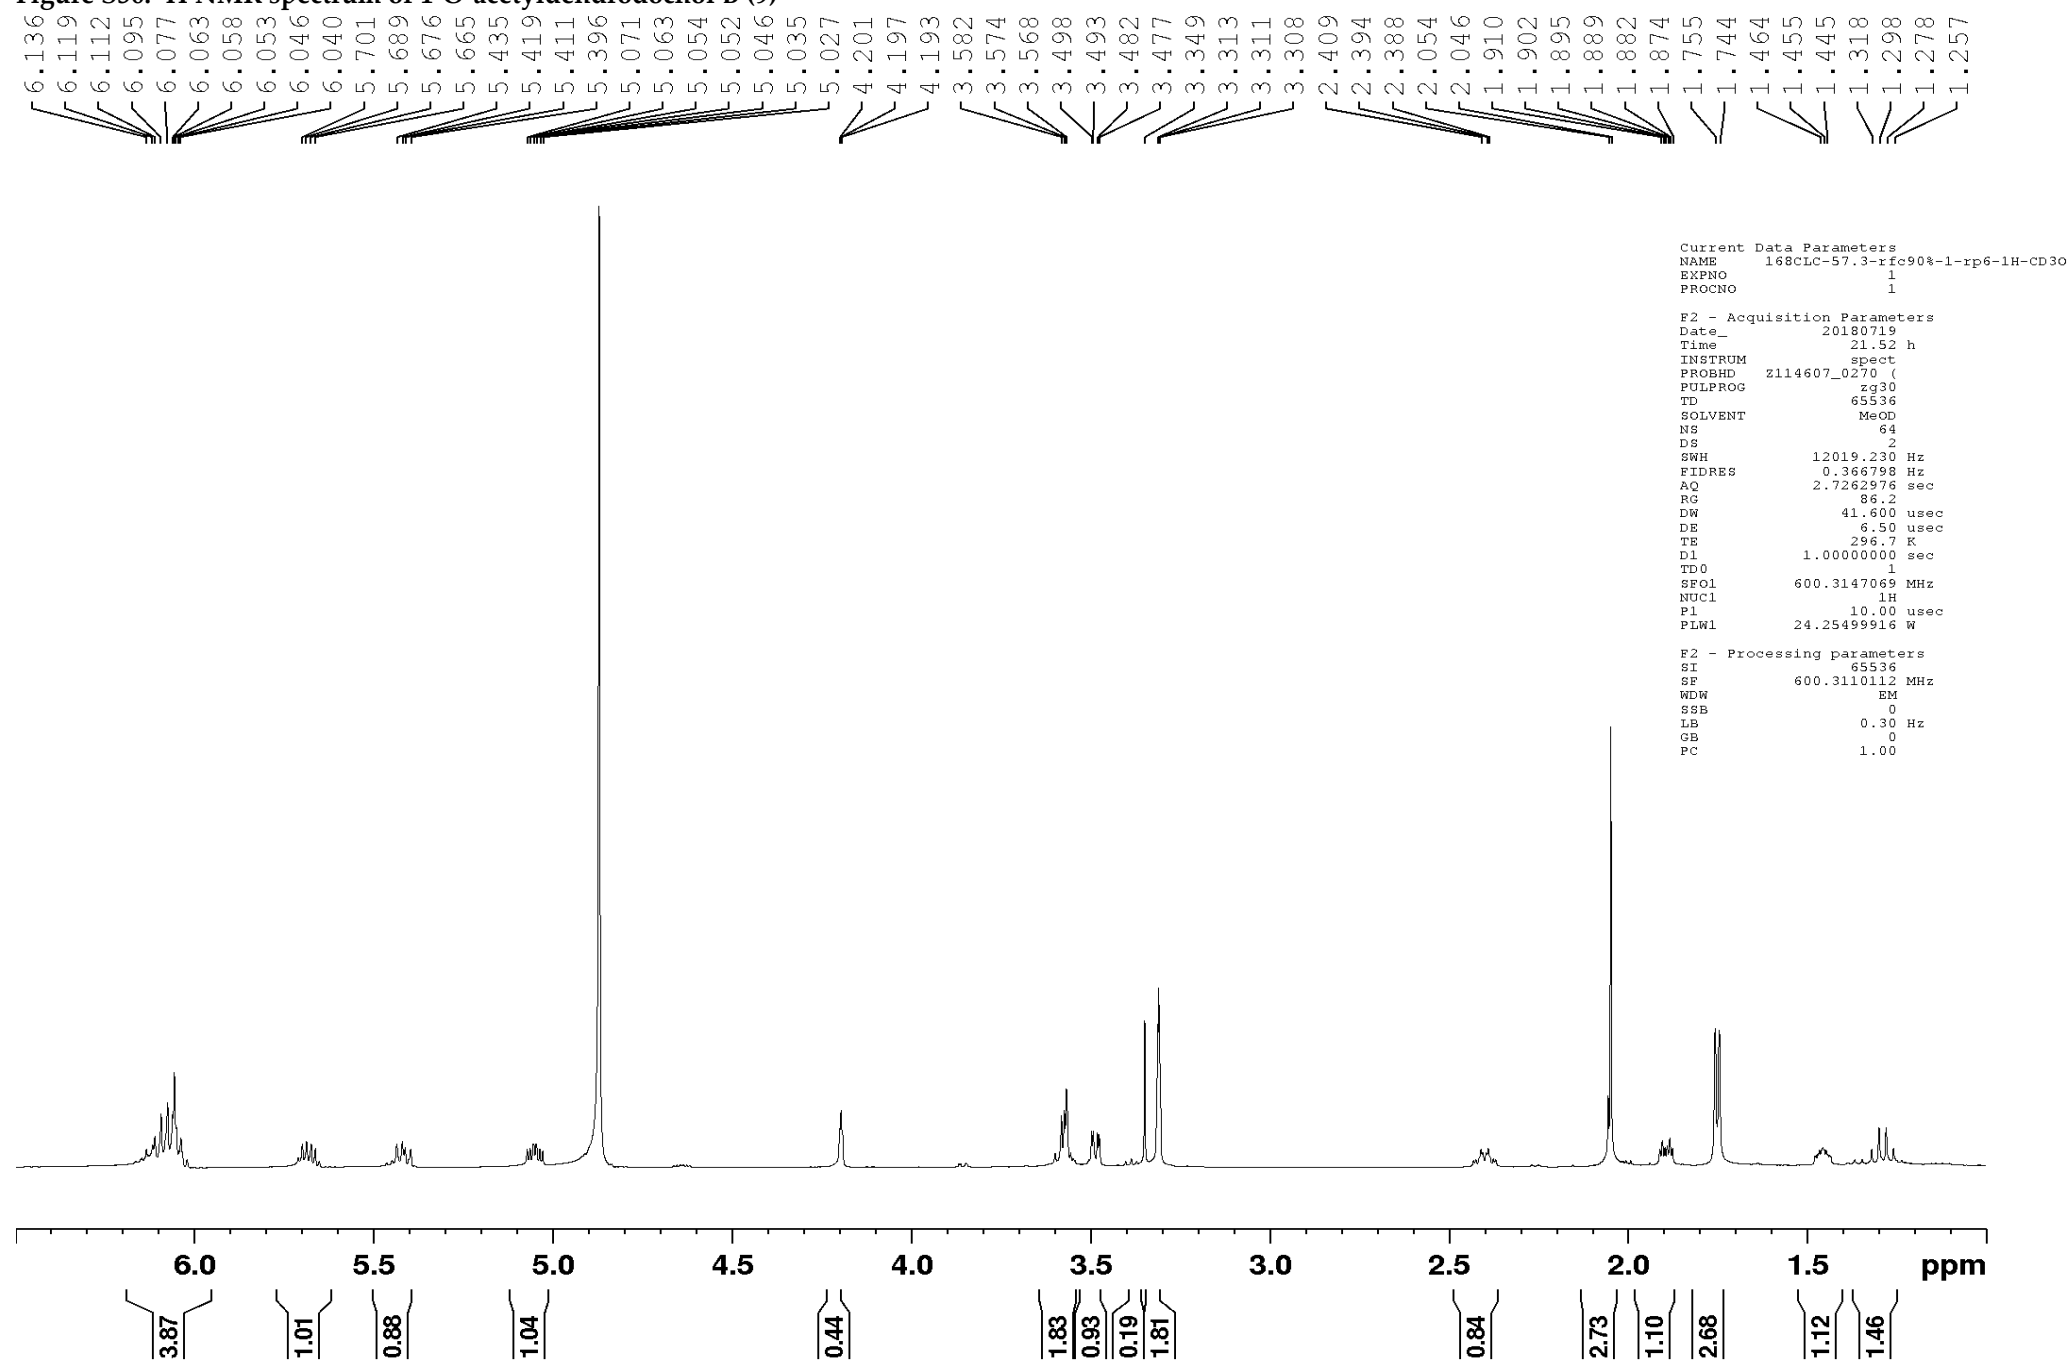

1.476  
1.473  
1.468  
1.464  
1.455  
1.445  
1.440  
1.436  
1.433

1.318  
1.298  
1.278  
1.257

Current Data Parameters  
NAME 168CLC-57.3-rfc90%-1-rp6-1H-CD3O  
EXPNO 1  
PROCNO 1

F2 - Acquisition Parameters  
Date\_ 20180719  
Time 21.52 h  
INSTRUM spect  
PROBHD Z114607\_0270 (  
PULPROG zg30  
TD 65536  
SOLVENT MeOD  
NS 64  
DS 2  
SWH 12019.230 Hz  
FIDRES 0.368798 Hz  
AQ 2.7262976 sec  
RG 86.2  
DW 41.600 usec  
DE 6.50 usec  
TE 296.7 K  
D1 1.00000000 sec  
TD0 1  
SFO1 600.3147069 MHz  
NUC1 1H  
P1 10.00 usec  
PLW1 24.25499916 W

F2 - Processing parameters  
SI 65536  
SF 600.3110112 MHz  
WDW EM  
SSB 0  
LB 0.30 Hz  
GB 0  
PC 1.00

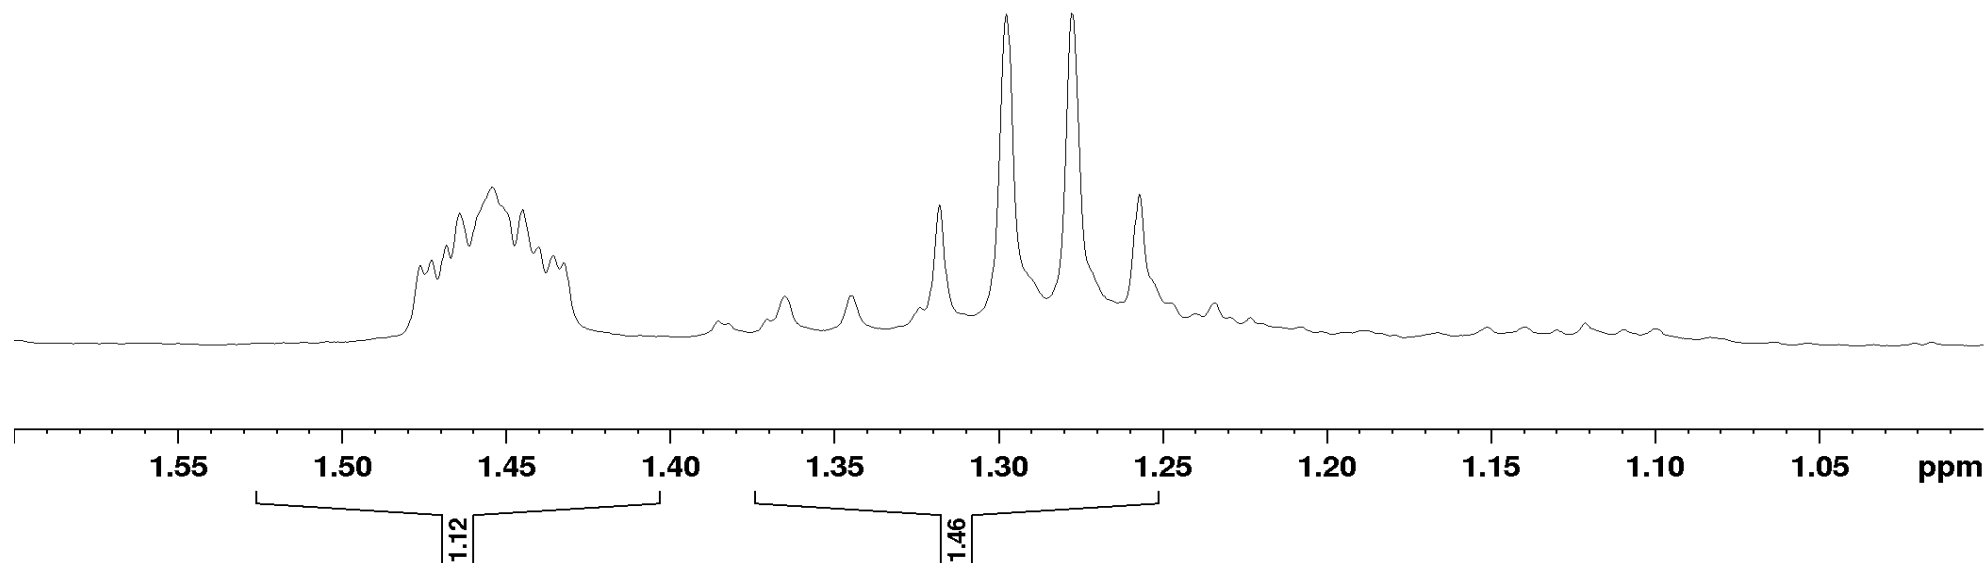



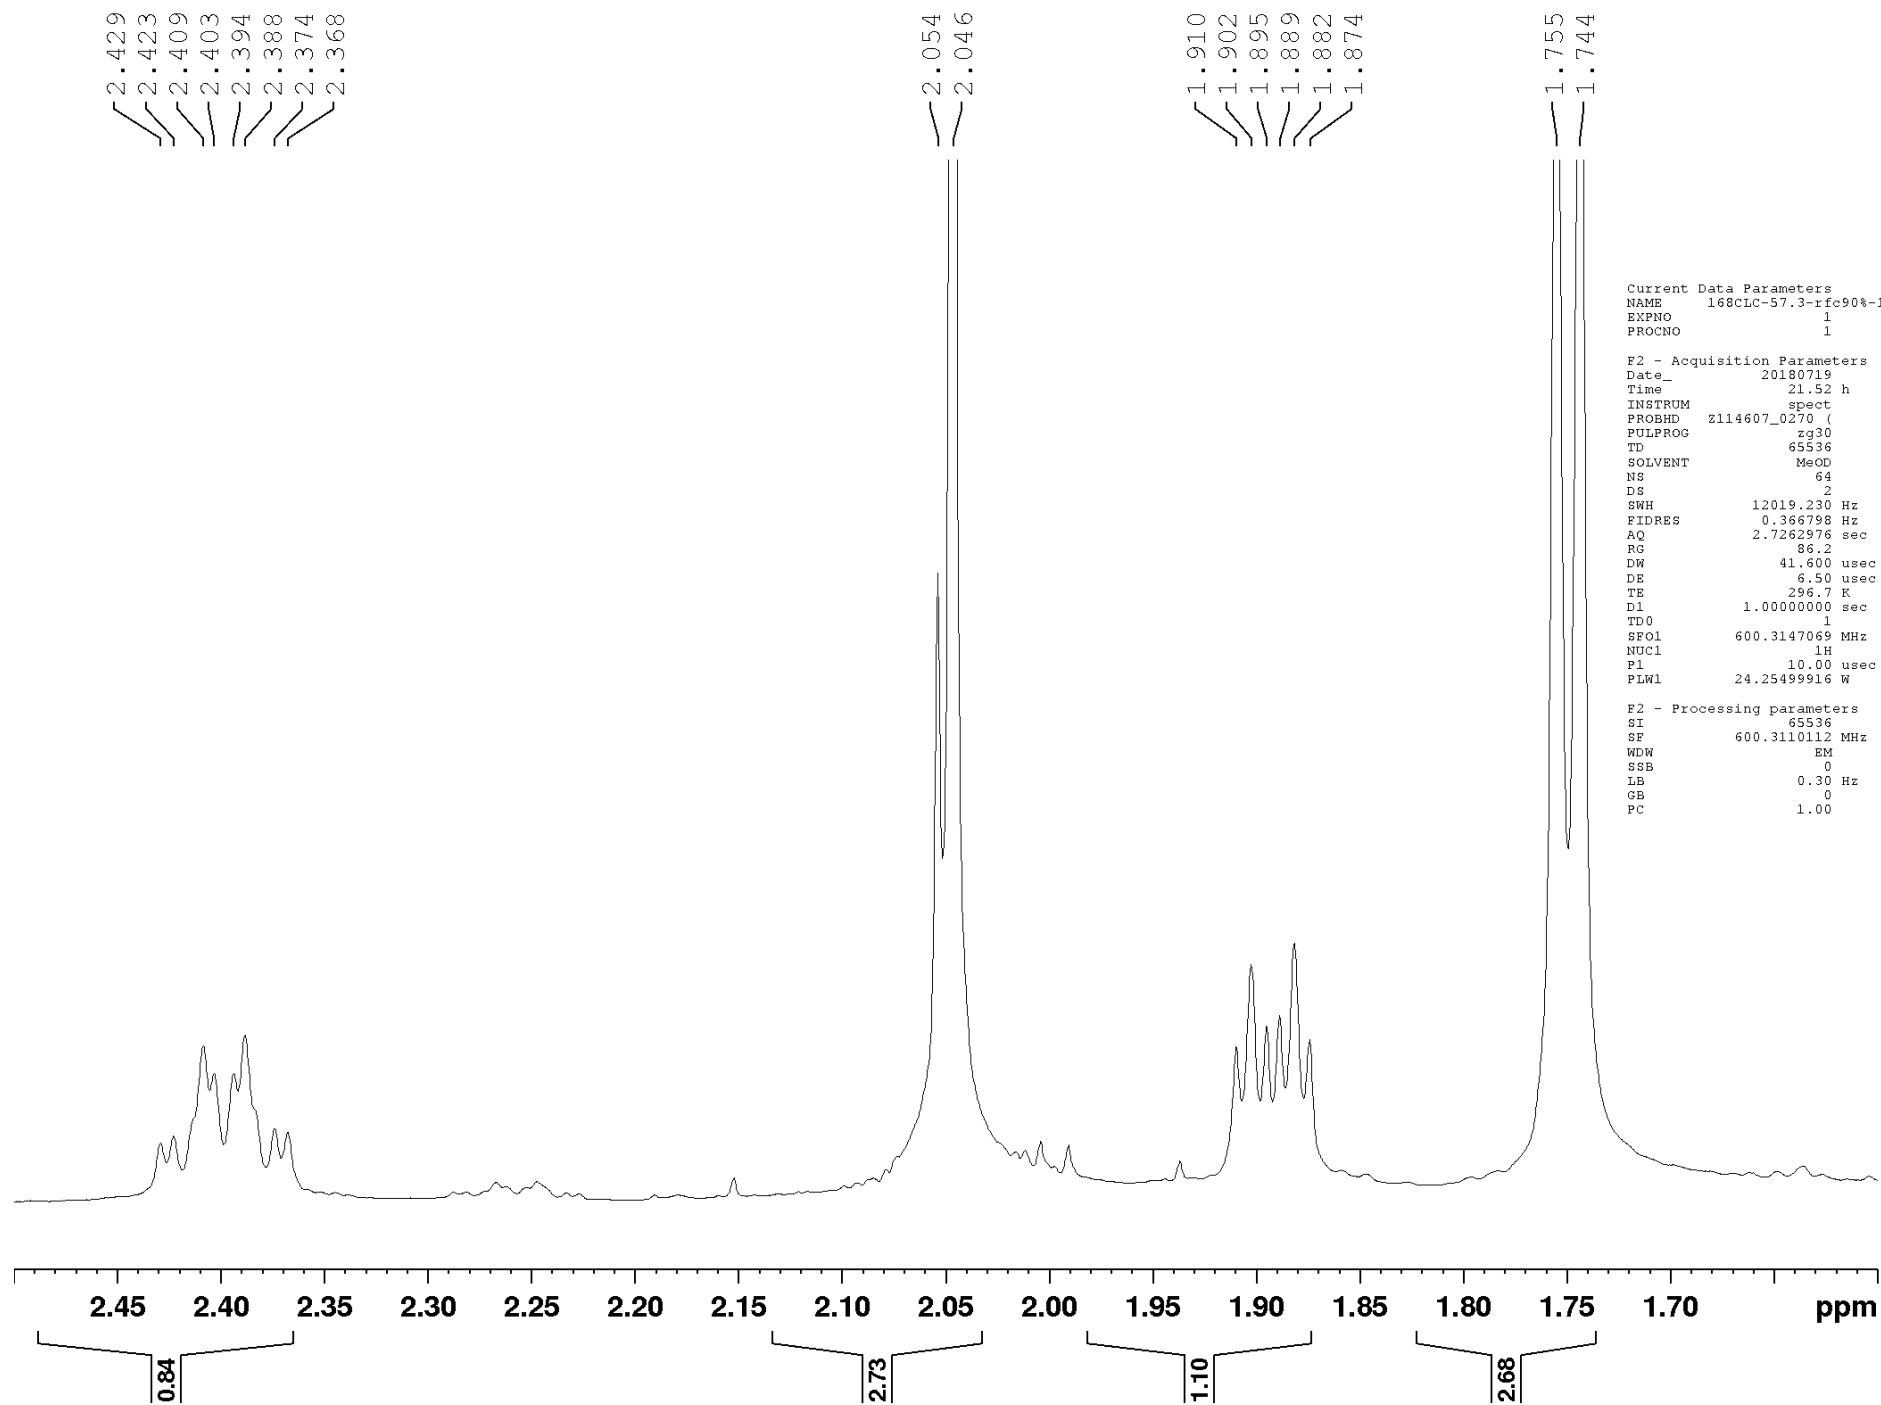

Current Data Parameters  
NAME 168CLC-57.3-rfc90%-1-rp6-1H-CD3O  
EXPNO 1  
PROCNO 1

F2 - Acquisition Parameters  
Date\_ 20180719  
Time 21.52 h  
INSTRUM spect  
PROBHD Z114607\_0270 (  
PULPROG zg30  
TD 65536  
SOLVENT MeOD  
NS 64  
DS 2  
SWH 12019.230 Hz  
FIDRES 0.366798 Hz  
AQ 2.7262976 sec  
RG 86.2  
DW 41.600 usec  
DE 6.50 usec  
TE 296.7 K  
D1 1.00000000 sec  
TD0 1  
SFO1 600.3147069 MHz  
NUC1 1H  
P1 10.00 usec  
PLW1 24.25499916 W

F2 - Processing parameters  
SI 65536  
SF 600.3110112 MHz  
WDW EM  
SSB 0  
LB 0.30 Hz  
GB 0  
PC 1.00

— 2.429  
— 2.423  
  
— 2.409  
— 2.403  
— 2.394  
— 2.388  
  
— 2.374  
— 2.368

Current Data Parameters  
NAME 168CLC-57.3-rfc90%-1-rp6-1H-CD3O  
EXPNO 1  
PROCNO 1

F2 - Acquisition Parameters  
Date\_ 20180719  
Time 21.52 h  
INSTRUM spect  
PROBHD Z114607\_0270 (  
PULPROG zg30  
TD 65536  
SOLVENT MeOD  
NS 64  
DS 2  
SWH 12019.230 Hz  
FIDRES 0.366798 Hz  
AQ 2.7262976 sec  
RG 86.2  
DW 41.600 usec  
DE 6.50 usec  
TE 296.7 K  
D1 1.00000000 sec  
TD0 1  
SFO1 600.3147069 MHz  
NUC1 1H  
P1 10.00 usec  
PLW1 24.25499916 W

F2 - Processing parameters  
SI 65536  
SF 600.3110112 MHz  
WDW EM  
SSB 0  
LB 0.30 Hz  
GB 0  
PC 1.00

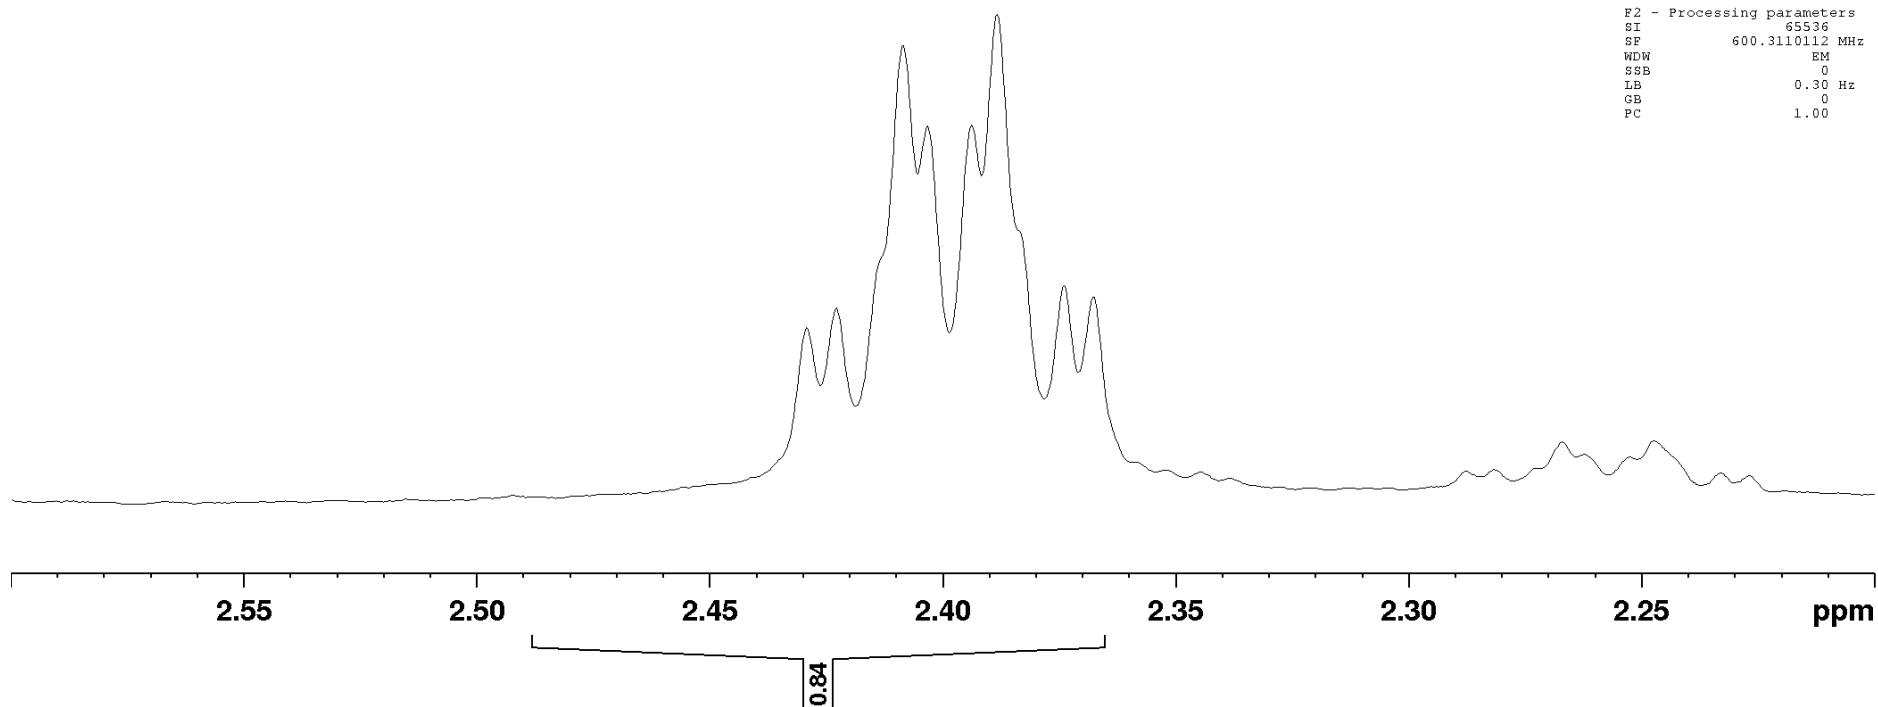

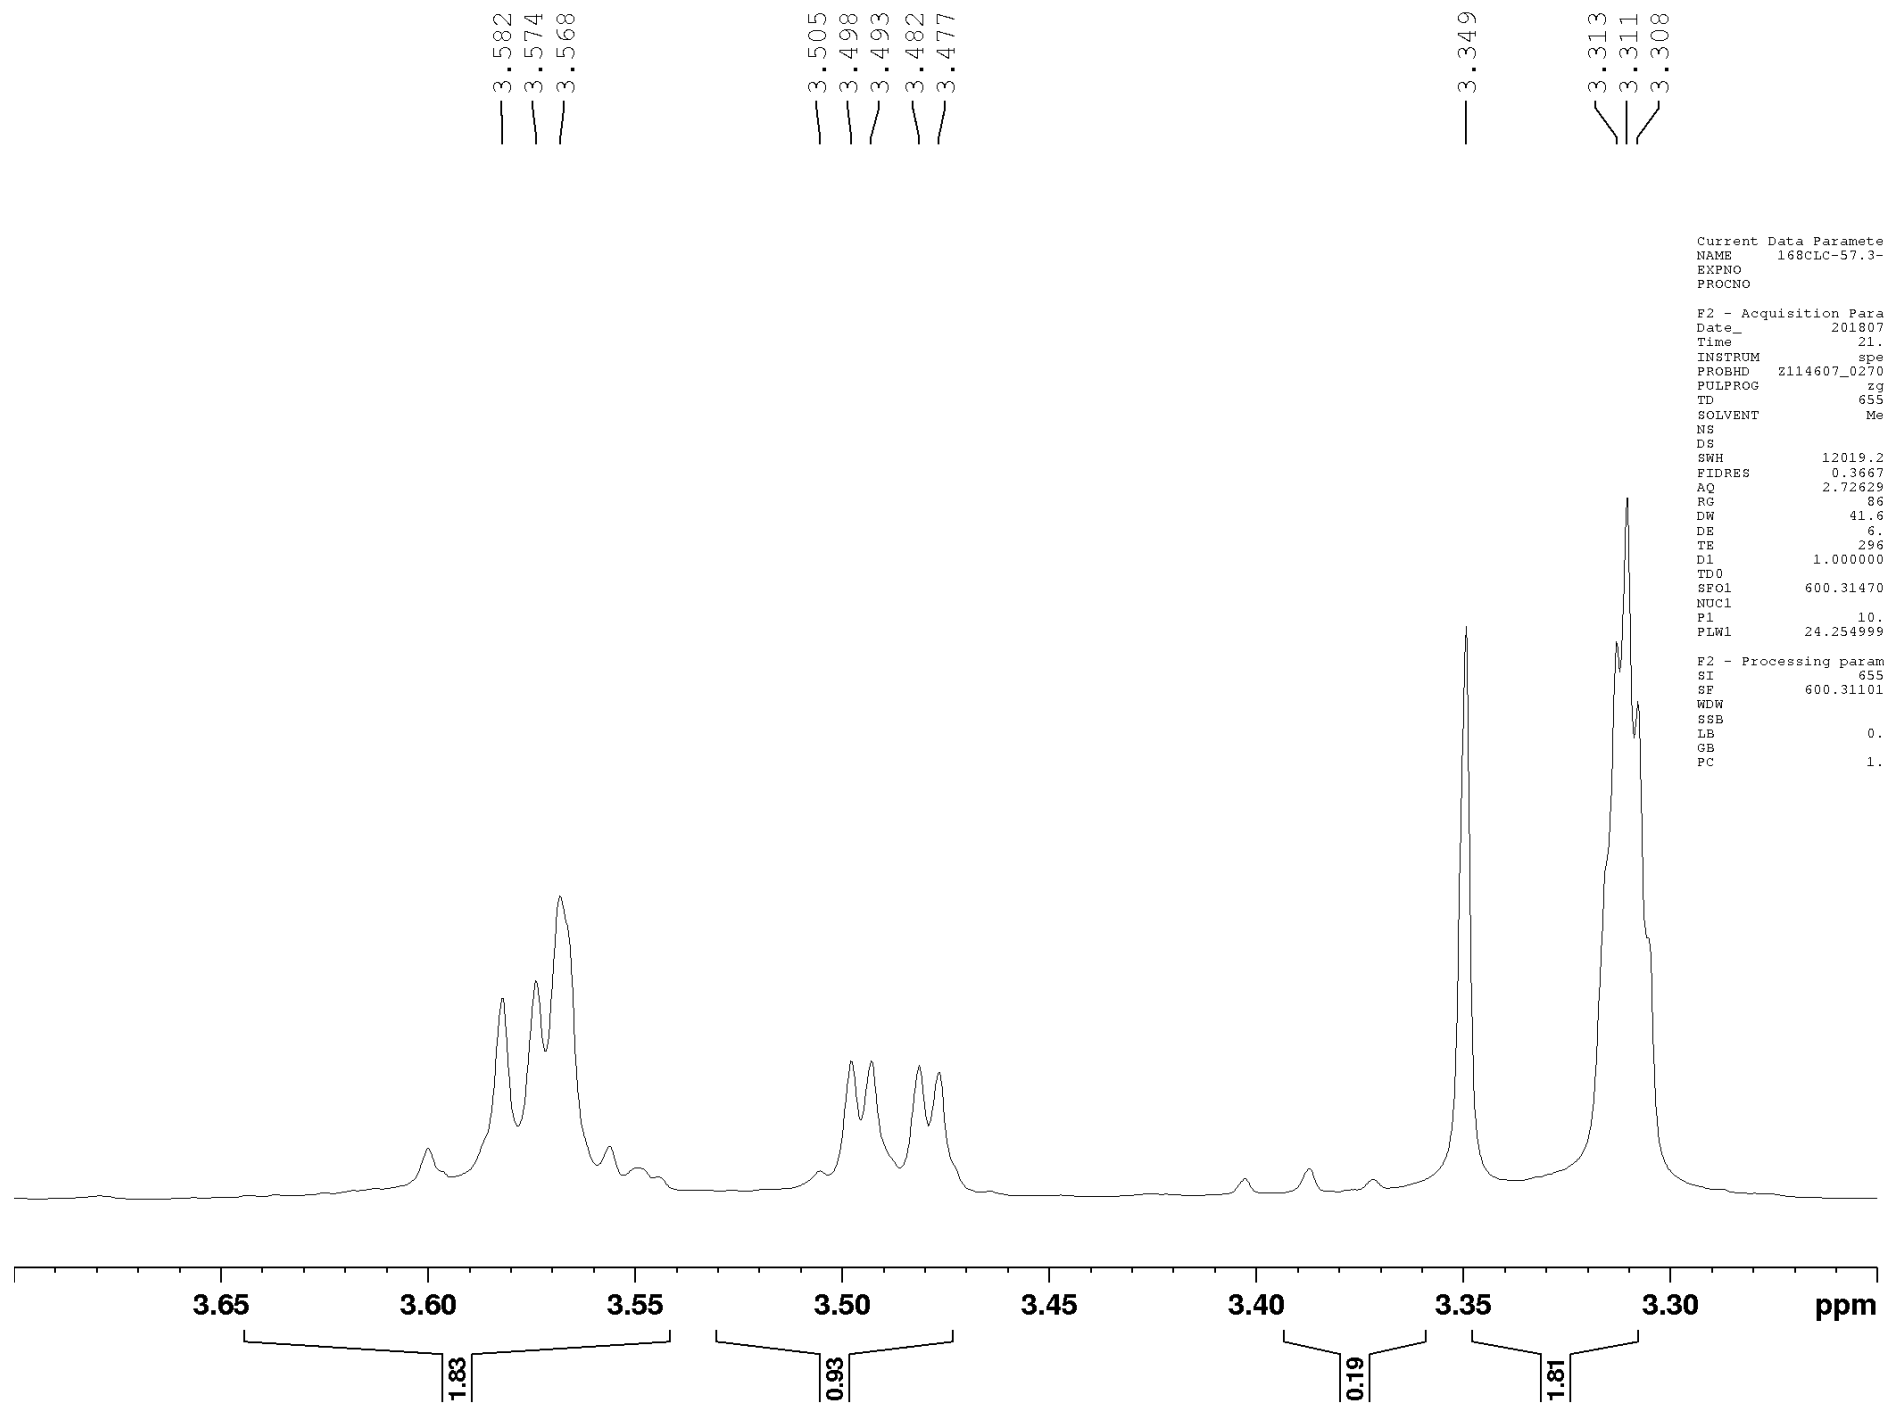

Current Data Parameters  
 NAME 168CLC-57.3-rfc90%-1-rp6-1H-CD3O  
 EXPNO 1  
 PROCNO 1

F2 - Acquisition Parameters  
 Date\_ 20180719  
 Time 21.52 h  
 INSTRUM spect  
 PROBHD Z114607\_0270 (   
 PULPROG zg30  
 TD 65536  
 SOLVENT MeOD  
 NS 64  
 DS 2  
 SWH 12019.230 Hz  
 FIDRES 0.366798 Hz  
 AQ 2.7262976 sec  
 RG 86.2  
 DW 41.600 usec  
 DE 6.50 usec  
 TE 296.7 K  
 D1 1.00000000 sec  
 TD0 1  
 SFO1 600.3147069 MHz  
 NUC1 1H  
 P1 10.00 usec  
 PLW1 24.25499916 W

F2 - Processing parameters  
 SI 65536  
 SF 600.3110112 MHz  
 WDW EM  
 SSB 0  
 LB 0.30 Hz  
 GB 0  
 PC 1.00

5.712  
5.701  
5.689  
5.676  
5.665  
5.653

5.448  
5.435  
5.419  
5.411  
5.396  
5.385

5.071  
5.063  
5.054  
5.052  
5.046  
5.035  
5.027

Current Data Parameters  
NAME 168CLC-57.3-rfc90%-1-rp6-1H-CD3O  
EXPNO 1  
PROCNO 1

F2 - Acquisition Parameters  
Date\_ 20180719  
Time 21.52 h  
INSTRUM spect  
PROBHD Z114607\_0270 (  
PULPROG zg30  
TD 65536  
SOLVENT MeOD  
NS 64  
DS 2  
SWH 12019.230 Hz  
FIDRES 0.366798 Hz  
AQ 2.7262976 sec  
RG 86.2  
DW 41.600 usec  
DE 6.50 usec  
TE 296.7 K  
D1 1.00000000 sec  
TD0 1  
SF01 600.3147069 MHz  
NUC1 1H  
P1 10.00 usec  
PLW1 24.25499916 W

F2 - Processing parameters  
SI 65536  
SF 600.3110112 MHz  
WDW EM  
SSB 0  
LB 0.30 Hz  
GB 0  
PC 1.00

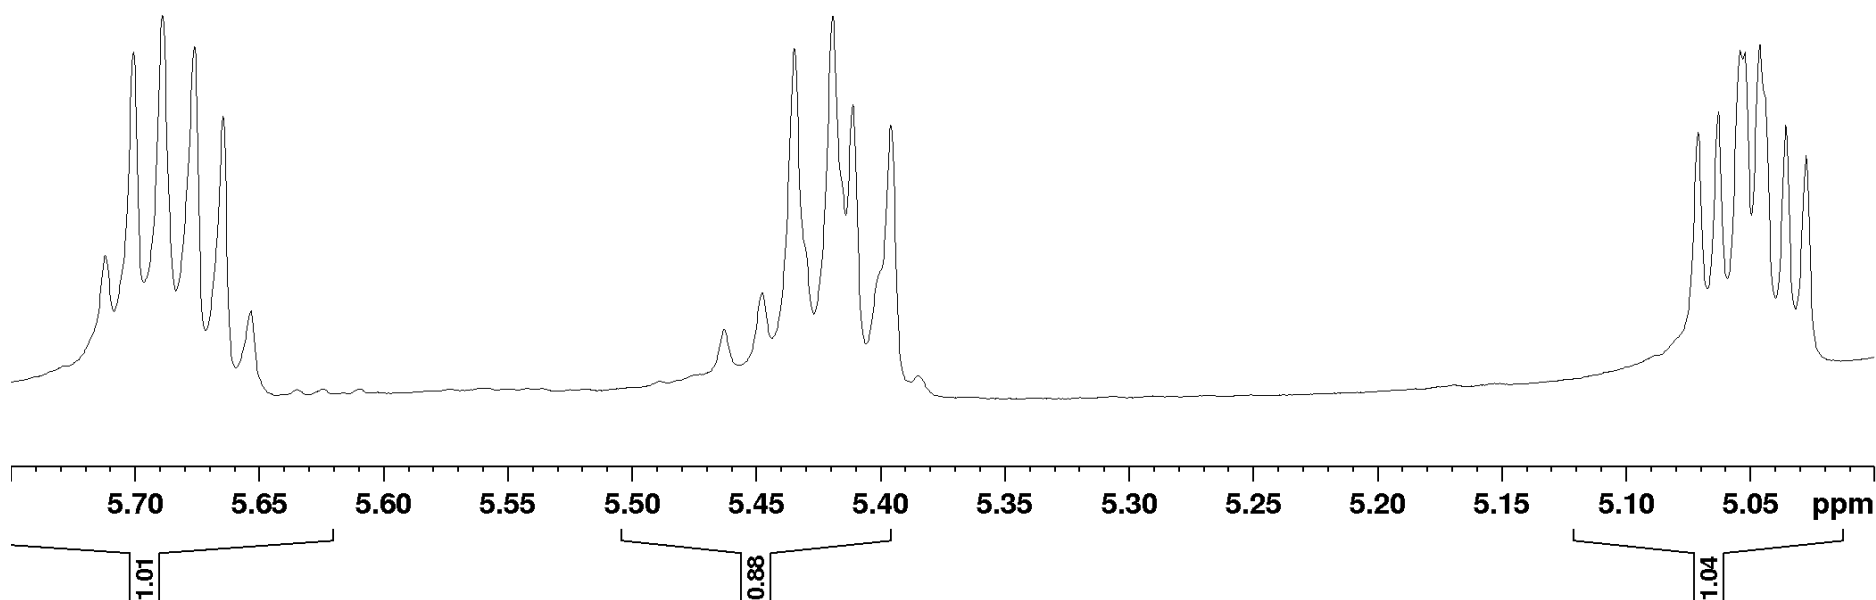

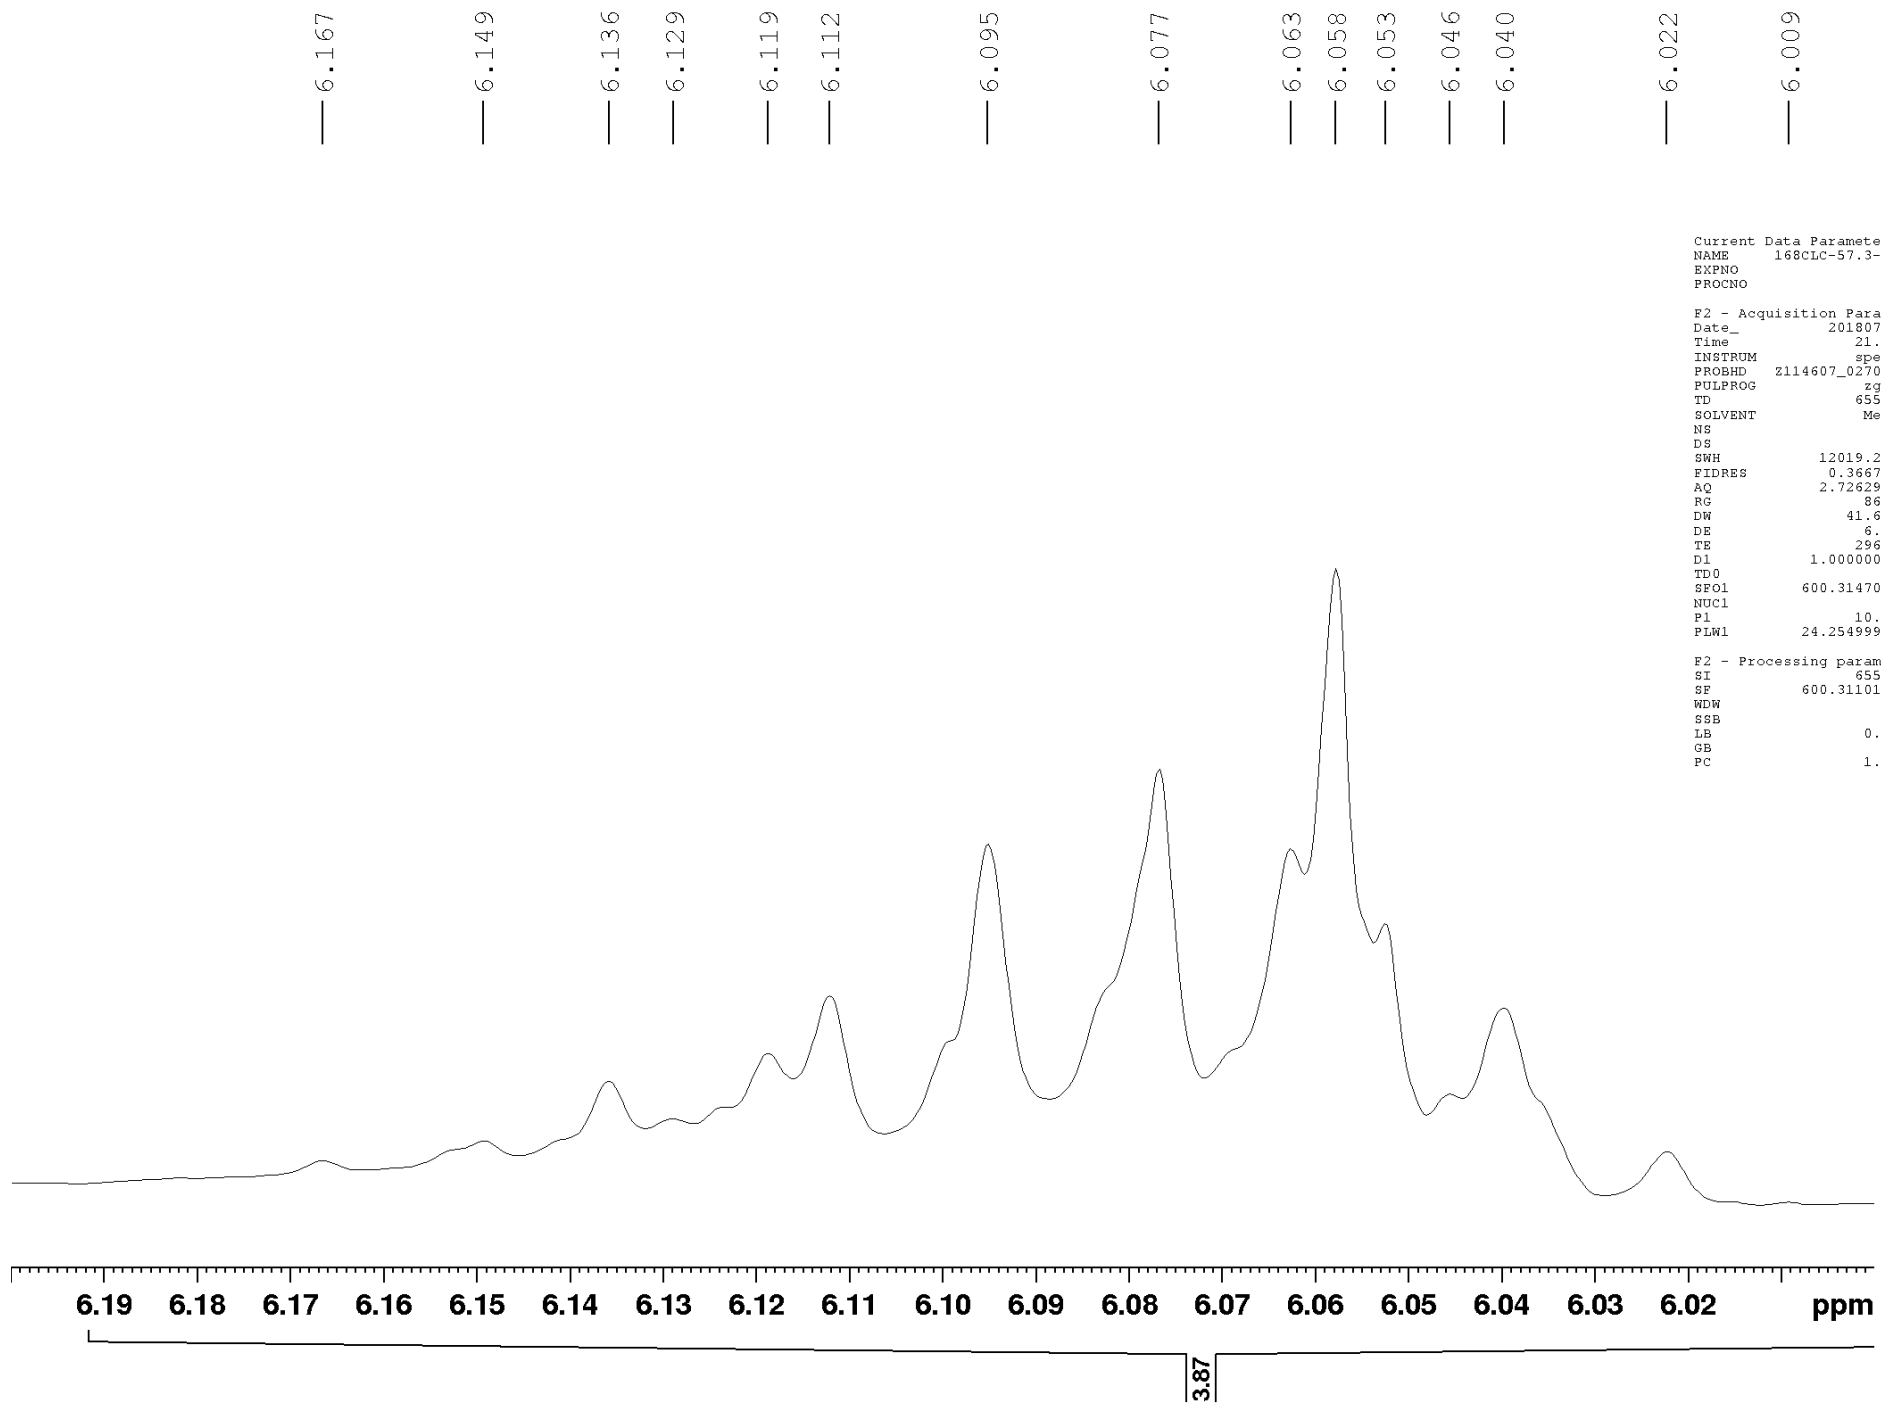

Current Data Parameters  
NAME 168CLC-57.3-rfc90%-1-rp6-1H-CD3O  
EXPNO 1  
PROCNO 1

F2 - Acquisition Parameters  
Date\_ 20180719  
Time 21.52 h  
INSTRUM spect  
PROBHD Z114607\_0270 (   
PULPROG zg30  
TD 65536  
SOLVENT MeOD  
NS 64  
DS 2  
SWH 12019.230 Hz  
FIDRES 0.366798 Hz  
AQ 2.7262976 sec  
RG 86.2  
DW 41.600 usec  
DE 6.50 usec  
TE 296.7 K  
D1 1.00000000 sec  
TD0 1  
SFO1 600.3147069 MHz  
NUC1 1H  
P1 10.00 usec  
PLW1 24.25499916 W

F2 - Processing parameters  
SI 65536  
SF 600.3110112 MHz  
WDW EM  
SSB 0  
LB 0.30 Hz  
GB 0  
PC 1.00

Figure S37.  $^{13}\text{C}$  NMR spectrum of 1-O-acetyldendrochol B (9)

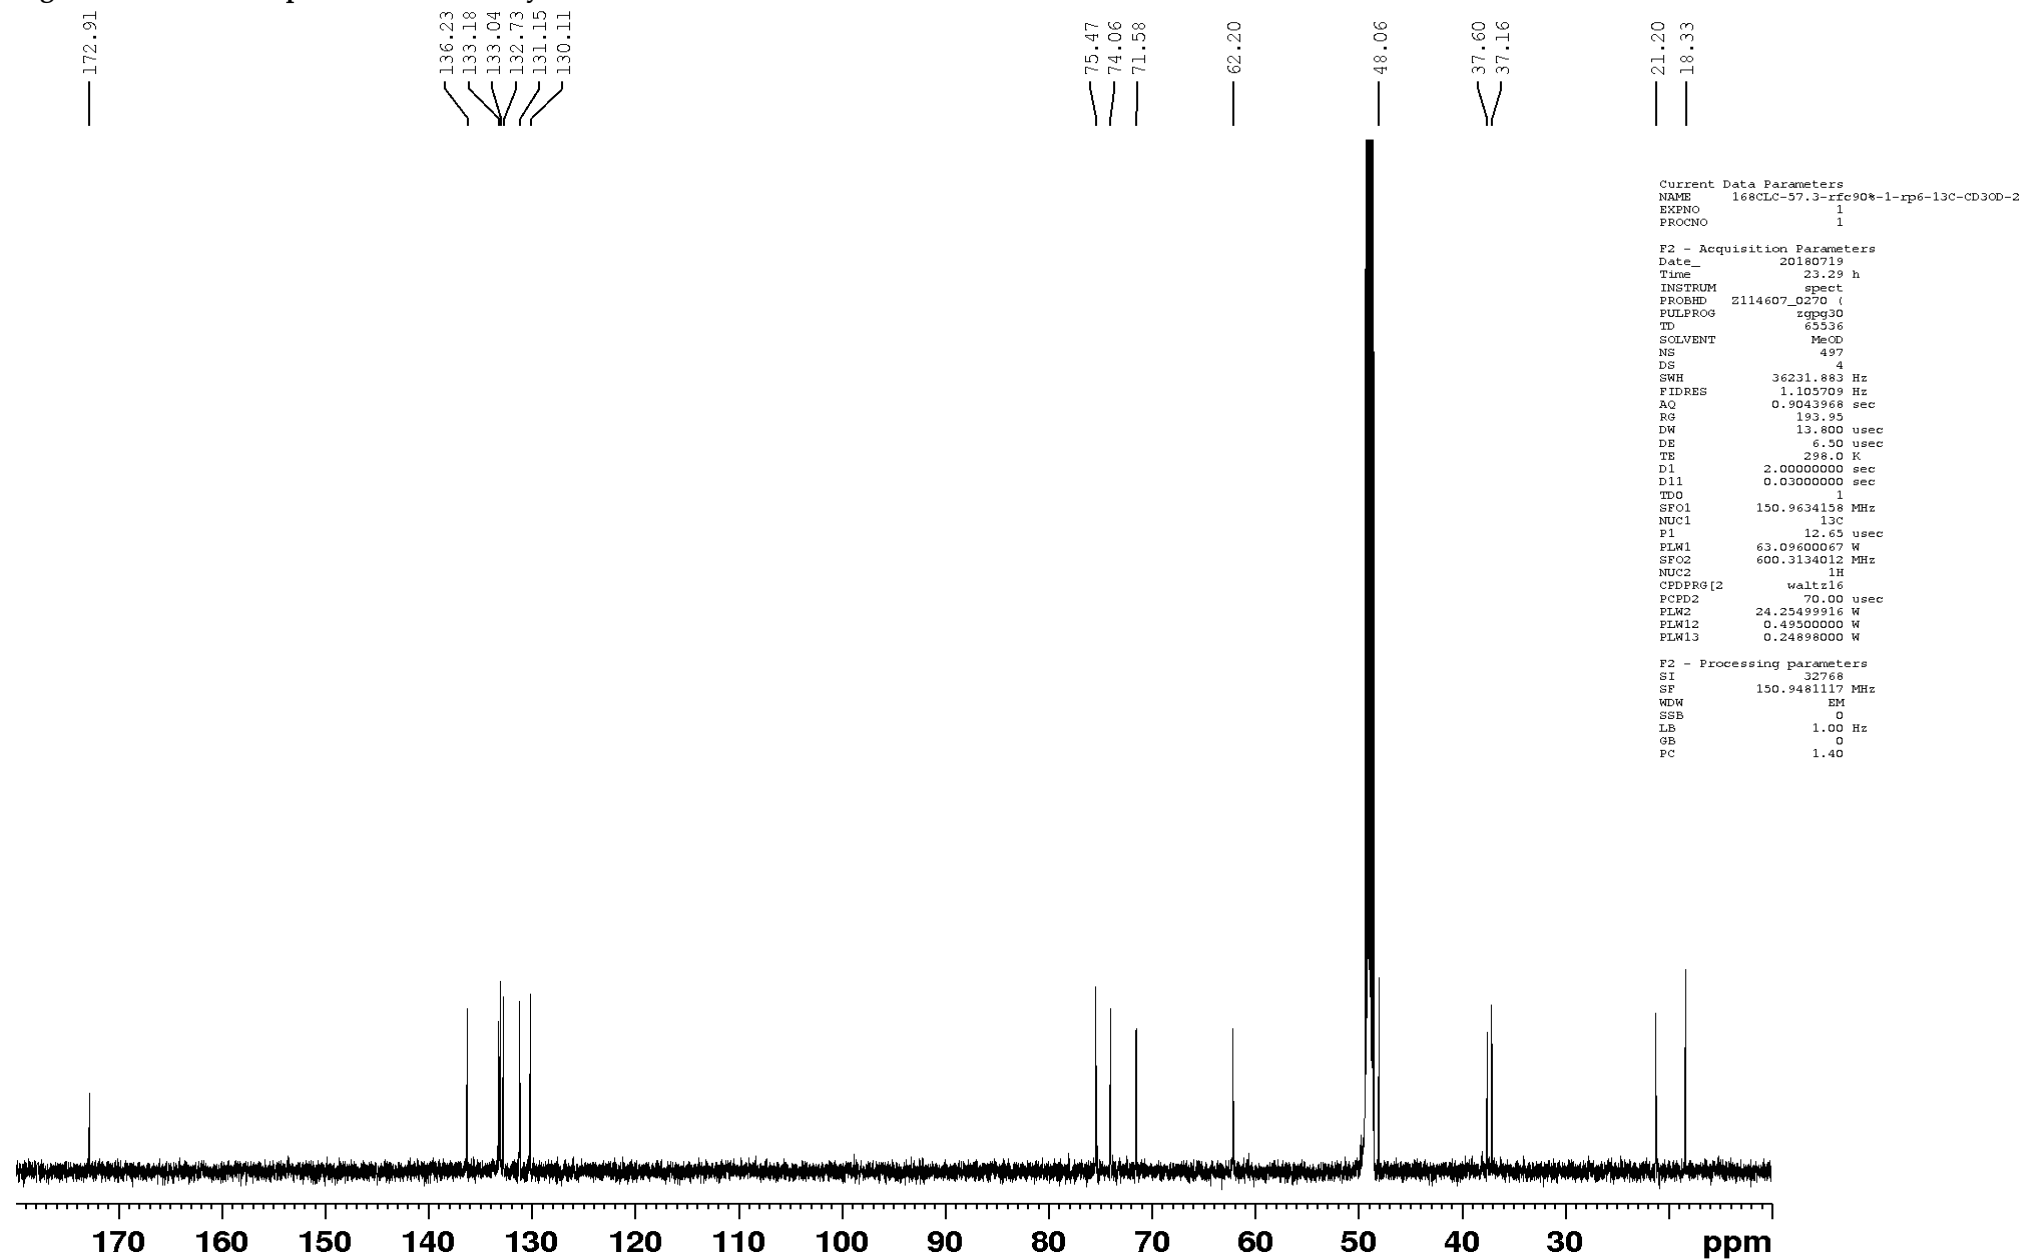

Figure S38. <sup>1</sup>H-<sup>1</sup> spectrum of 1-O-acetyldendrodochol B (9)

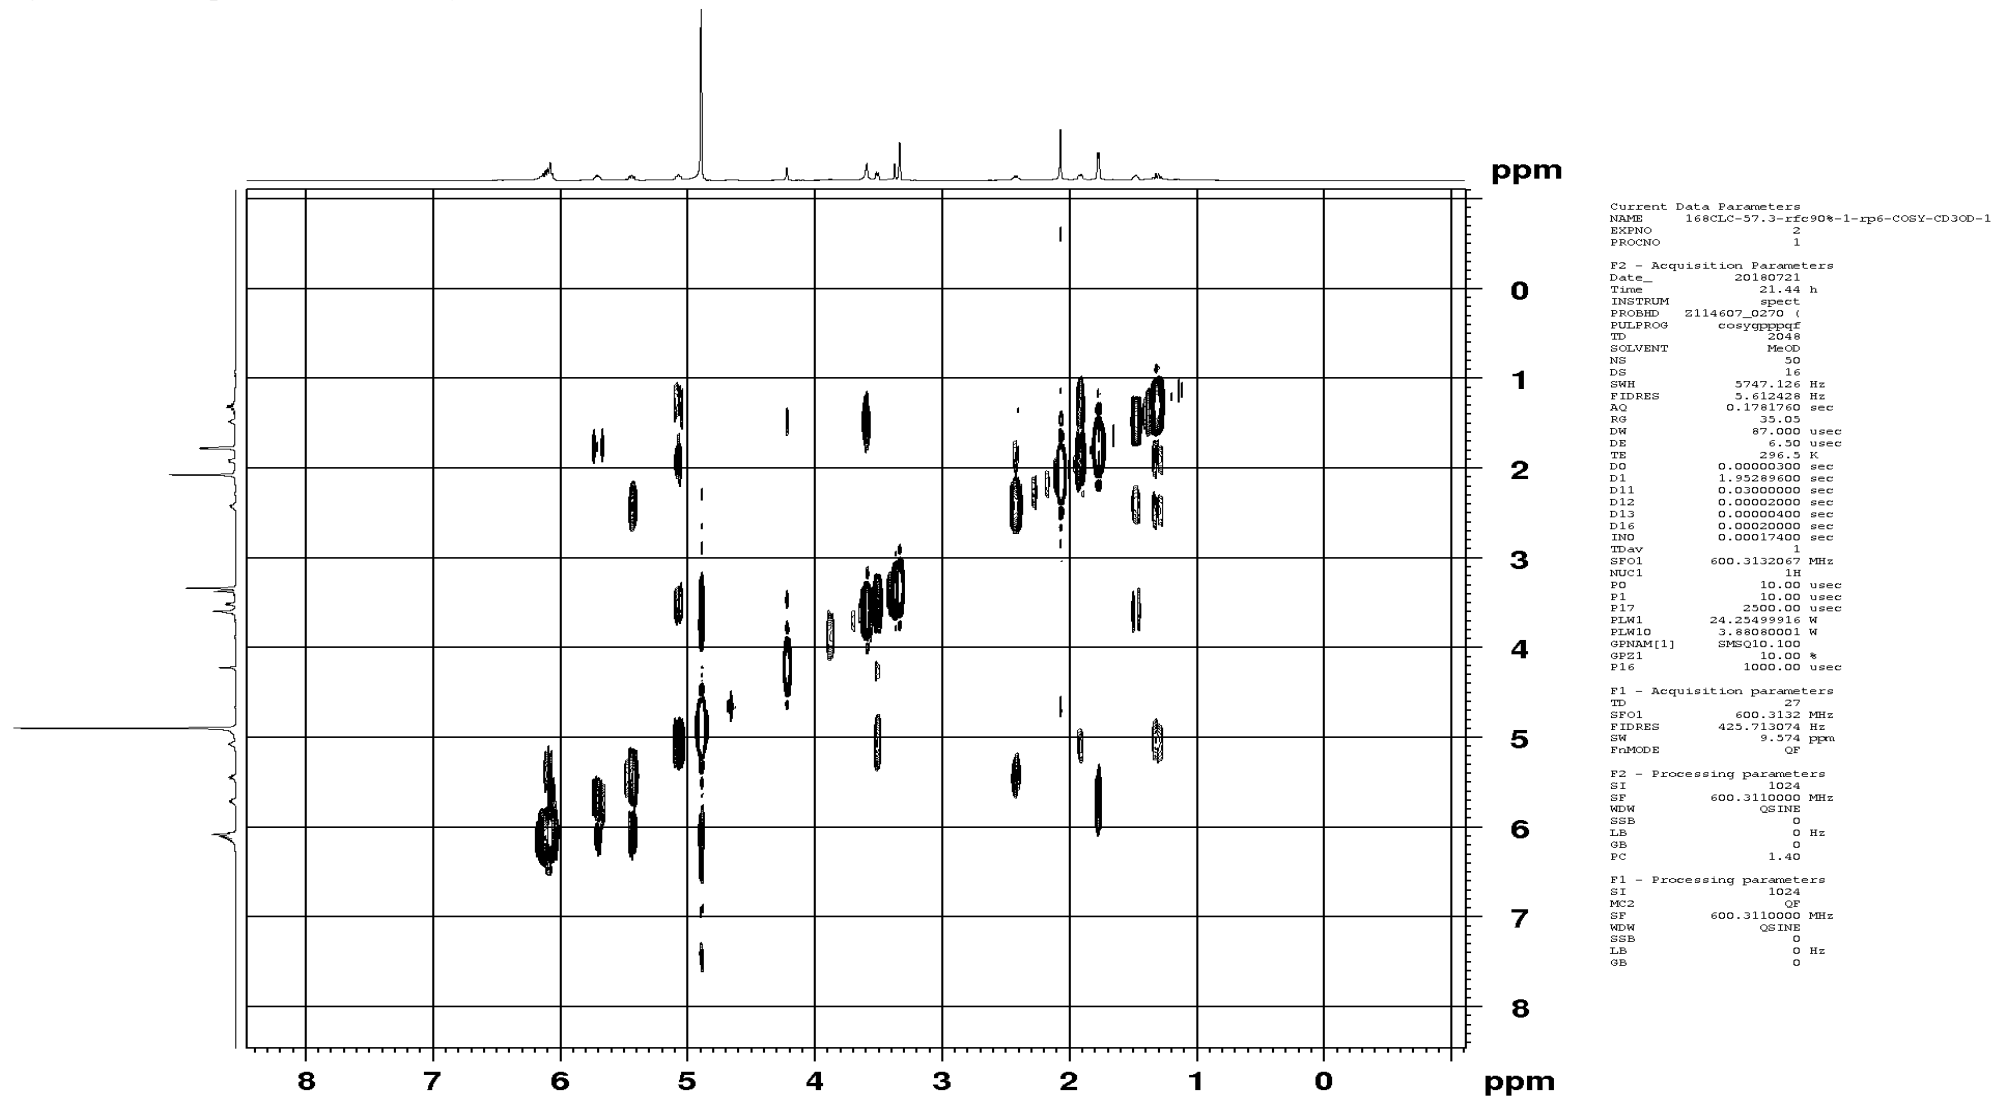

Figure S39. HMBC spectrum of 1-O-acetyldendrodochol B (9)

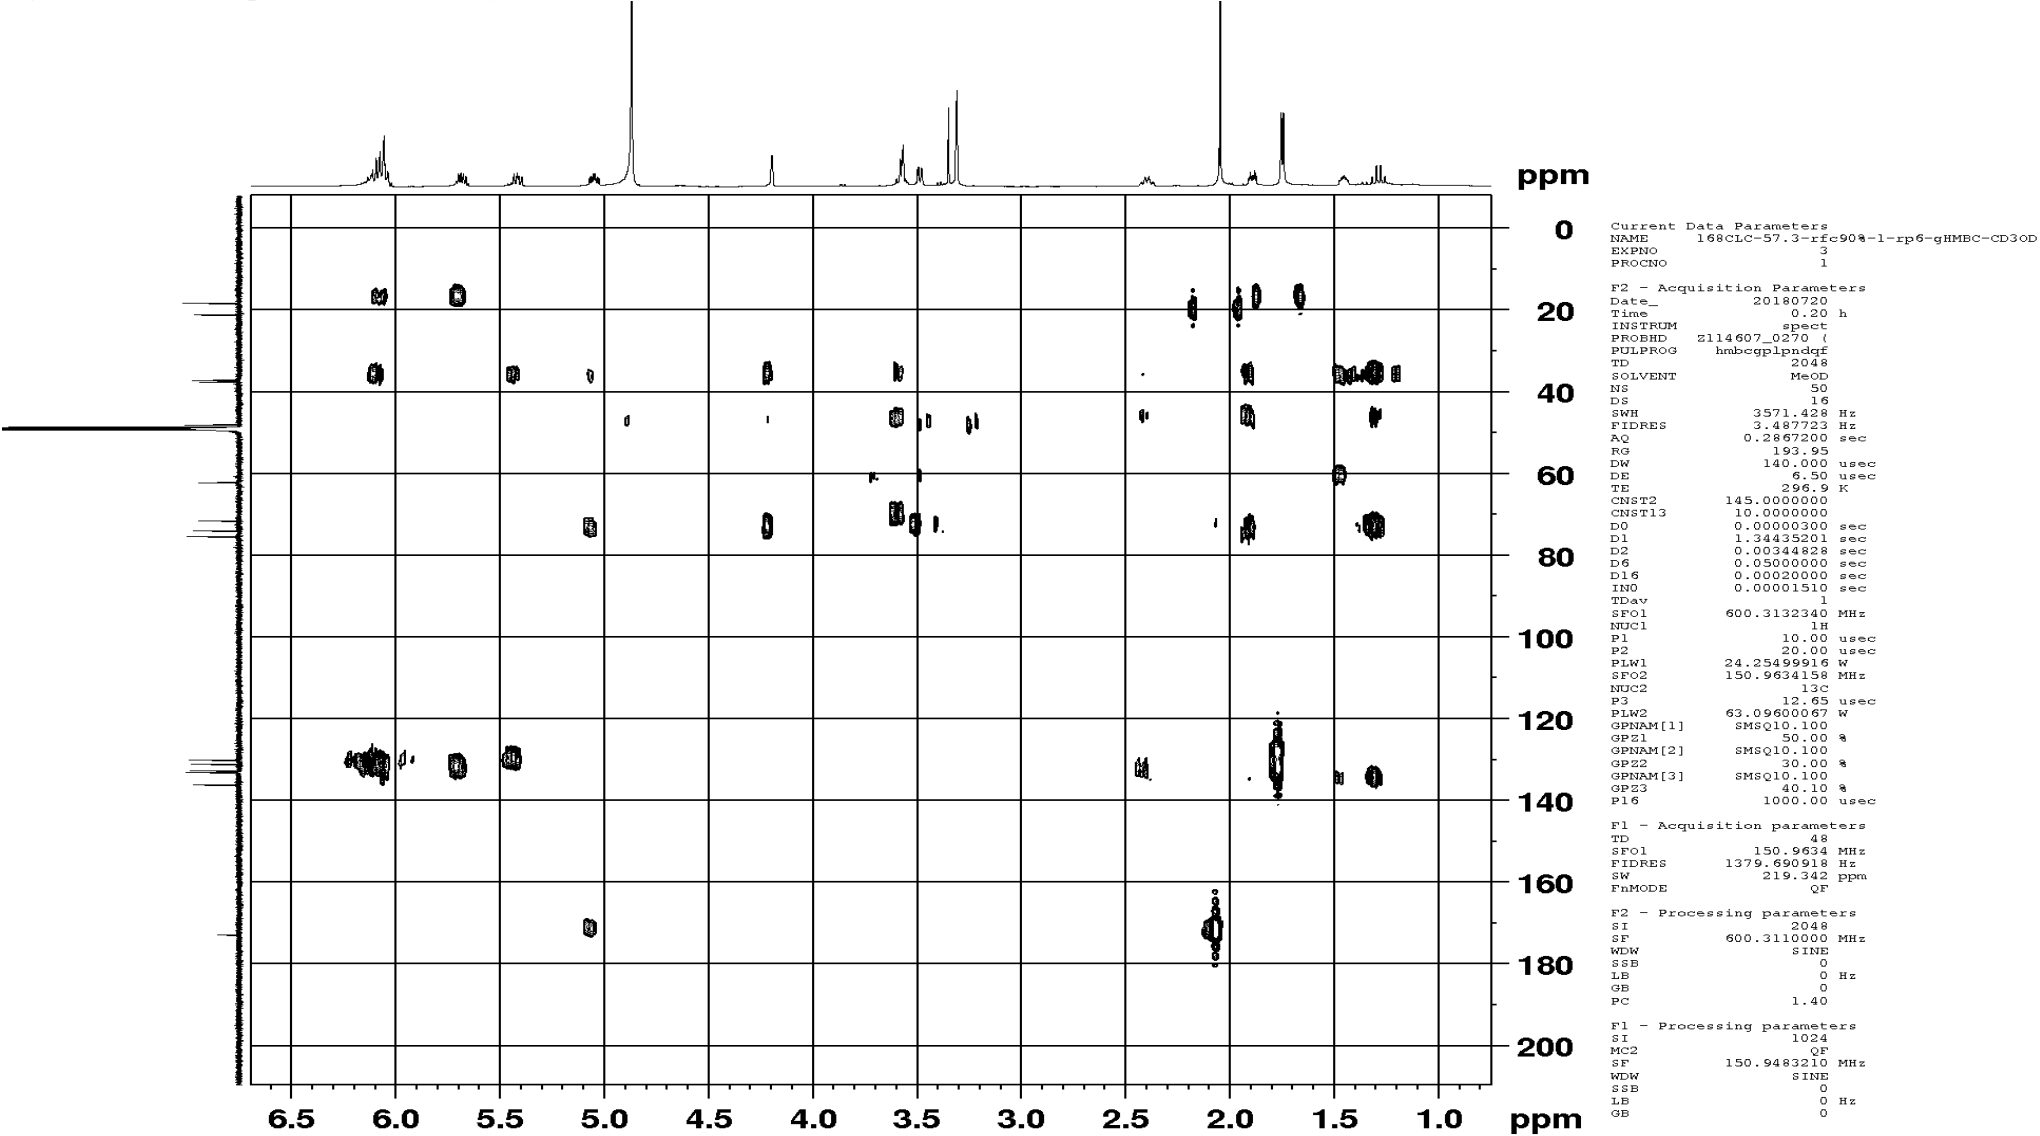



Figure S40. HSQC spectrum of 1-O-acetyldendrodochol B (9)

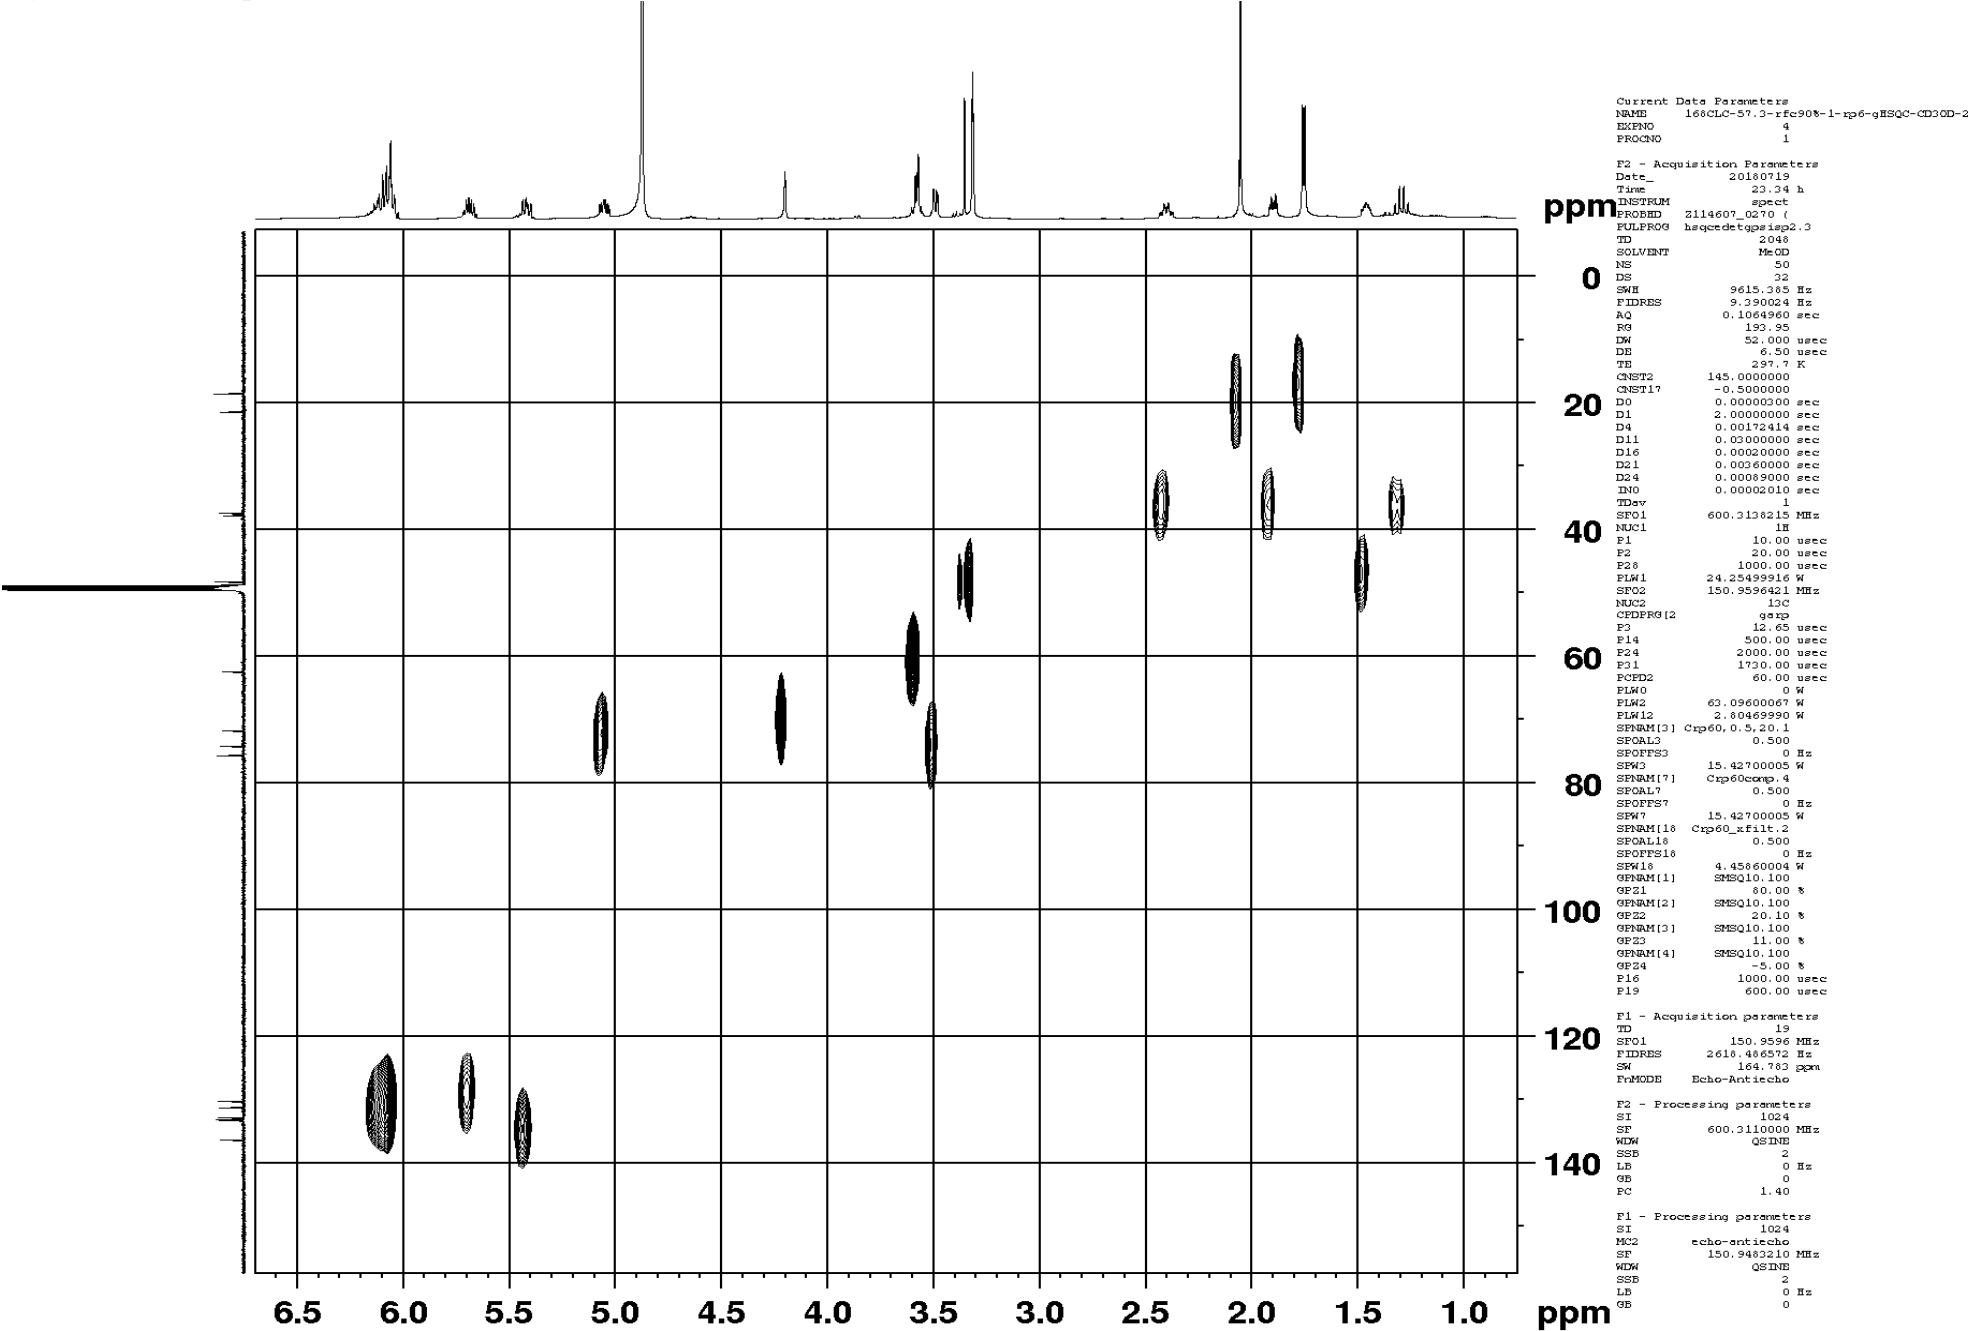

Figure S41. CD spectrum of 1-O-acetyldendrochol B (9)

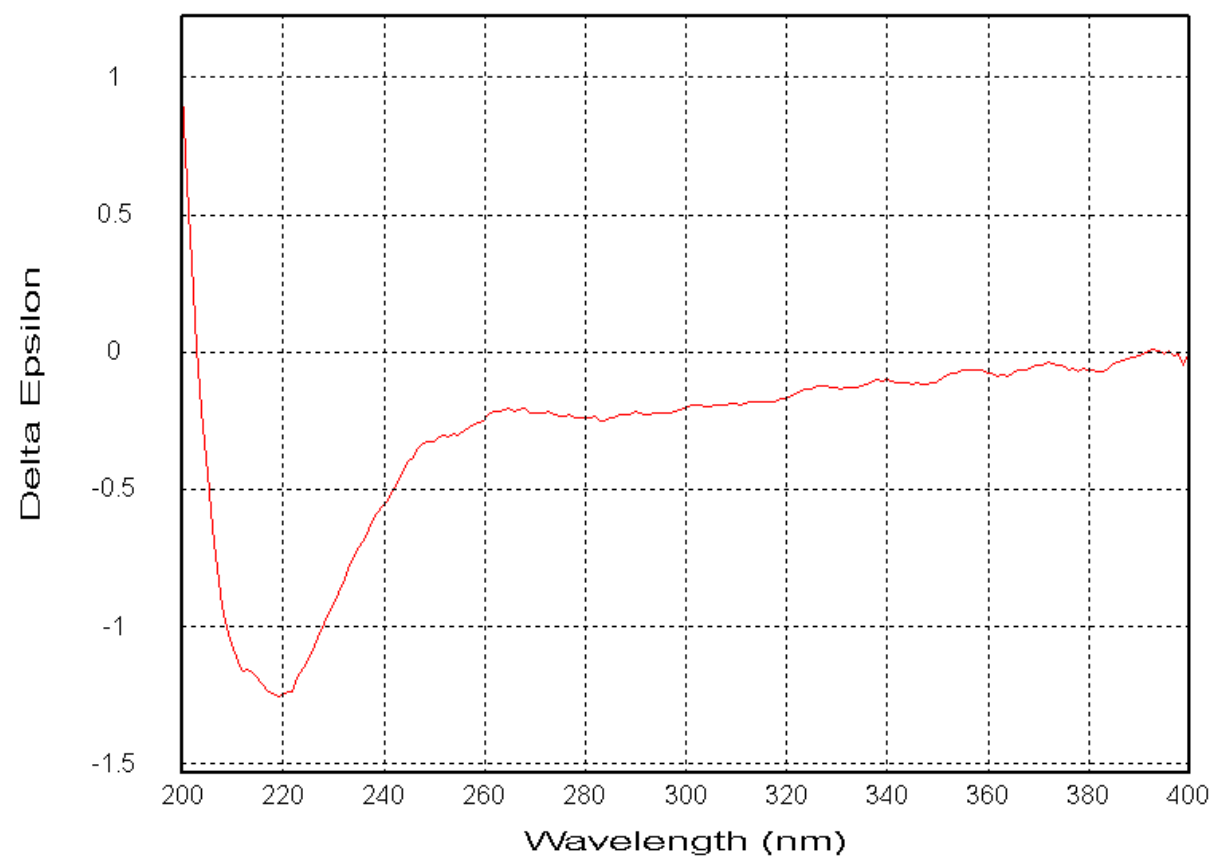

Figure S42. <sup>1</sup>H NMR spectrum of 2-O-acetyldendrochol B (10)

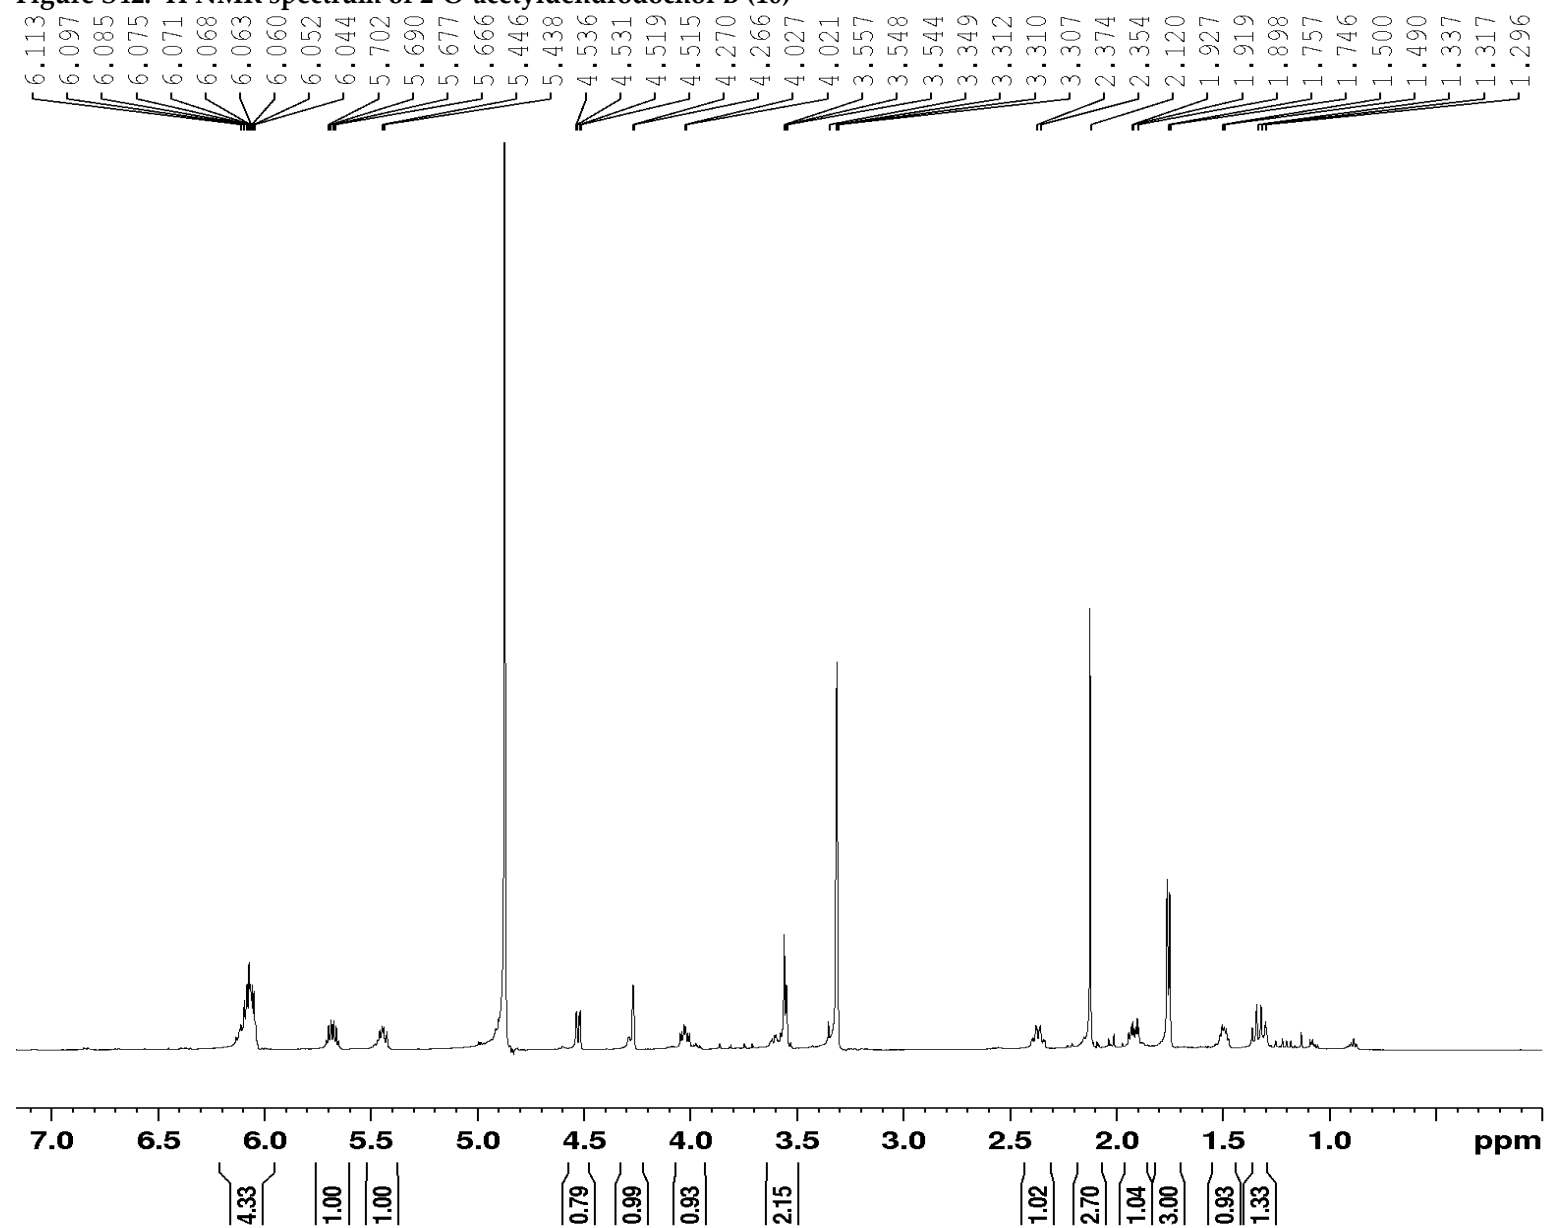

Current Data Parameters  
NAME 168CLC-57.3-rfc80%-rp10-1H-CD3OD-2.9 mg  
EXPNO 1  
PROCNO 1

F2 - Acquisition Parameters  
Date\_ 20180717  
Time 11.43 h  
INSTRUM spect  
PROBHD 2114607\_0270 (zq30)  
PULPROG zg30  
TD 65536  
SOLVENT MeOD  
NS 64  
DS 2  
SWH 12019.230 Hz  
FIDRES 0.366798 Hz  
AQ 2.7262976 sec  
RG 109.62  
DW 41.600 usec  
DE 6.50 usec  
TE 296.5 K  
D1 1.00000000 sec  
TD0 1  
SFO1 600.3147069 MHz  
NUC1 1H  
P1 10.00 usec  
PLW1 24.25499916 W

F2 - Processing parameters  
SI 65536  
SF 600.3110118 MHz  
WDW EM  
SSB 0  
LB 0.30 Hz  
GB 0  
PC 1.00

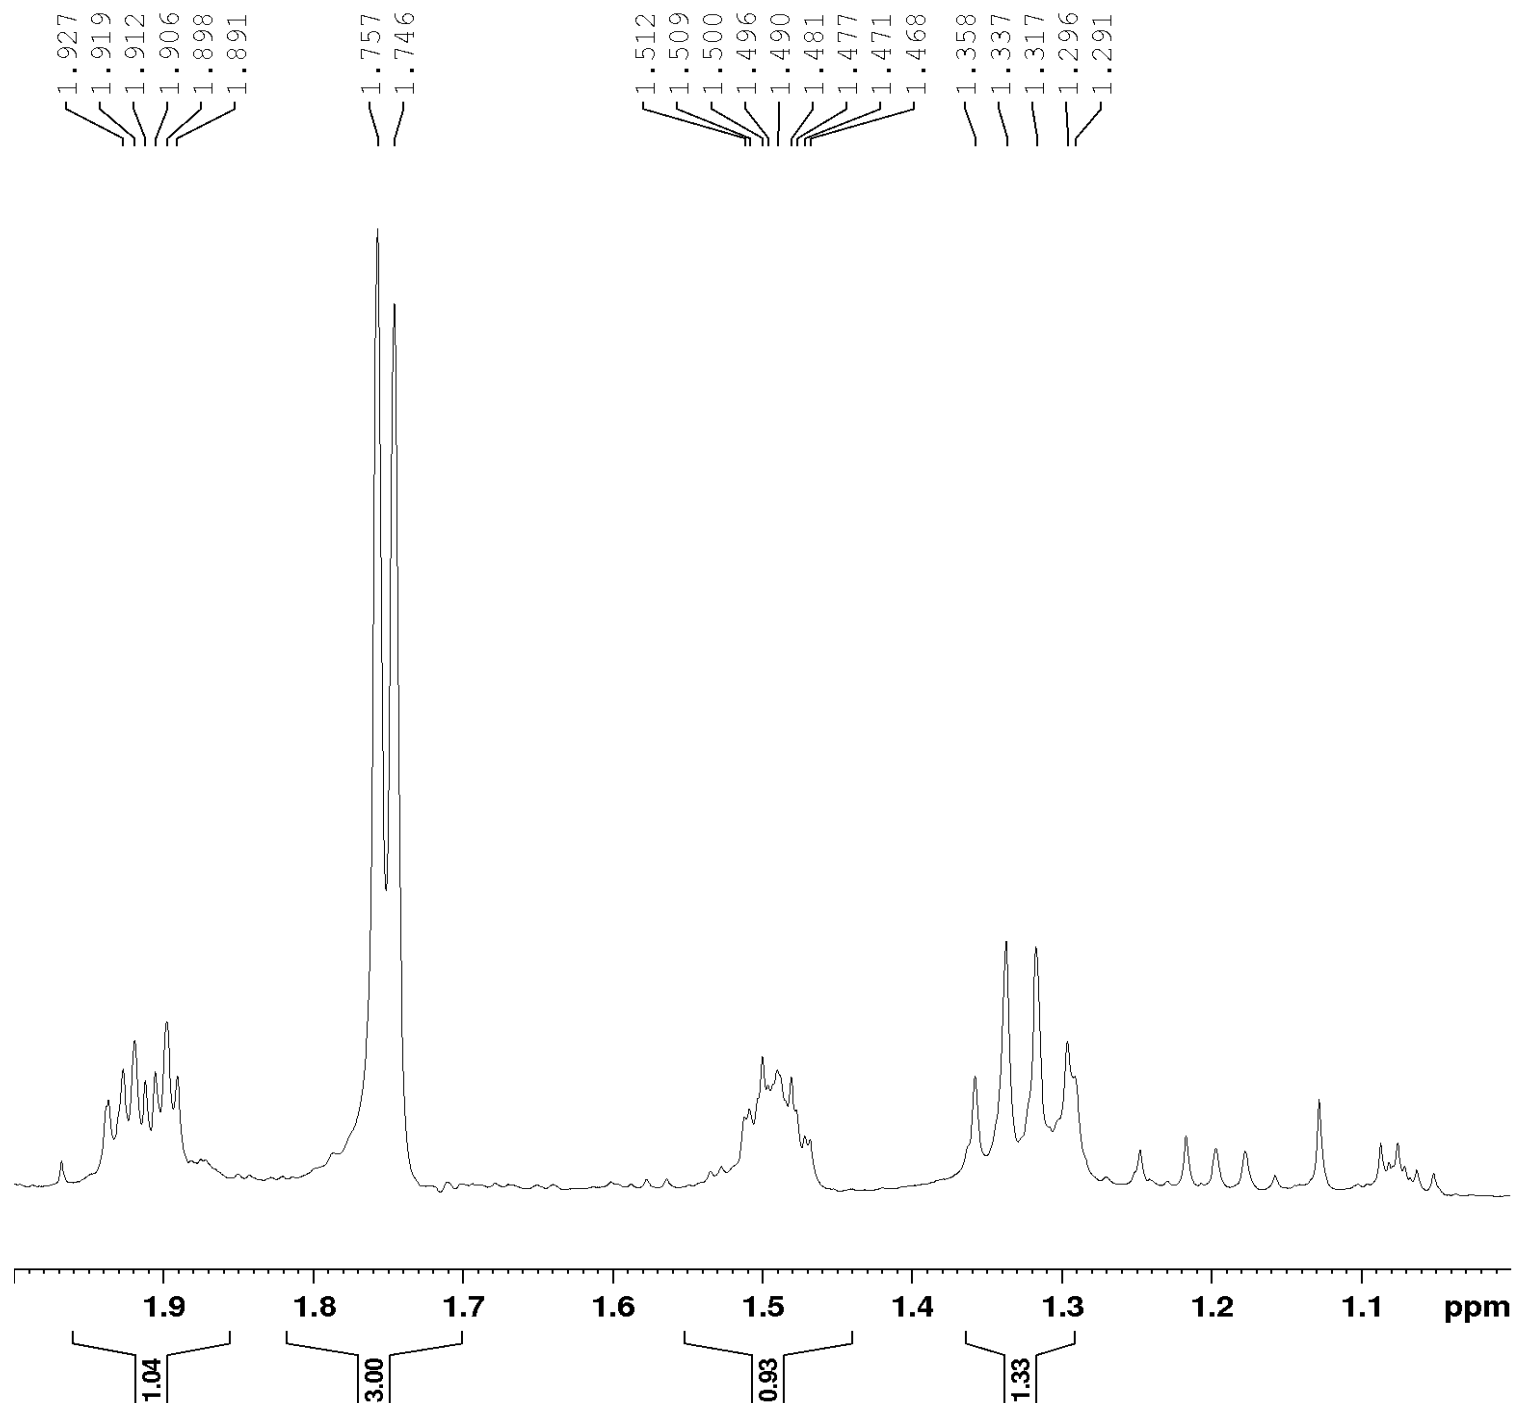

Current Data Parameters  
 NAME 168CLC-57.3-rfc80%-rp10-1H-CD3OD-2.9 mg  
 EXPNO 1  
 PROCNO 1

F2 - Acquisition Parameters  
 Date\_ 20180717  
 Time 11.43 h  
 INSTRUM spect  
 PROBHD Z114607\_0270 (   
 PULPROG zg30  
 TD 65536  
 SOLVENT MeOD  
 NS 64  
 DS 2  
 SWH 12019.230 Hz  
 FIDRES 0.366798 Hz  
 AQ 2.7262976 sec  
 RG 109.62  
 DW 41.600 usec  
 DE 6.50 usec  
 TE 296.5 K  
 D1 1.00000000 sec  
 TD0 1  
 SFO1 600.3147069 MHz  
 NUC1 1H  
 P1 10.00 usec  
 PLW1 24.25499916 W

F2 - Processing parameters  
 SI 65536  
 SF 600.3110118 MHz  
 WDW EM  
 SSB 0  
 LB 0.30 Hz  
 GB 0  
 PC 1.00

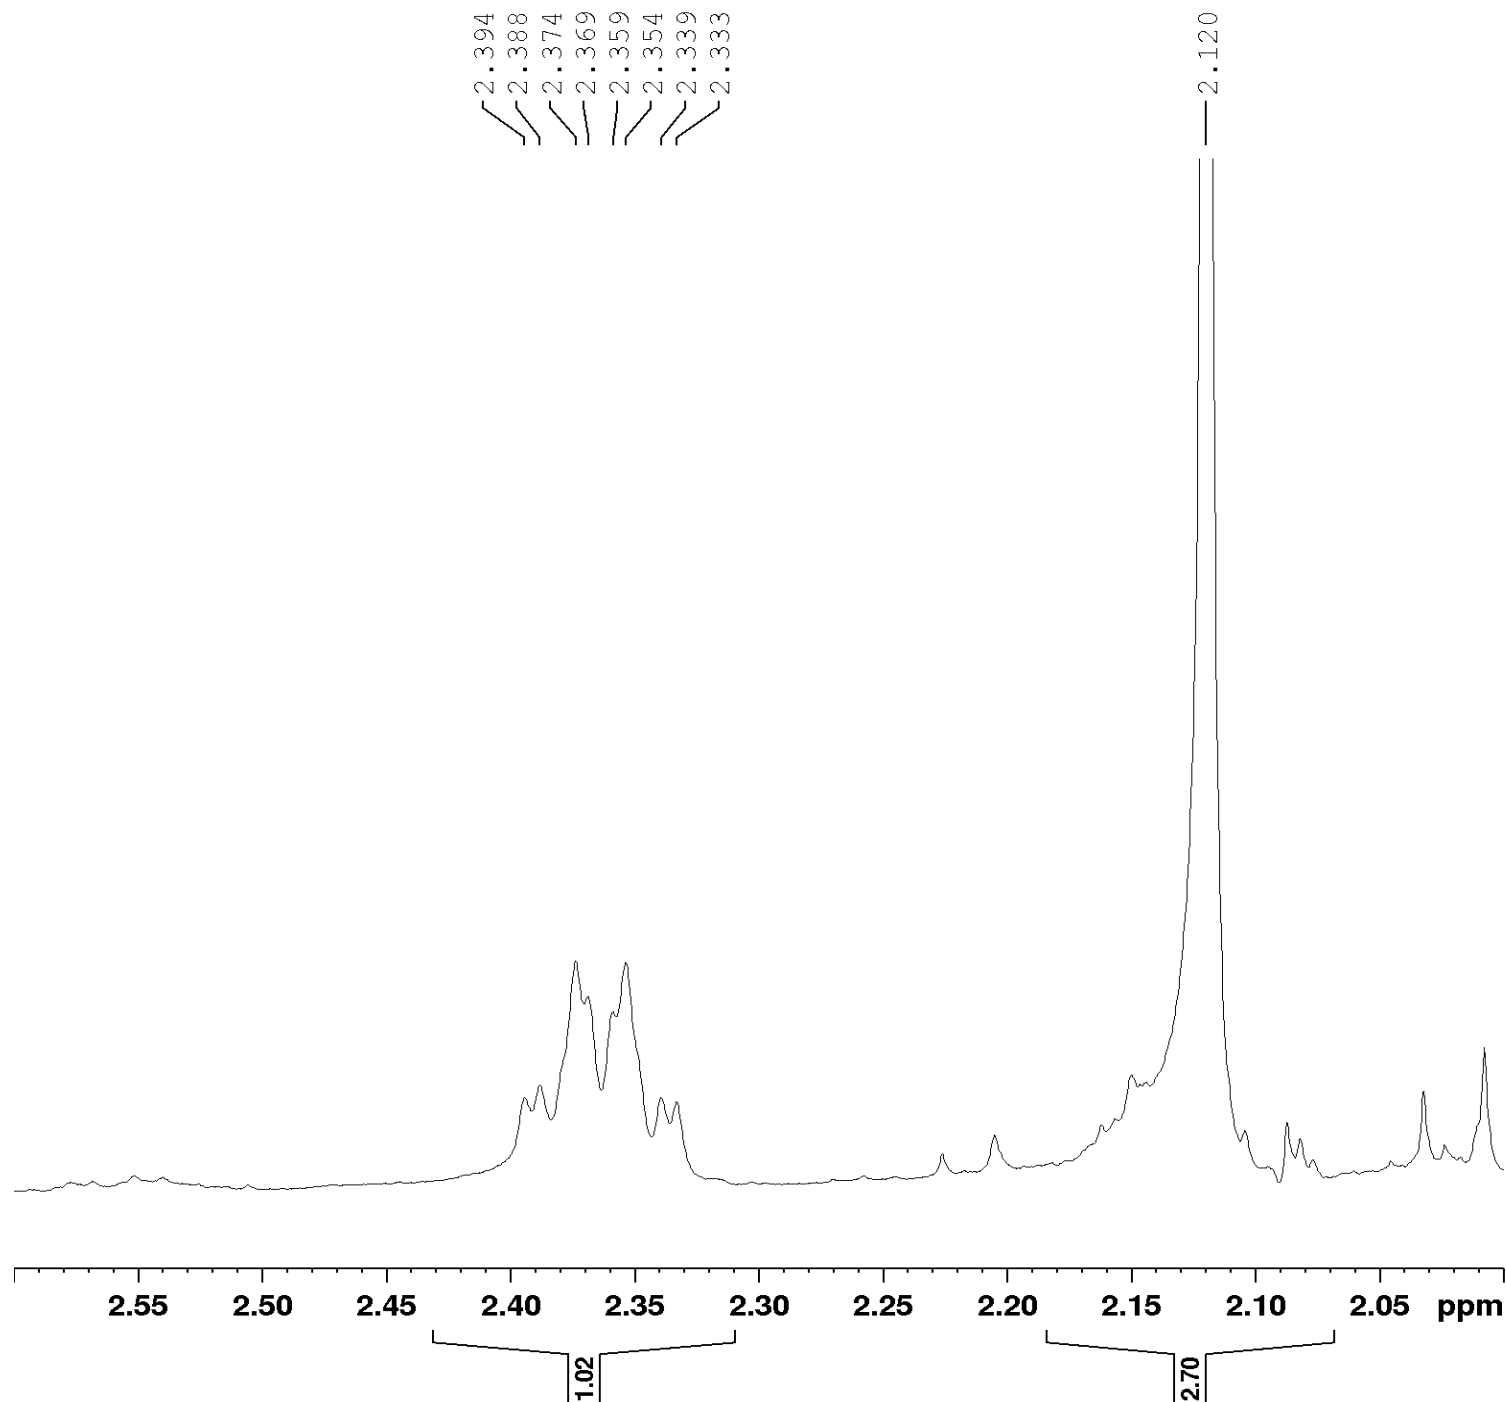

Current Data Parameters  
NAME 168CLC-57.3-rfc80%-rp10-1H-CD3OD-2.9 mg  
EXPNO 1  
PROCNO 1

F2 - Acquisition Parameters  
Date\_ 20180717  
Time 11.43 h  
INSTRUM spect  
PROBHD Z114607\_0270 (  
PULPROG zg30  
TD 65536  
SOLVENT MeOD  
NS 64  
DS 2  
SWH 12019.230 Hz  
FIDRES 0.366798 Hz  
AQ 2.7262976 sec  
RG 109.62  
DW 41.600 usec  
DE 6.50 usec  
TE 296.5 K  
D1 1.00000000 sec  
TD0 1  
SFO1 600.3147069 MHz  
NUC1 1H  
P1 10.00 usec  
PLW1 24.25499916 W

F2 - Processing parameters  
SI 65536  
SF 600.3110118 MHz  
WDW EM  
SSB 0  
LB 0.30 Hz  
GB 0  
PC 1.00

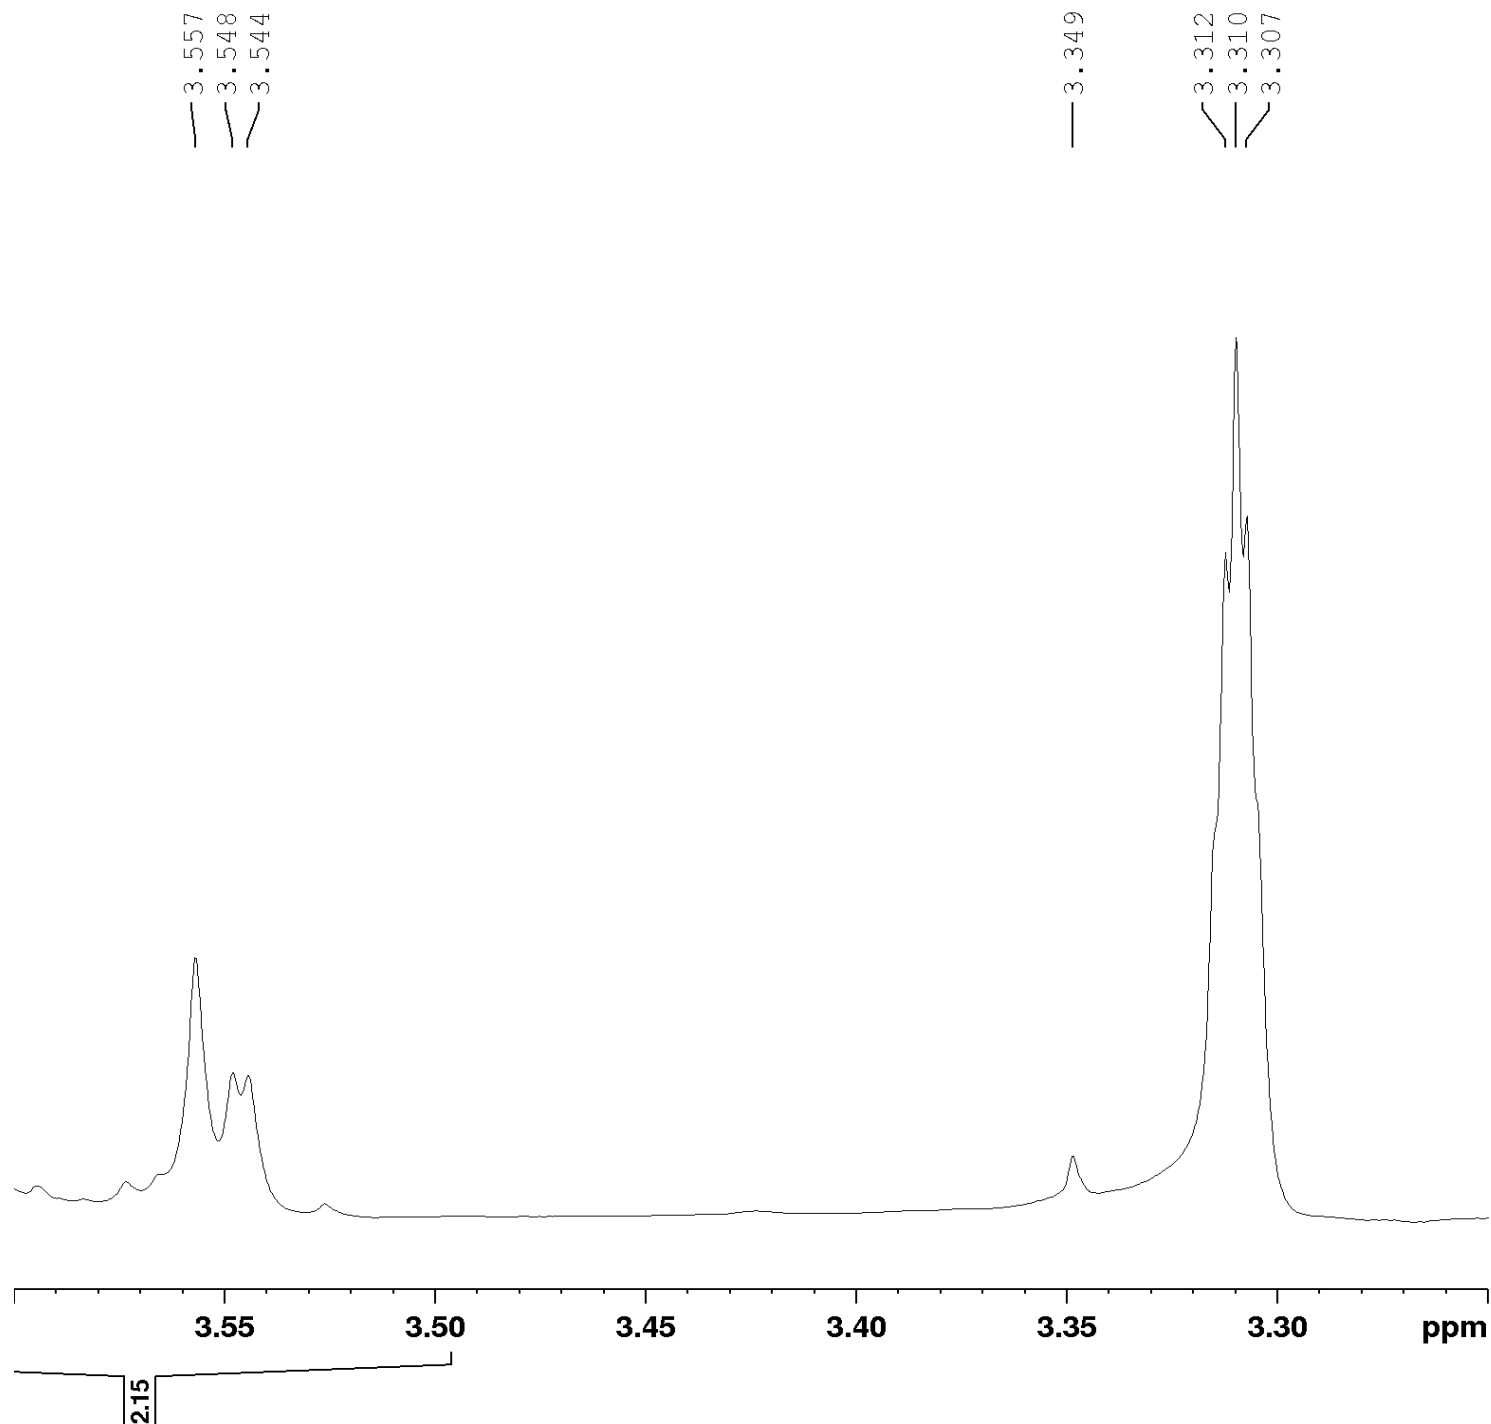

Current Data Parameters  
NAME 168CLC-57.3-rfc80&-rp10-1H-CD3OD-2.9 mg  
EXPNO 1  
PROCNO 1

F2 - Acquisition Parameters  
Date\_ 20180717  
Time 11.43 h  
INSTRUM spect  
PROBHD Z114607\_0270 (  
PULPROG zg30  
TD 65536  
SOLVENT MeOD  
NS 64  
DS 2  
SWH 12019.230 Hz  
FIDRES 0.366798 Hz  
AQ 2.7262976 sec  
RG 109.62  
DW 41.600 usec  
DE 6.50 usec  
TE 296.5 K  
D1 1.00000000 sec  
TD0 1  
SFO1 600.3147069 MHz  
NUC1 1H  
P1 10.00 usec  
PLW1 24.25499916 W

F2 - Processing parameters  
SI 65536  
SF 600.3110118 MHz  
WDW EM  
SSB 0  
LB 0.30 Hz  
GB 0  
PC 1.00

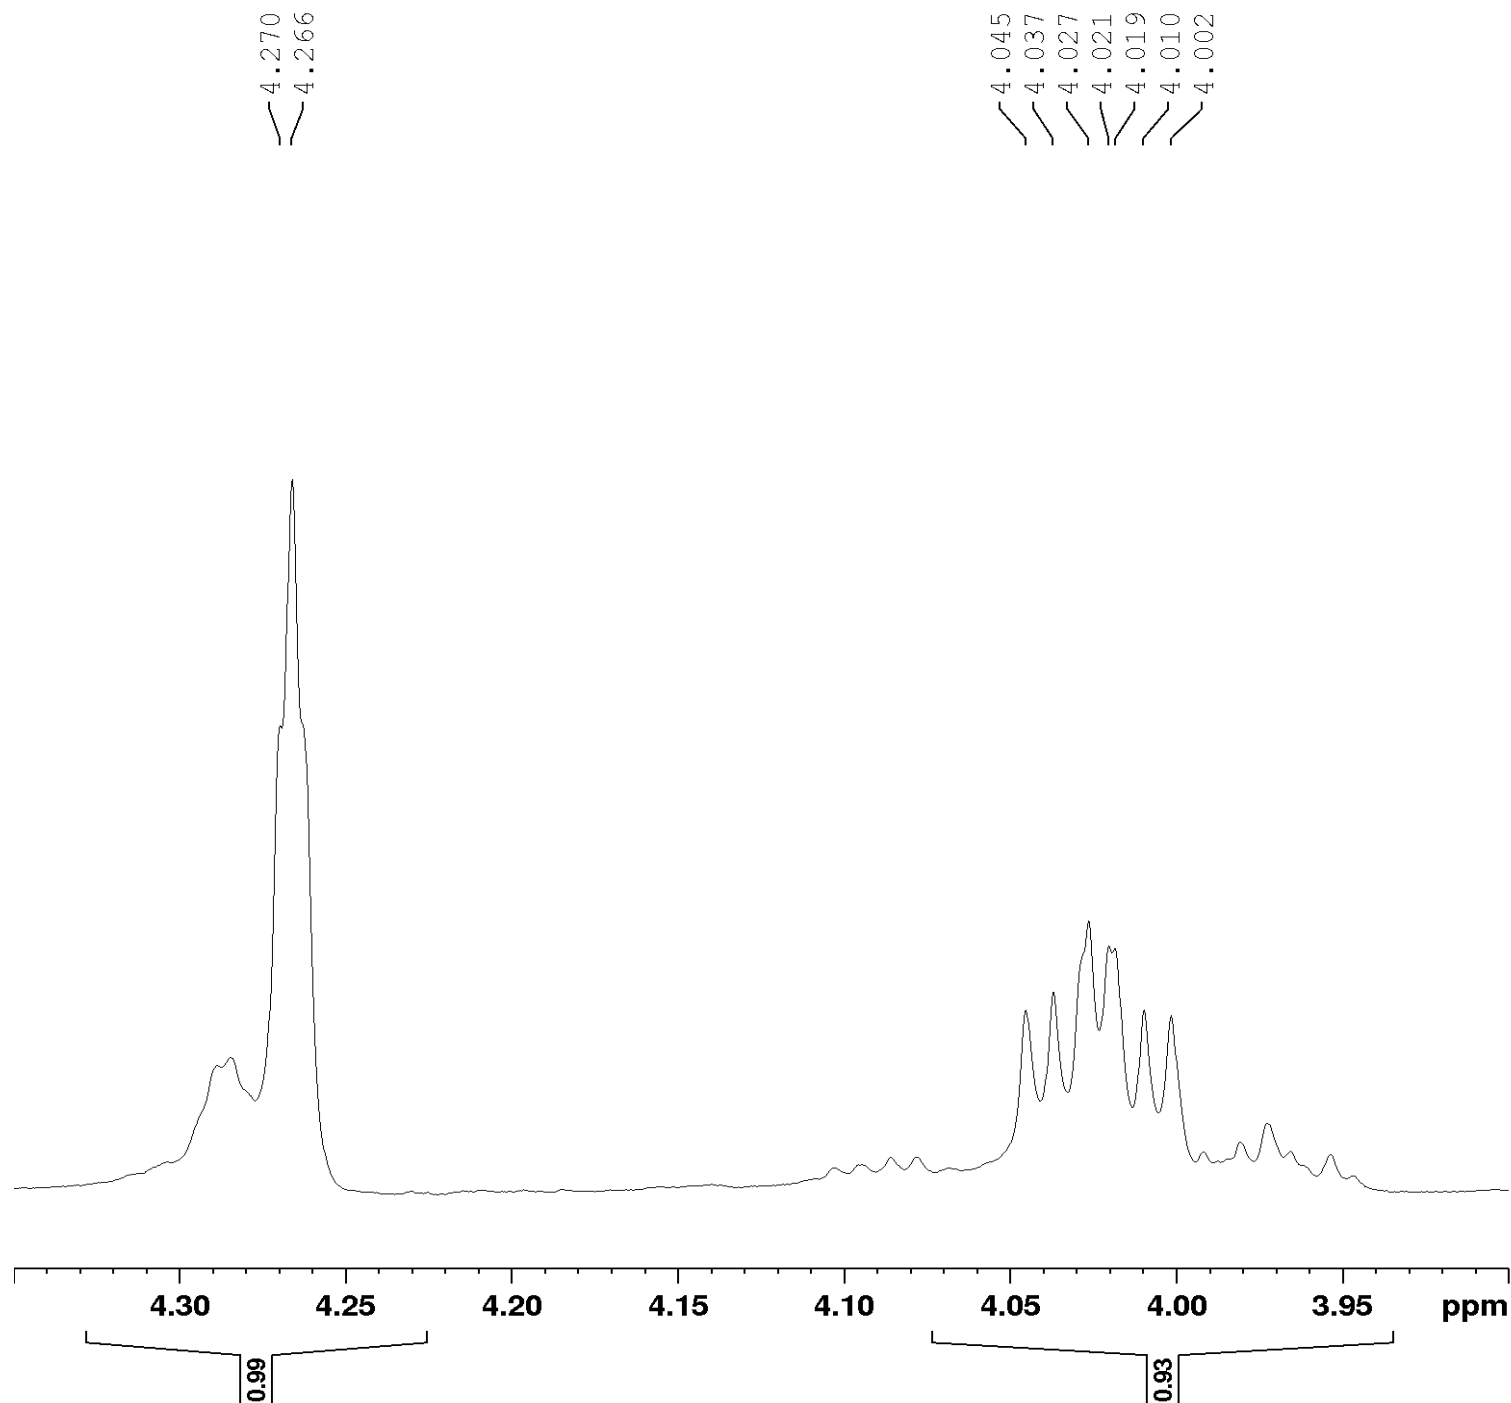

Current Data Parameters  
NAME 168CLC-57.3-rfc80%-rp10-1H-CD3OD-2.9 mg  
EXPNO 1  
PROCNO 1

F2 - Acquisition Parameters  
Date\_ 20180717  
Time 11.43 h  
INSTRUM spect  
PROBHD Z114607\_0270 (  
PULPROG zg30  
TD 65536  
SOLVENT MeOD  
NS 64  
DS 2  
SWH 12019.230 Hz  
FIDRES 0.366798 Hz  
AQ 2.7262976 sec  
RG 109.62  
DW 41.600 usec  
DE 6.50 usec  
TE 296.5 K  
D1 1.00000000 sec  
TD0 1  
SFO1 600.3147069 MHz  
NUC1 1H  
P1 10.00 usec  
PLW1 24.25499916 W

F2 - Processing parameters  
SI 65536  
SF 600.3110118 MHz  
WDW EM  
SSB 0  
LB 0.30 Hz  
GB 0  
PC 1.00

— 5.713  
— 5.702  
— 5.690  
— 5.677  
— 5.666  
— 5.655

5.487  
5.483  
5.471  
5.461  
5.446  
5.438  
5.423

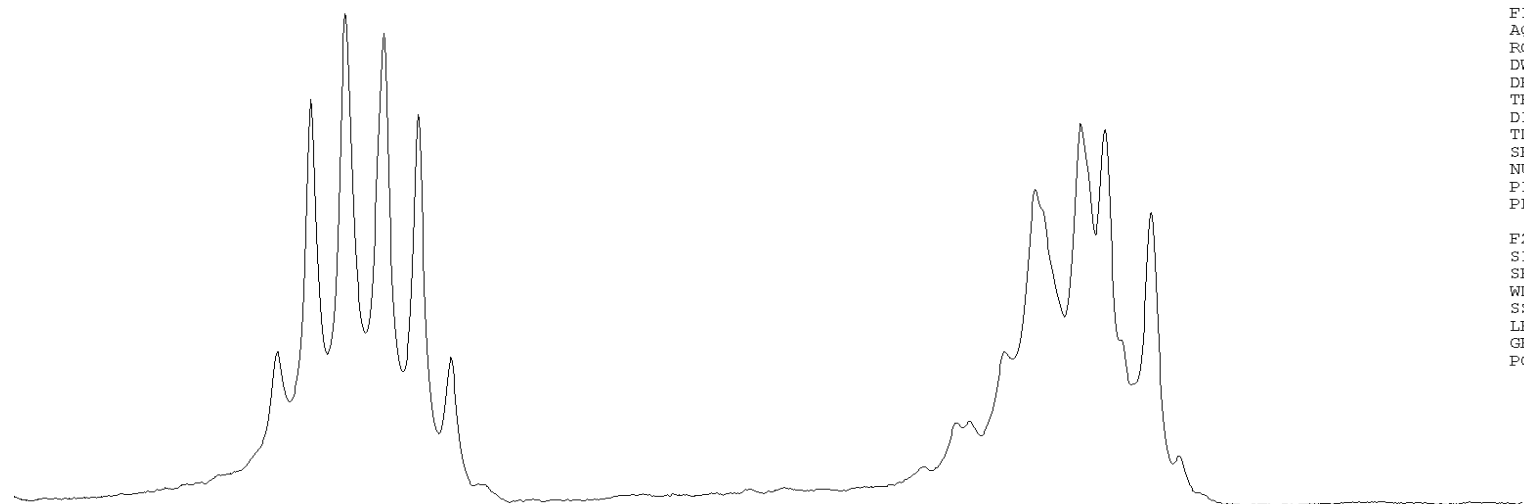

Current Data Parameters  
NAME 168CLC-57.3-rfc80\*-rp10-1H-CD3OD-2.9 mg  
EXPNO 1  
PROCNO 1

F2 - Acquisition Parameters  
Date\_ 20180717  
Time 11.43 h  
INSTRUM spect  
PROBHD Z114607\_0270 (  
PULPROG zg30  
TD 65536  
SOLVENT MeOD  
NS 64  
DS 2  
SWH 12019.230 Hz  
FIDRES 0.366798 Hz  
AQ 2.7262976 sec  
RG 109.62  
DW 41.600 usec  
DE 6.50 usec  
TE 296.5 K  
D1 1.00000000 sec  
TD0 1  
SFO1 600.3147069 MHz  
NUC1 1H  
P1 10.00 usec  
PLW1 24.25499916 W

F2 - Processing parameters  
SI 65536  
SF 600.3110118 MHz  
WDW EM  
SSB 0  
LB 0.30 Hz  
GB 0  
PC 1.00

5.75 5.70 5.65 5.60 5.55 5.50 5.45 5.40 5.35 ppm

1.00

1.00



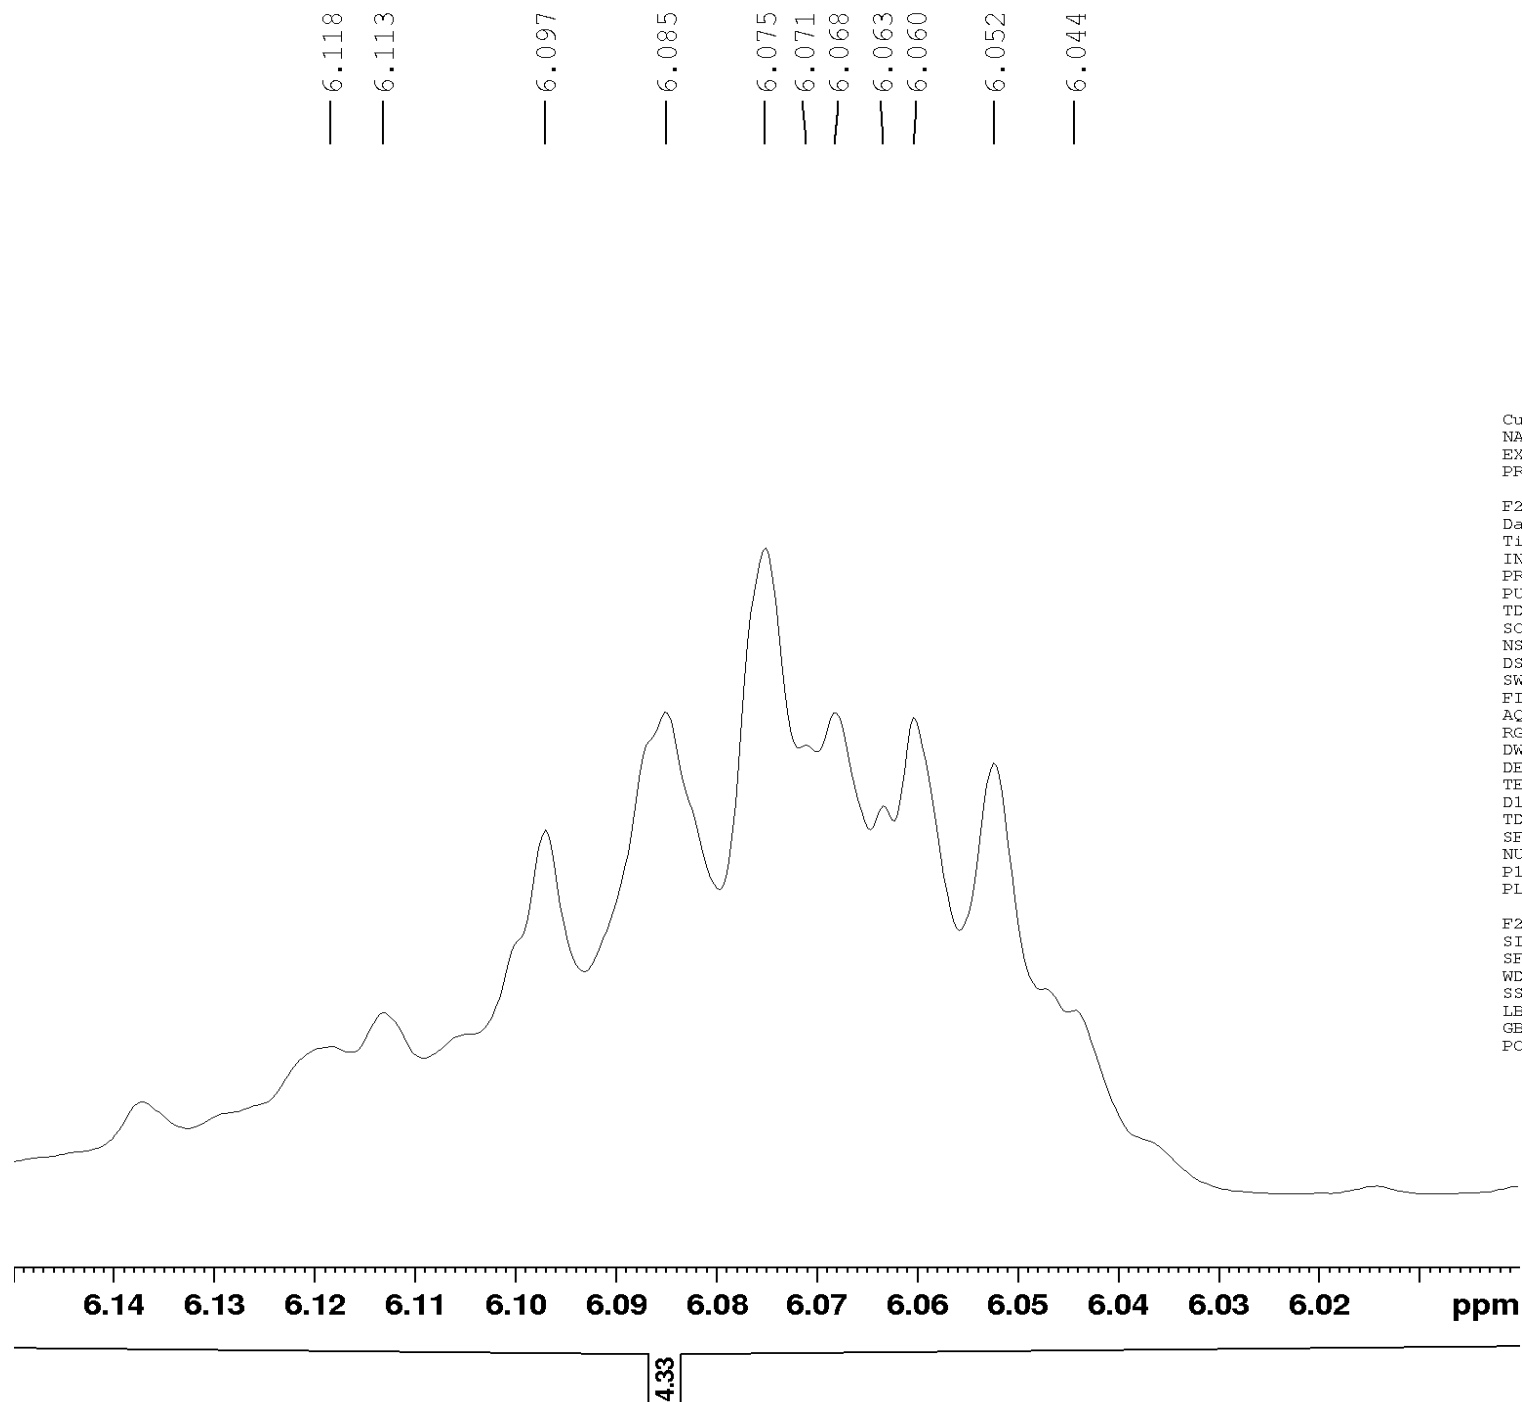

Current Data Parameters  
NAME 168CLC-57.3-rfc80\*-rp10-1H-CD3OD-2.9 mg  
EXPNO 1  
PROCNO 1

F2 - Acquisition Parameters  
Date\_ 20180717  
Time 11.43 h  
INSTRUM spect  
PROBHD Z114607\_0270 (z  
PULPROG zg30  
TD 65536  
SOLVENT MeOD  
NS 64  
DS 2  
SWH 12019.230 Hz  
FIDRES 0.366798 Hz  
AQ 2.7262976 sec  
RG 109.62  
DW 41.600 usec  
DE 6.50 usec  
TE 296.5 K  
D1 1.00000000 sec  
TD0 1  
SFO1 600.3147069 MHz  
NUC1 1H  
P1 10.00 usec  
PLW1 24.25499916 W

F2 - Processing parameters  
SI 65536  
SF 600.3110118 MHz  
WDW EM  
SSB 0  
LB 0.30 Hz  
GB 0  
PC 1.00

Figure S43.  $^{13}\text{C}$  NMR spectrum of 2-O-acetyldendrodochol B (10)

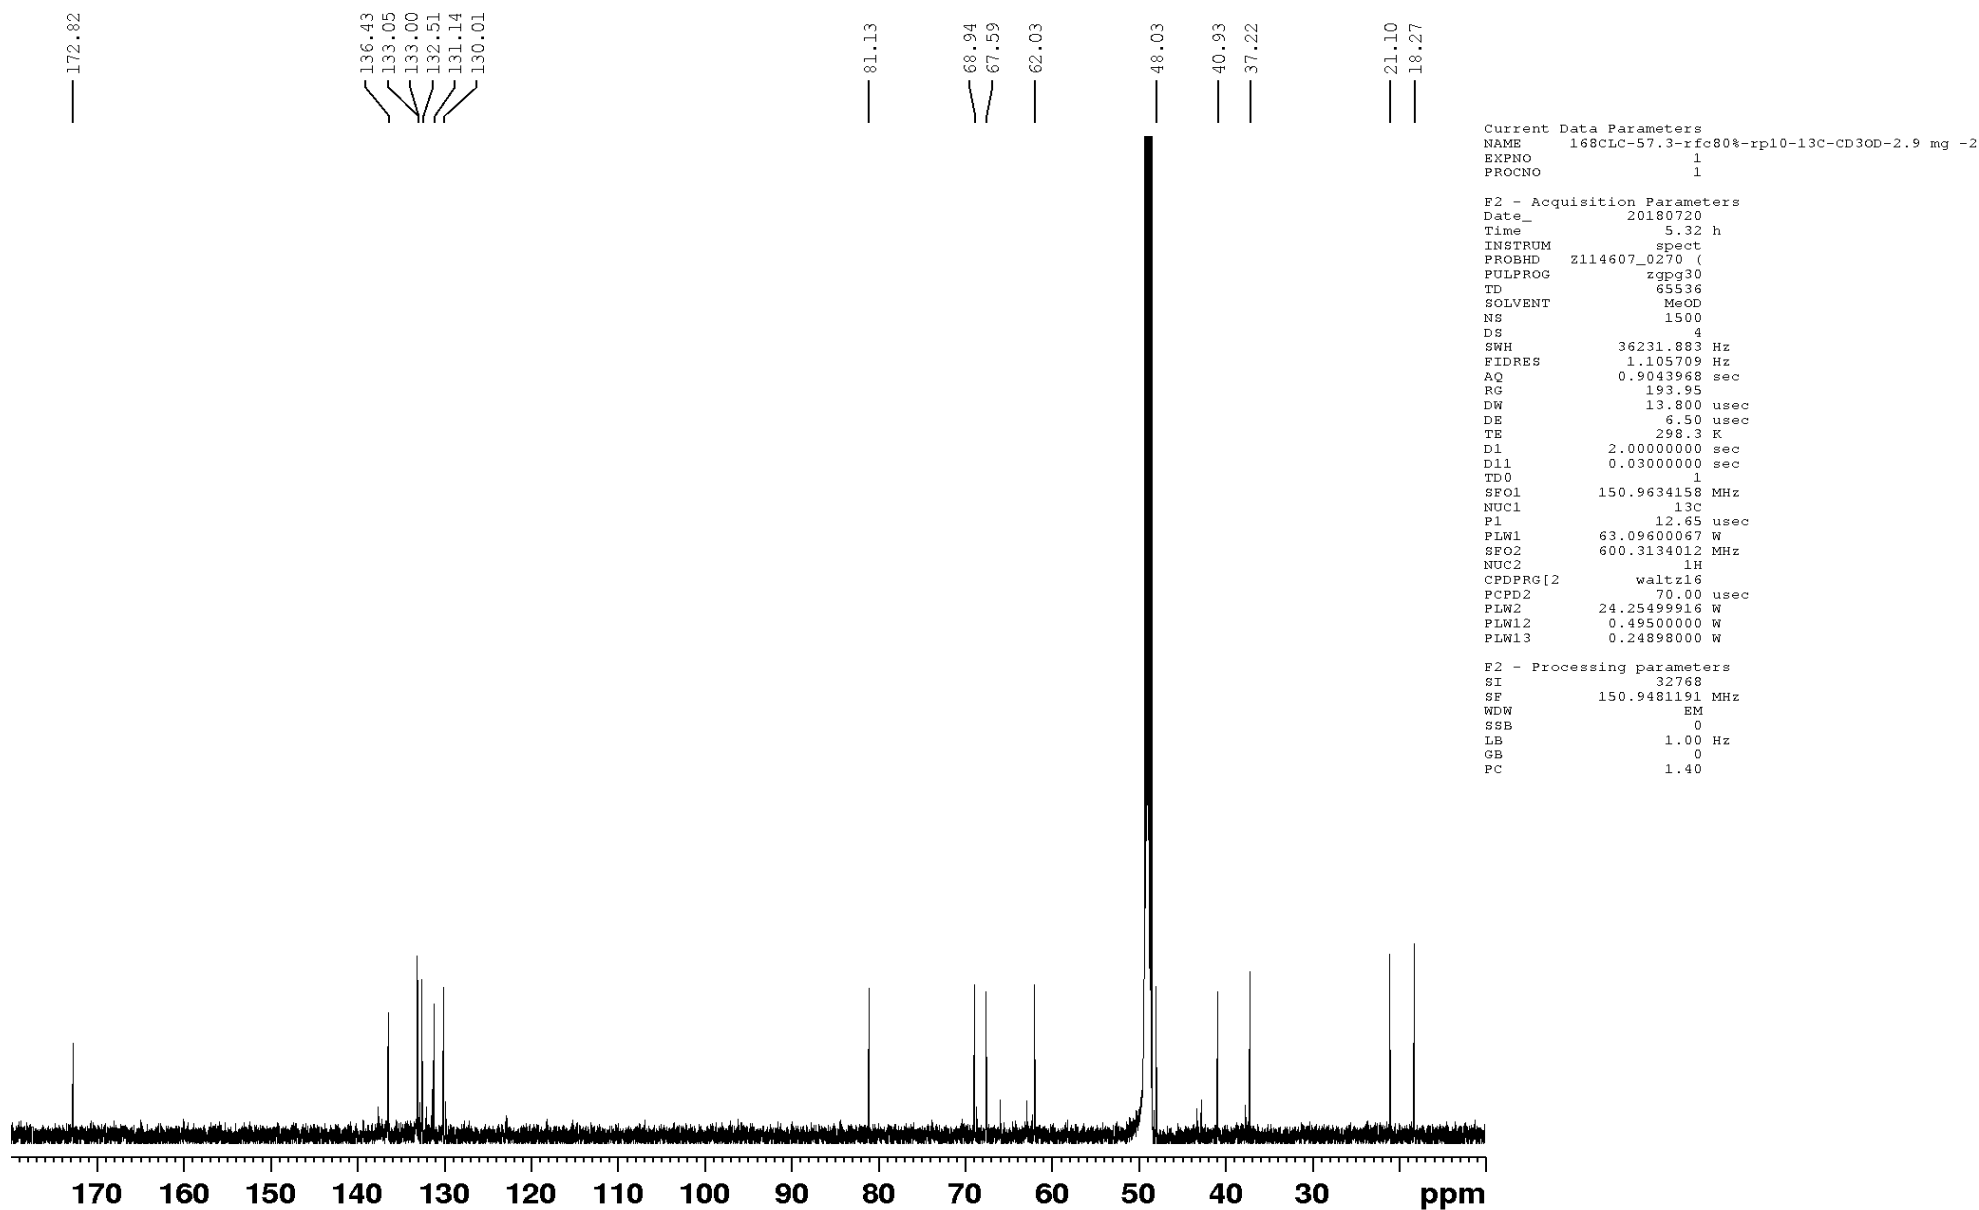

Figure S44. HMBC spectrum of 2-O-acetyldendrochol B (10)

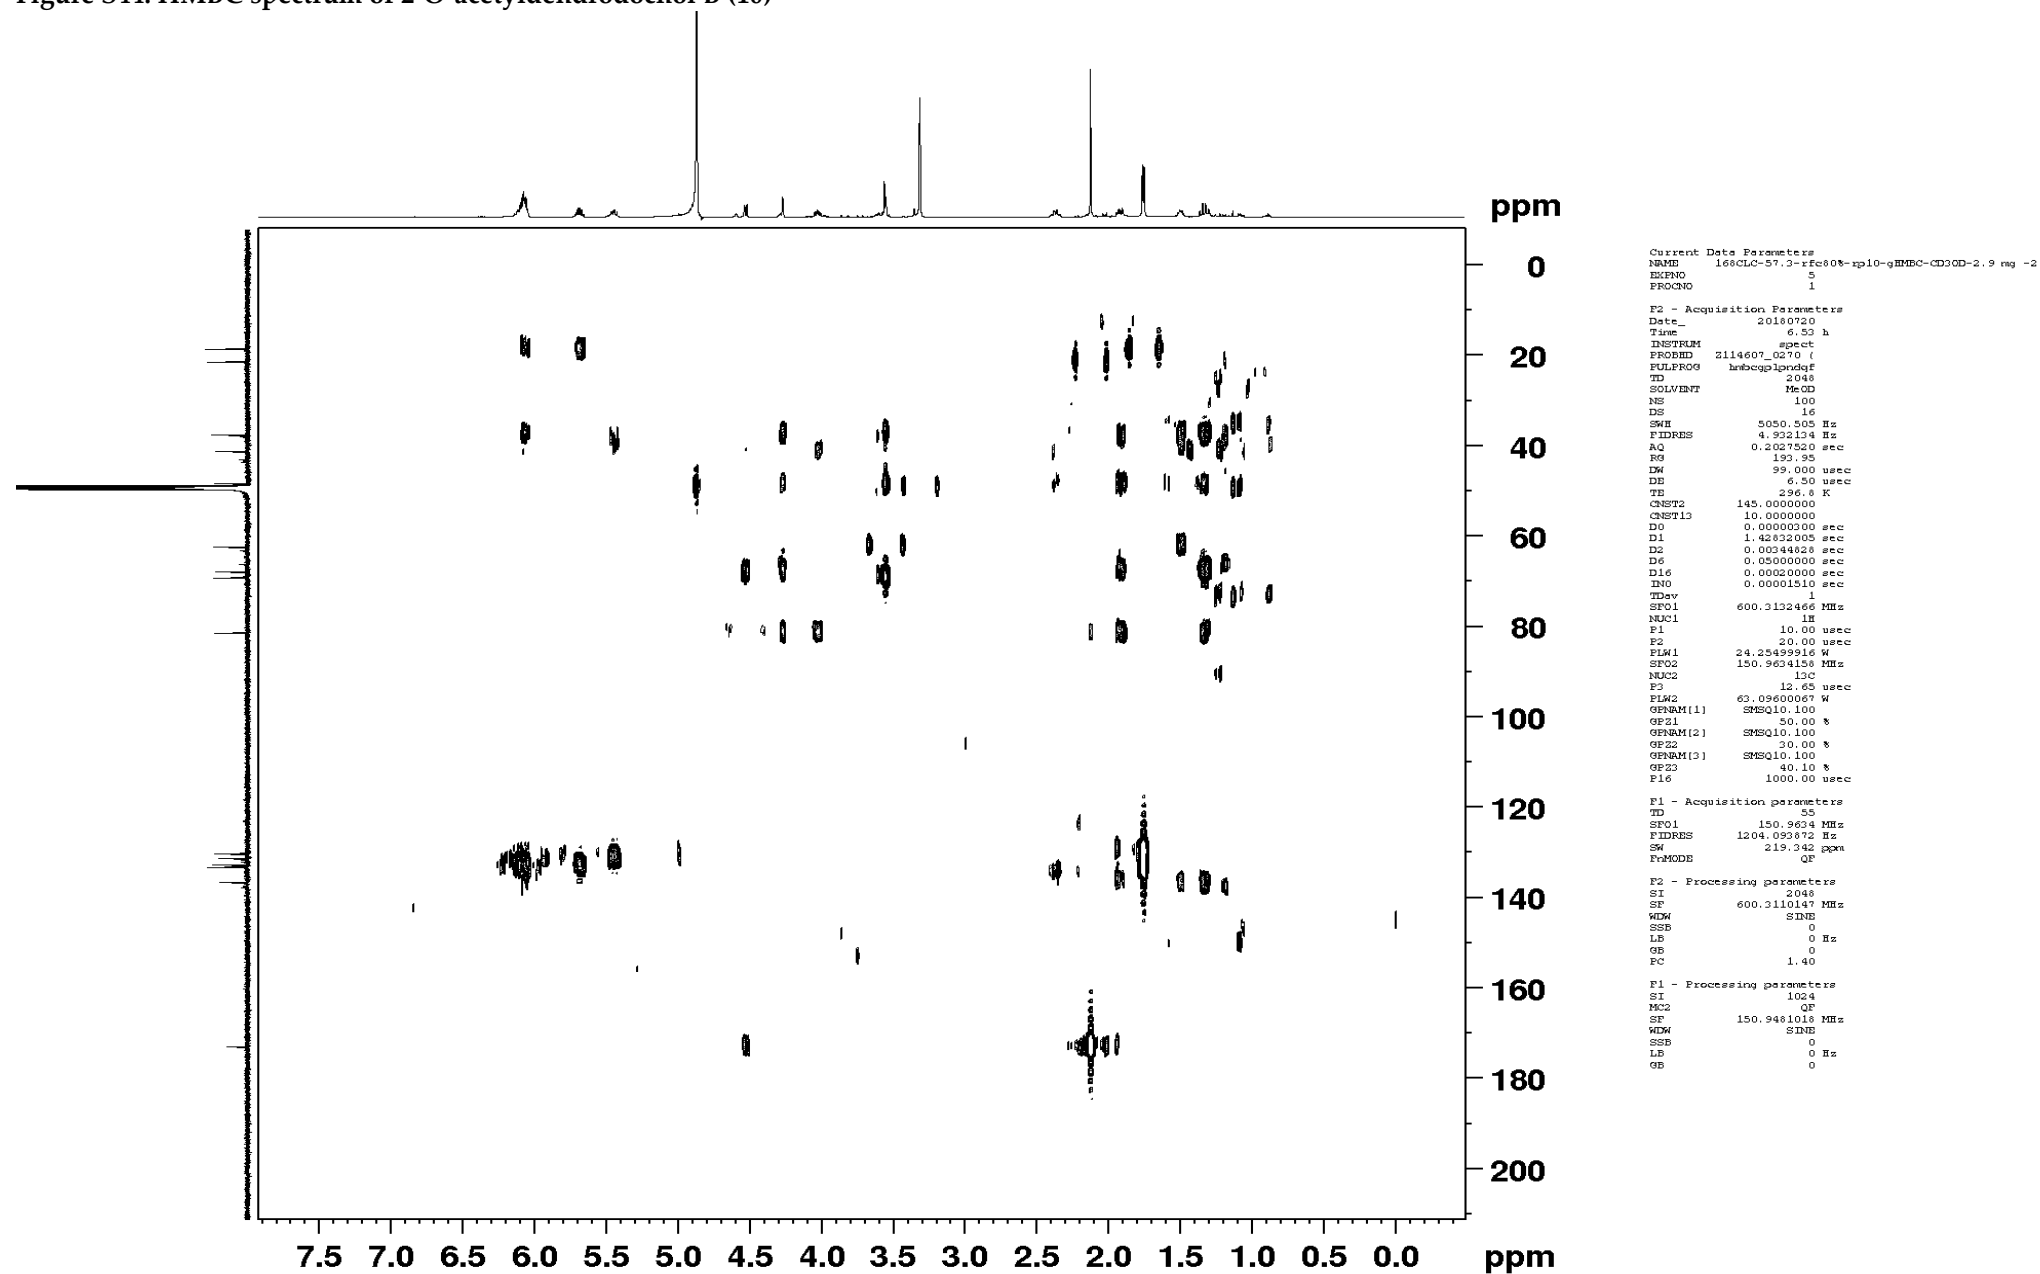

Figure S45. HSQC spectrum of 2-O-acetyldendrochol B (10)

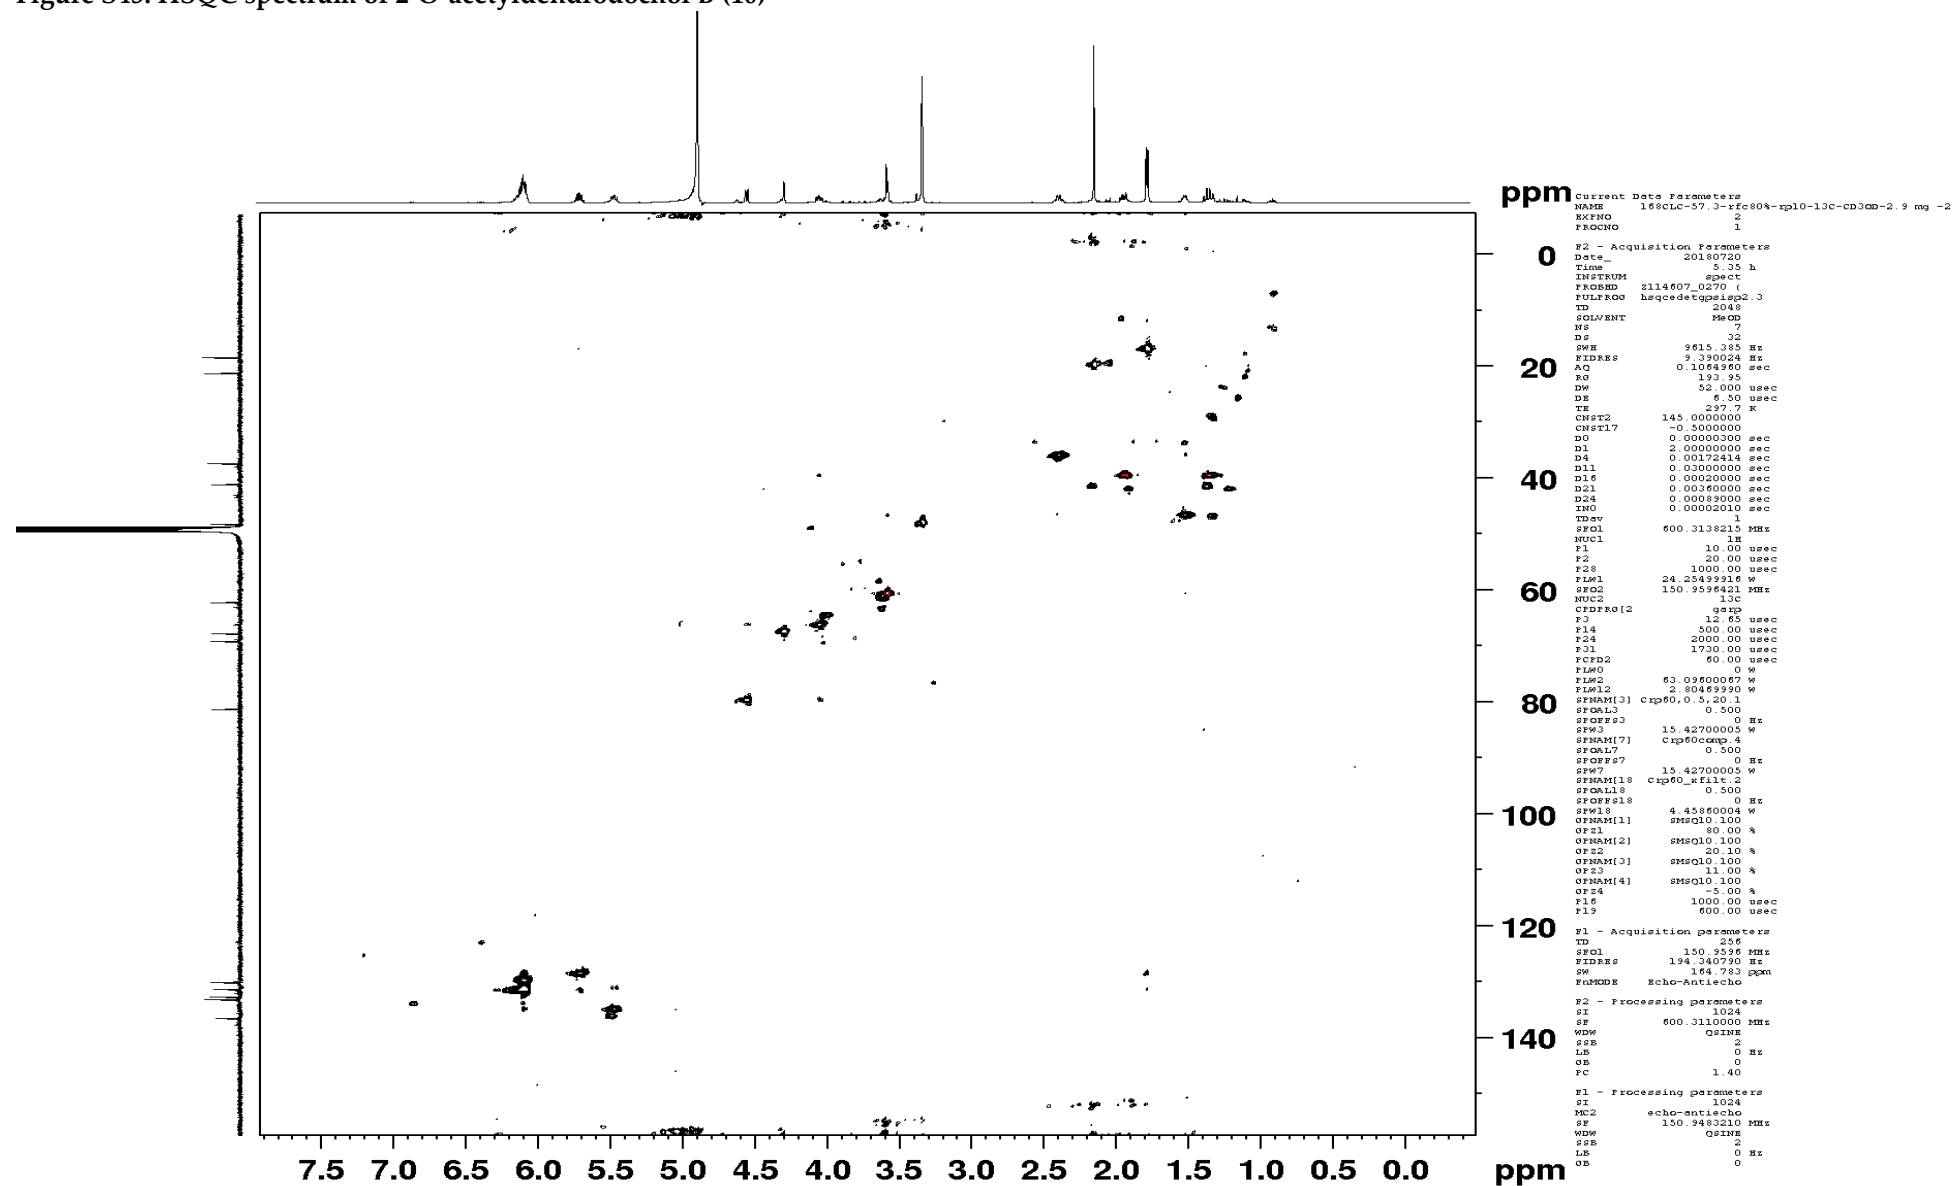

**Figure S46. HR (+)ESI MS spectrum of lopouzanone A (1)**

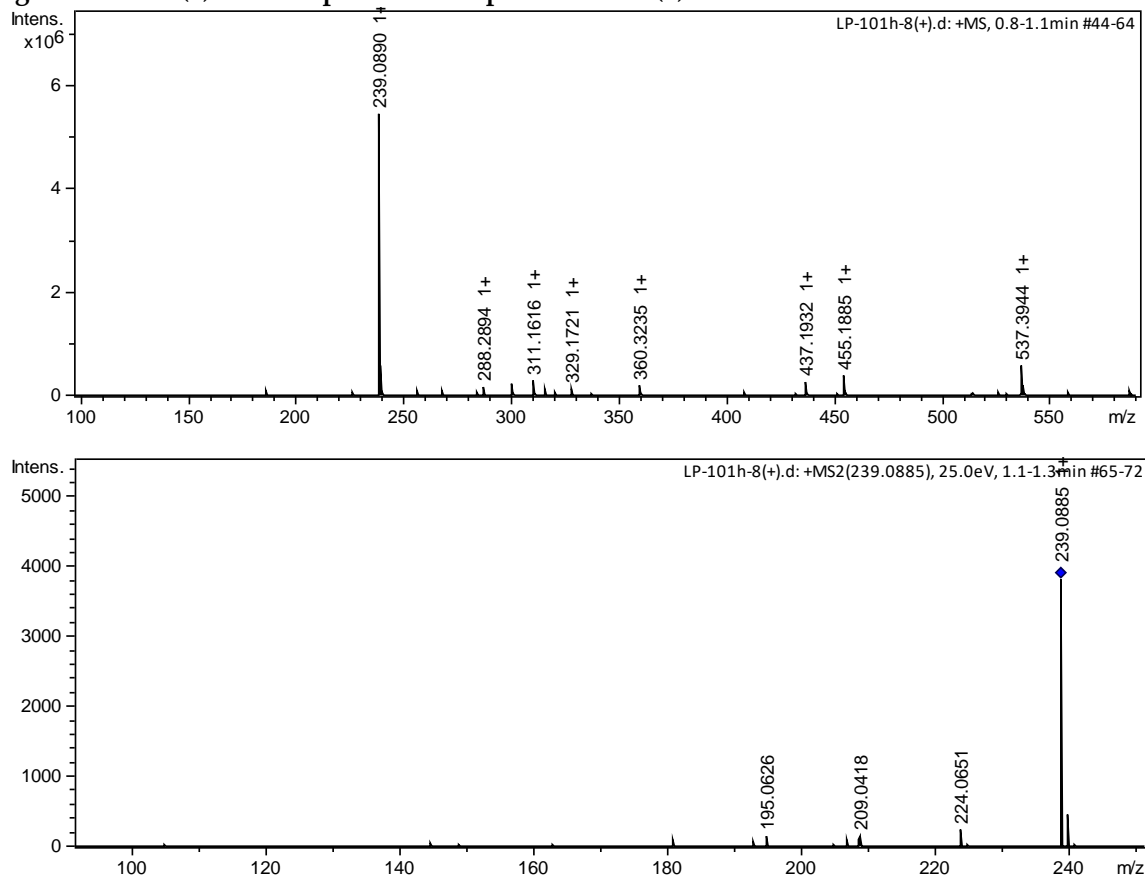

**Figure S47. HR (+)ESI MS spectrum of lopouzanone B (2)**

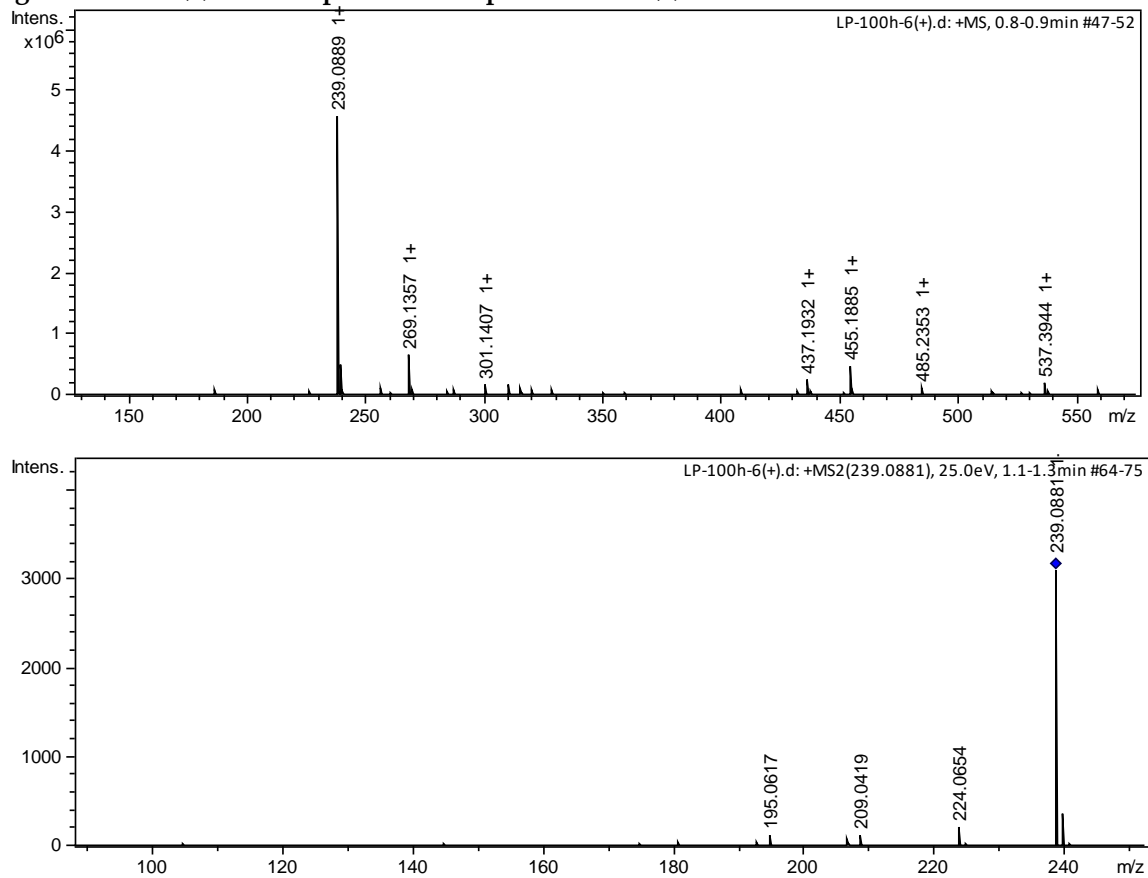

Figure S48. HR (+)ESI MS spectrum of dendrochol B (8)

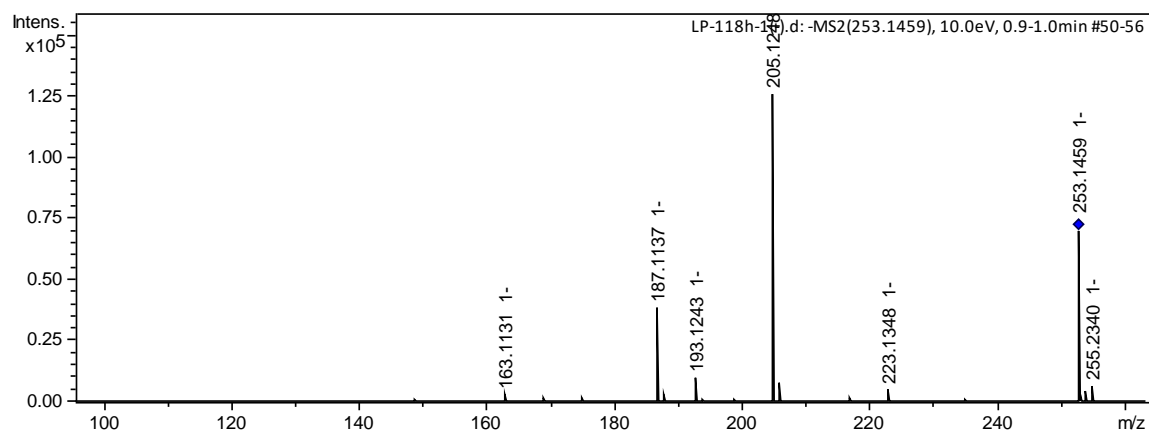

Figure S49. HR (+)ESI MS spectrum of 1-O-acetyldendrochol B (9)

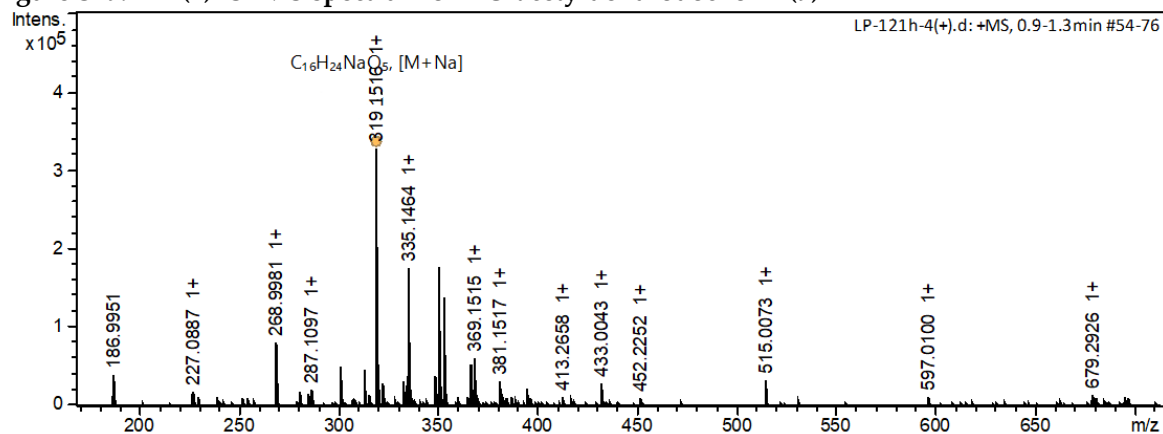

Figure S50. HR (+)ESI MS spectrum of 2-O-acetyldendrochol B (10)

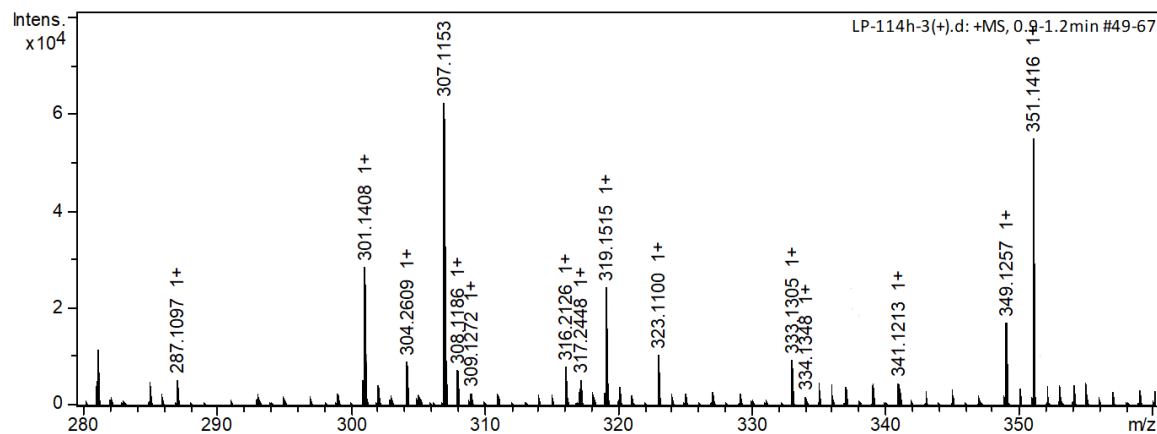

Supplement: s1 [file s1]
